# Supplementary material for: Single-cell RNA sequencing of mouse islets exposed to proinflammatory cytokines
Source: Life Sci Alliance. 2021 Apr 21;4(6):e202000949. doi: 10.26508/lsa.202000949 (PMC8091599; doi:10.26508/lsa.202000949)
Supplement: Supplementary file 1 [file LSA-2020-00949_TableS1.xlsx]

## Sheet: Pancreas_all_markers
Cluster	Gene	Avg ln(Fold change) [cluster of interest vs. all others]	Fraction cells in cluster expressing gene	Fraction cells not in cluster expressing gene	Adjusted p-value
0	G6pc2	0.704726	0.921	0.545	3.16849e-244
0	Ins1	0.588815	1	0.959	2.33587e-182
0	Igf1r	0.595451	0.92	0.642	1.39477e-181
0	Crybb3	0.97533	0.612	0.271	2.22218e-180
0	Gsdma	0.472171	0.844	0.501	9.41257e-170
0	Acly	0.427433	0.998	0.89	7.95842e-164
0	Scnn1b	0.383644	0.839	0.521	6.86014e-154
0	Stk26	0.330189	0.522	0.226	7.66447e-139
0	Syt4	0.476047	0.935	0.699	4.29083e-138
0	Edem1	0.37641	0.829	0.539	7.49269e-133
0	Prss53	0.387763	0.871	0.535	8.6919e-130
0	Ubr4	0.416062	0.852	0.63	4.80828e-127
0	Gng12	0.368038	0.98	0.816	4.57283e-122
0	Ceacam1	0.370603	0.295	0.085	7.76945e-116
0	Iapp	0.384828	1	0.986	2.4386e-114
0	Pfkp	0.391983	0.8	0.528	2.18038e-111
0	Scarb2	0.347917	0.898	0.675	4.19483e-110
0	Bace2	0.314898	0.898	0.615	1.51802e-104
0	C2cd4b	0.404814	0.83	0.565	8.70232e-104
0	Glul	0.507922	0.932	0.76	4.18853e-103
0	Papss2	0.305672	0.865	0.561	1.94208e-99
0	Cd164	0.309996	0.998	0.93	3.06459e-97
0	Pcsk1	0.333941	0.801	0.51	3.07104e-97
0	Wars	0.464696	0.806	0.553	3.88334e-96
0	Maob	0.292713	0.644	0.369	5.39956e-95
0	Tmem215	0.272512	0.642	0.363	5.71408e-93
0	Ins2	0.406699	1	0.997	2.37695e-91
0	Gng4	0.289702	0.799	0.542	4.94184e-88
0	Shc1	0.280957	0.751	0.487	7.41192e-88
0	Fkbp1b	0.282379	0.713	0.449	1.38881e-86
0	Cttnbp2	0.261817	0.652	0.38	4.44907e-85
0	Entpd3	0.290492	0.73	0.483	3.86609e-81
0	Rgs4	0.490596	0.709	0.443	3.88742e-80
0	Tmem108	0.251724	0.656	0.407	1.95097e-73
0	P4hb	0.250808	0.972	0.861	1.65016e-72
0	Mt1	0.496241	0.981	0.895	4.63987e-72
0	Dgkg	0.251427	0.413	0.2	7.70609e-71
0	Mt2	0.550731	0.888	0.713	5.96676e-70
0	Ero1lb	0.275595	0.912	0.651	6.93636e-70
0	Sept9	0.280765	0.764	0.534	7.01611e-70
0	Ccl28	0.25021	0.346	0.15	1.74752e-69
0	Pabpc1	0.458807	0.989	0.934	2.09668e-67
0	Mettl7a1	0.252002	0.534	0.319	1.4289e-65
0	Isg20	0.282406	0.956	0.804	3.80824e-65
0	Ank2	0.251656	0.809	0.588	2.32675e-64
0	Neurod1	0.325568	0.876	0.675	9.78484e-63
0	Wipi1	0.299108	0.574	0.354	1.08827e-60
0	Gfpt1	0.253383	0.952	0.801	4.69102e-59
0	Insm1	0.262578	0.838	0.62	6.0827e-57
0	Hist1h1c	0.280819	0.772	0.571	3.22028e-50
0	Pdzk1ip1	0.28675	0.524	0.339	4.04858e-47
0	Mafa	0.306412	0.613	0.4	1.80803e-45
0	Sowahc	0.250242	0.718	0.522	2.48131e-42
0	Il4i1	0.257646	0.278	0.134	1.03309e-40
0	Ero1l	0.292222	0.712	0.527	1.30891e-40
0	Tifa	0.420851	0.389	0.233	2.97656e-40
0	Defb1	0.49059	0.592	0.486	7.55458e-23
0	Sod2	0.25911	0.875	0.813	5.84542e-17
0	Marcks	0.252218	0.806	0.707	1.73326e-11
1	Ins21	0.717544	1	0.997	0
1	Ins11	0.757595	1	0.961	1.55181e-261
1	Slc2a2	0.555271	0.638	0.208	4.40271e-250
1	Ppp1r1a	0.717557	0.87	0.464	1.41406e-248
1	Mafa1	0.885359	0.792	0.371	7.10462e-227
1	Ucn3	0.468287	0.739	0.311	3.87689e-203
1	Ero1lb1	0.528512	0.967	0.652	3.85699e-200
1	Trpm5	0.389678	0.681	0.28	2.36773e-184
1	Prss531	0.444721	0.932	0.538	1.55047e-168
1	Fam151a	0.429106	0.829	0.422	9.9376e-168
1	Prlr	0.410571	0.752	0.353	1.36766e-166
1	Ttc28	0.422246	0.681	0.32	3.59707e-147
1	Ddc	0.377653	0.853	0.487	6.53911e-136
1	Slc30a8	0.376521	0.936	0.658	6.43426e-132
1	Papss21	0.360131	0.914	0.565	9.34599e-129
1	Kdm2b	0.34401	0.656	0.316	4.40688e-125
1	Sytl4	0.289682	0.74	0.363	3.48693e-124
1	Ociad2	0.35466	0.871	0.533	6.03318e-124
1	Hadh	0.379513	0.9	0.565	5.97957e-122
1	Wnt4	0.398807	0.847	0.504	7.95882e-121
1	Mlxipl	0.320802	0.696	0.346	1.5412e-117
1	Ffar1	0.279924	0.67	0.332	1.0689e-108
1	Nkx6-1	0.355327	0.817	0.502	1.01811e-106
1	Ntrk2	0.254136	0.653	0.318	5.81642e-105
1	Enho	0.288884	0.839	0.503	1.0513e-93
1	Sdf2l1	0.314165	0.918	0.648	3.76789e-82
1	Zdhhc2	0.277651	0.956	0.69	1.55311e-81
1	Iapp1	0.322075	1	0.986	1.44137e-79
1	Hepacam2	0.252014	0.751	0.44	2.1127e-77
1	Pdx1	0.251494	0.691	0.391	2.53031e-77
1	Lrrc10b	0.260251	0.745	0.444	1.75704e-76
2	Gcg	3.7118	0.998	0.749	0
2	Ttr	2.7731	0.999	0.576	0
2	Spp1	2.32424	0.897	0.234	0
2	Gpx3	1.68522	0.978	0.201	0
2	Gc	1.53086	0.935	0.144	0
2	Tmem27	1.39506	0.994	0.876	0
2	Vgf	1.35696	0.754	0.157	0
2	Fgl2	1.34734	0.909	0.379	0
2	Higd1a	1.32702	0.89	0.104	0
2	Rbp4	1.29905	0.995	0.265	0
2	Ctsz	1.28836	0.942	0.389	0
2	Gnas	1.28035	1	0.994	0
2	Pappa2	1.21409	0.756	0.056	0
2	Mafb	1.13029	0.77	0.221	0
2	Etv1	1.12605	0.818	0.186	0
2	Basp1	1.0725	0.731	0.171	0
2	Itm2b	0.956916	0.998	0.977	0
2	Cst3	0.909365	1	0.969	0
2	Irx2	0.87802	0.654	0.046	0
2	Irx1	0.803802	0.529	0.017	0
2	Sfrp5	0.789612	0.533	0.025	0
2	Arx	0.643568	0.491	0.029	0
2	Eef1a2	0.537821	0.416	0.023	0
2	Slc38a5	0.527268	0.322	0.018	0
2	Ndst4	0.480309	0.394	0.03	0
2	Id1	1.0554	0.504	0.072	3.03433e-297
2	Mctp2	0.373685	0.314	0.023	6.32957e-274
2	Spint2	0.801892	0.988	0.869	2.79343e-268
2	Pam	0.885567	0.987	0.884	1.65511e-266
2	Aplp1	0.818916	0.967	0.793	1.2807e-262
2	Rps24	0.502196	1	0.998	2.2083e-261
2	Sytl2	0.329789	0.258	0.013	1.31006e-260
2	Pcsk2	0.641666	1	0.935	7.17681e-259
2	Rab3c	0.342695	0.311	0.027	3.53773e-245
2	Tmed3	0.772817	0.975	0.88	4.09134e-234
2	Malat1	0.700355	0.999	0.995	4.47877e-233
2	Kcnk3	0.35647	0.303	0.027	2.89204e-231
2	S100a11	0.817388	0.979	0.845	4.04115e-230
2	Tm4sf4	1.09549	0.949	0.755	7.63795e-230
2	Cd81	0.768046	0.904	0.383	8.39317e-229
2	Pyy	0.625347	0.946	0.503	1.12559e-228
2	Gria2	0.672033	0.515	0.113	3.59835e-228
2	Rps27a	0.480945	1	0.998	4.34447e-227
2	Rpl27a	0.464993	1	0.998	5.88746e-225
2	Nxph1	0.398103	0.333	0.038	1.41795e-223
2	Id3	0.715628	0.606	0.155	2.66566e-222
2	Scg5	0.578388	0.996	0.927	4.45352e-222
2	App	0.76063	0.938	0.626	2.45227e-217
2	Rpl35a	0.487099	1	0.996	6.52693e-206
2	Ace2	0.402131	0.345	0.048	7.29437e-199
2	Epcam	0.637939	0.959	0.765	3.24582e-188
2	Resp18	0.630248	0.996	0.899	2.71592e-185
2	Oat	0.404172	0.357	0.057	2.24589e-184
2	Rasgrf2	0.449705	0.409	0.083	3.97196e-182
2	Rpl23a	0.504238	0.999	0.979	2.13783e-180
2	Rplp2	0.468717	0.999	0.992	6.17848e-180
2	Ctsl	0.789072	0.987	0.941	9.28473e-179
2	Sgce	0.356131	0.348	0.055	2.83822e-177
2	Rpl30	0.423941	1	0.998	1.22135e-176
2	Rpl13	0.354778	1	0.999	9.05773e-175
2	Rps23	0.425673	1	0.998	1.35677e-168
2	Ptprd	0.459715	0.443	0.112	6.64145e-168
2	Atp5e	0.537804	0.987	0.953	3.5545e-167
2	C8b	0.36046	0.335	0.059	9.83398e-167
2	Rpl19	0.359484	1	0.999	1.72493e-165
2	Cystm1	0.626571	0.942	0.802	4.26741e-164
2	Rps16	0.393379	1	0.995	6.27647e-163
2	Rpl7	0.426726	1	0.992	1.27485e-160
2	Tmem59l	0.533757	0.574	0.185	3.49258e-160
2	Cpq	0.584347	0.866	0.604	1.24326e-158
2	Wnk3	0.417102	0.305	0.049	1.71168e-158
2	Ifitm2	0.757716	0.743	0.35	5.88693e-158
2	Tmem176a	0.602625	0.942	0.819	1.73271e-156
2	Rps13	0.377618	0.999	0.997	7.5944e-155
2	Rcn3	0.291847	0.276	0.038	1.34399e-153
2	Rps10	0.377257	1	0.994	1.44307e-151
2	5330417C22Rik	0.611896	0.821	0.533	5.56358e-151
2	Cryba2	0.562	0.409	0.106	7.15896e-150
2	Rps21	0.420359	1	0.996	4.05738e-149
2	Rpl23	0.382254	1	0.998	6.39439e-148
2	Rplp1	0.356429	1	0.998	5.93635e-147
2	Rhou	0.676313	0.651	0.278	1.5278e-146
2	Rpl15	0.361374	1	0.994	1.66401e-145
2	Alcam	0.621109	0.883	0.609	2.1216e-141
2	Rps15a	0.378787	1	0.995	1.66338e-140
2	Pcsk1n	0.528559	0.999	0.934	1.77496e-139
2	Rps12	0.370546	1	0.995	2.08165e-138
2	Pak3	0.690135	0.757	0.44	8.4751e-138
2	Tmsb15b1	0.517001	0.449	0.141	3.11664e-136
2	Rps7	0.36323	1	0.993	1.223e-135
2	Fbp1	0.456041	0.303	0.057	3.17348e-133
2	Rps18	0.347988	1	0.995	4.70615e-132
2	Rpl26	0.336349	1	0.997	5.54294e-132
2	Cpe	0.391871	0.999	0.948	1.93069e-130
2	H3f3a	0.479457	0.988	0.965	8.06666e-130
2	Nenf	0.49247	0.937	0.838	1.08805e-128
2	Npm1	0.492227	0.975	0.929	1.26657e-127
2	Itm2c	0.527279	0.944	0.842	1.37764e-127
2	Rps25	0.360106	0.999	0.991	4.51171e-127
2	mt-Nd1	0.444961	1	0.982	7.23589e-127
2	Clec2d	0.392903	0.356	0.082	3.56169e-126
2	Rps17	0.375346	0.993	0.981	4.18196e-124
2	Atp5l	0.421609	0.989	0.965	1.84202e-121
2	Rpl34	0.340193	0.999	0.994	7.78053e-121
2	Nudt11	0.312514	0.284	0.056	1.59574e-120
2	Npc2	0.413584	0.925	0.84	4.99394e-120
2	Gata6	0.389436	0.44	0.137	5.39743e-119
2	Rpl11	0.304404	1	0.995	2.73433e-118
2	Rps3a1	0.307349	1	0.998	2.96783e-118
2	Gm45159	0.778579	0.589	0.264	3.08144e-117
2	Pla2g12a	0.545077	0.717	0.456	1.08832e-115
2	Ddx5	0.374445	0.994	0.982	1.6033e-115
2	Prdx2	0.499955	0.918	0.824	3.309e-115
2	Dst	0.533906	0.929	0.815	7.59199e-115
2	Hist3h2ba	0.40981	0.38	0.105	1.38825e-114
2	Slc41a2	0.274782	0.284	0.059	2.14864e-114
2	Lpl	0.695417	0.891	0.648	1.34248e-113
2	Cox6c	0.467975	0.984	0.972	2.49813e-113
2	Calb1	0.333841	0.271	0.053	6.80765e-113
2	Rpl36a	0.416974	0.989	0.957	8.43009e-113
2	Ocrl	0.456786	0.578	0.248	2.42125e-112
2	Meg3	0.50044	0.993	0.92	4.99124e-112
2	Rpl14	0.325575	0.999	0.996	4.58313e-110
2	Pde4d	0.365721	0.414	0.129	7.85073e-110
2	Tspan7	0.520212	0.834	0.667	6.51742e-109
2	Hamp	1.66909	0.326	0.081	1.37641e-108
2	Rpl38	0.364126	0.999	0.99	1.44623e-108
2	Cox7c	0.418224	0.988	0.957	4.37846e-107
2	Mbnl2	0.467437	0.917	0.788	1.10338e-106
2	Eef1b2	0.377787	0.989	0.978	1.28036e-106
2	Sema3e	0.311351	0.324	0.08	4.09701e-104
2	Rpl6	0.30795	1	0.997	1.13281e-103
2	Tpt1	0.281063	1	0.999	2.25766e-103
2	Prdx4	0.491086	0.612	0.311	2.46135e-103
2	Ffar4	0.300999	0.329	0.083	8.2665e-103
2	Hmgn1	0.459242	0.874	0.727	8.84593e-103
2	Hnrnpa1	0.50537	0.866	0.686	9.00664e-103
2	Dbpht2	0.582043	0.499	0.21	3.16692e-101
2	Rplp0	0.262875	0.999	0.996	1.02825e-97
2	Bsg	0.395007	0.991	0.972	1.39948e-97
2	Hint1	0.39305	0.965	0.928	2.91635e-96
2	Ang	0.601003	0.799	0.595	1.44508e-95
2	Peg3	0.510833	0.967	0.861	5.66047e-95
2	Sdf4	0.468127	0.884	0.798	5.68593e-95
2	Rpsa	0.302773	0.996	0.996	8.25074e-95
2	Tmsb15b2	0.56429	0.466	0.2	1.85209e-94
2	H2-D1	0.34959	0.989	0.96	7.75121e-94
2	Gng2	0.39269	0.464	0.175	3.23082e-92
2	Cd9	0.454279	0.477	0.177	4.83953e-92
2	Smarca1	0.344127	0.346	0.104	4.46662e-90
2	Rpl5	0.300848	1	0.997	3.96361e-89
2	Rpl17	0.266843	0.999	0.997	1.13567e-88
2	Rps29	0.306435	1	0.994	2.62787e-87
2	Calm2	0.376388	0.96	0.9	7.43464e-87
2	Gnai1	0.33197	0.334	0.106	9.44097e-87
2	Rps4x	0.27828	1	0.997	1.14139e-86
2	Nostrin	0.374603	0.359	0.114	2.53965e-86
2	Fgb	0.99745	0.27	0.066	1.5351e-85
2	Map3k15	0.472077	0.563	0.314	1.01071e-84
2	Rps27l	0.43266	0.959	0.913	1.00414e-83
2	Nap1l5	0.407554	0.439	0.181	1.31325e-82
2	Gls	0.531595	0.731	0.545	4.45329e-82
2	Rpl21	0.267234	0.998	0.996	1.27556e-81
2	Rpl8	0.254733	1	0.997	8.4251e-80
2	Sdc2	0.39627	0.534	0.279	1.03904e-77
2	mt-Nd3	0.395732	1	0.947	3.23223e-77
2	Ugt2b34	0.467214	0.528	0.282	4.58303e-77
2	Rcn1	0.311706	0.393	0.149	6.01262e-77
2	Rpl7a	0.276949	0.989	0.985	9.24564e-77
2	Rps26	0.312379	0.986	0.97	1.99815e-76
2	Lamp2	0.418801	0.944	0.897	4.35773e-76
2	Naca	0.285361	0.987	0.98	1.49439e-75
2	Rps9	0.258801	0.998	0.994	2.04795e-75
2	Atp5c1	0.360416	0.943	0.891	1.09308e-74
2	Tmsb10	0.384216	0.695	0.479	2.81258e-74
2	Myo1b	0.417815	0.574	0.316	4.85312e-74
2	Mat1a	0.431452	0.537	0.286	4.60534e-73
2	Srsf3	0.376381	0.88	0.76	1.18315e-72
2	Dnajc12	0.488628	0.731	0.569	1.63783e-72
2	Ybx1	0.297299	0.977	0.954	2.08167e-72
2	Stx16	0.342746	0.472	0.22	7.09758e-71
2	Snrpf	0.370583	0.798	0.655	1.6899e-70
2	mt-Nd2	0.342308	1	0.988	1.80419e-70
2	Rpl13a	0.375771	0.838	0.73	2.91591e-70
2	Grb10	0.322335	0.353	0.133	1.00499e-69
2	Sez6l2	0.395024	0.793	0.662	2.02675e-68
2	Atp5g2	0.325372	0.967	0.948	2.40639e-68
2	Nefm	0.372457	0.315	0.108	2.89643e-68
2	Bend7	0.392413	0.45	0.22	1.48697e-67
2	Btf3	0.282399	0.981	0.944	3.68783e-67
2	Serping1	0.41394	0.841	0.673	6.29206e-67
2	H3f3b	0.323329	0.988	0.98	1.3227e-66
2	Gria3	0.28185	0.348	0.13	2.65477e-66
2	Ikbip	0.411893	0.488	0.267	4.13632e-65
2	Rack1	0.258802	0.999	0.991	6.17856e-65
2	Trim35	0.450791	0.687	0.513	8.90168e-64
2	Rps15	0.283006	0.996	0.986	6.6881e-63
2	Itpr1	0.444607	0.575	0.348	1.24401e-62
2	Pitpnc1	0.330389	0.411	0.179	3.01329e-62
2	Nav2	0.422553	0.75	0.597	3.3678e-62
2	Rpl39	0.281484	1	0.992	1.6186e-61
2	Hnrnpdl	0.36104	0.801	0.687	4.57005e-61
2	Eif1b	0.402604	0.785	0.682	5.38273e-61
2	Rgs41	0.479665	0.729	0.473	7.39717e-61
2	Atp5j	0.308648	0.949	0.937	7.53184e-60
2	Pomp	0.31368	0.937	0.904	4.52797e-59
2	Nucb1	0.350827	0.723	0.575	6.59461e-59
2	Muc1	0.305571	0.259	0.082	9.30631e-59
2	Camk2d	0.366911	0.596	0.362	1.26597e-58
2	Ndn	0.376827	0.542	0.33	1.37878e-58
2	Ncam1	0.43593	0.682	0.516	4.44912e-58
2	Hmgn5	0.332401	0.417	0.205	1.19114e-57
2	Socs3	0.448542	0.528	0.304	2.27536e-57
2	Mrpl33	0.423589	0.734	0.592	8.84057e-57
2	Uqcrh	0.285557	0.977	0.938	1.56044e-56
2	Snrpe	0.342263	0.768	0.632	1.6357e-56
2	Klf4	0.294333	0.318	0.124	5.0194e-55
2	Ptprn	0.343823	0.916	0.843	1.61781e-54
2	Mageh1	0.426736	0.737	0.616	2.18935e-54
2	Tmed10	0.288528	0.972	0.963	8.34289e-54
2	Il1r1	0.432851	0.829	0.704	2.03145e-53
2	Ube2b	0.320557	0.838	0.758	5.87837e-53
2	Ndufa6	0.307728	0.903	0.847	1.15531e-52
2	Msi2	0.425741	0.742	0.632	1.44865e-52
2	Swi5	0.33326	0.907	0.866	1.70934e-52
2	Slc25a5	0.333672	0.918	0.895	3.89865e-52
2	Tomm7	0.341492	0.85	0.788	5.10233e-52
2	Oaz1	0.261407	0.98	0.97	1.83001e-51
2	Lsm6	0.337008	0.834	0.778	1.88519e-51
2	Zdbf2	0.377182	0.56	0.36	2.01419e-51
2	Anxa6	0.401619	0.731	0.568	7.33091e-51
2	Rbbp7	0.366134	0.807	0.723	1.21958e-50
2	Ehf	0.309383	0.446	0.217	5.81808e-50
2	Pgrmc1	0.335839	0.752	0.61	2.24347e-49
2	Shroom3	0.267206	0.283	0.11	7.33621e-49
2	Bax	0.383441	0.8	0.723	1.41635e-48
2	Zfp704	0.372524	0.55	0.362	2.01457e-48
2	Paip2	0.294695	0.867	0.812	4.9846e-48
2	Isl1	0.368168	0.799	0.677	5.38011e-48
2	Tmem176b	0.348002	0.922	0.886	8.71987e-48
2	Lgals3bp	0.32897	0.96	0.901	1.14773e-47
2	Prox1	0.347034	0.482	0.282	1.59758e-47
2	Tuba1a	0.350353	0.845	0.76	1.3096e-46
2	Tbca	0.273836	0.881	0.831	1.4658e-46
2	Slc25a3	0.255475	0.946	0.944	4.09683e-46
2	Psma2	0.27462	0.922	0.865	5.46667e-46
2	Slc7a2	0.489763	0.581	0.428	8.22598e-46
2	Sem1	0.257425	0.937	0.905	1.48084e-44
2	Slc38a4	0.381523	0.655	0.506	5.07723e-44
2	Hnrnpa2b1	0.280813	0.946	0.924	3.23062e-43
2	Tubb5	0.339165	0.808	0.712	1.66005e-42
2	Glud1	0.333009	0.634	0.493	2.4614e-42
2	Pbx1	0.327991	0.643	0.496	1.75835e-40
2	Fam43a	0.257844	0.255	0.099	1.81385e-40
2	Fam3c	0.277372	0.409	0.231	4.57536e-40
2	Selenoi	0.291751	0.45	0.273	2.49252e-39
2	Slc25a4	0.258484	0.894	0.842	4.60799e-39
2	Rpl27	0.270613	0.824	0.756	2.7583e-38
2	Pcbd1	0.30988	0.757	0.663	5.66369e-38
2	Atp6ap1	0.289015	0.819	0.745	8.73271e-38
2	Itgb1	0.26836	0.765	0.673	9.25768e-37
2	Usp29	0.323287	0.489	0.323	1.89585e-36
2	Sdhd	0.307322	0.669	0.578	1.96138e-36
2	Ssbp2	0.302058	0.48	0.31	3.15986e-36
2	Atxn10	0.267001	0.732	0.648	5.78556e-36
2	Gabarapl2	0.250533	0.895	0.869	1.70861e-35
2	Cct2	0.261884	0.8	0.755	2.13914e-35
2	Steap4	0.682327	0.44	0.261	2.60032e-35
2	Nbdy	0.326399	0.569	0.439	6.47321e-35
2	Glo1	0.293302	0.694	0.6	9.74633e-35
2	Tle1	0.276171	0.464	0.286	9.82858e-35
2	Cpn1	0.318573	0.486	0.338	1.35734e-34
2	Atpif1	0.266694	0.933	0.904	3.43737e-34
2	Sbno2	0.322666	0.512	0.335	3.7031e-34
2	Eif3i	0.263189	0.801	0.731	4.38548e-34
2	Meis2	0.263552	0.82	0.735	1.27491e-33
2	Ifih1	0.344044	0.416	0.251	1.97175e-33
2	Rnase4	0.3072	0.85	0.747	6.01735e-33
2	Tnr	0.253184	0.333	0.181	2.44714e-32
2	Ergic3	0.283402	0.645	0.546	2.46222e-32
2	Jun	0.31916	0.833	0.728	8.75408e-32
2	Wnk1	0.258032	0.88	0.858	1.37533e-31
2	Acp1	0.275612	0.687	0.594	1.98483e-31
2	Usmg5	0.268455	0.838	0.797	5.08255e-31
2	Sdc4	0.317034	0.723	0.617	1.99855e-30
2	Znrf1	0.295067	0.589	0.426	2.58983e-30
2	Top2b	0.27321	0.487	0.346	2.67922e-30
2	Zwint	0.256097	0.807	0.77	6.34081e-30
2	Rnf130	0.273919	0.826	0.772	7.64826e-30
2	Brd8	0.276431	0.627	0.514	2.63976e-29
2	Cox14	0.251528	0.745	0.689	4.72748e-29
2	Fas	0.257789	0.299	0.15	6.38551e-29
2	Wdr83os	0.287143	0.611	0.522	6.52036e-29
2	Spin1	0.290207	0.486	0.338	1.1577e-28
2	Pld3	0.265013	0.485	0.342	1.30189e-28
2	Med28	0.252243	0.78	0.733	2.60185e-28
2	Ank	0.416834	0.592	0.496	2.65779e-28
2	Ndufb6	0.262664	0.717	0.671	3.07097e-28
2	Kin	0.264308	0.512	0.371	4.81806e-28
2	Zbtb20	0.252537	0.896	0.844	6.11898e-28
2	Phip	0.293173	0.769	0.708	6.55647e-28
2	Bbx	0.272106	0.758	0.696	6.77046e-28
2	Arrdc4	0.336559	0.377	0.221	1.48314e-27
2	Maged2	0.267286	0.465	0.332	7.42272e-27
2	Tspan3	0.251176	0.748	0.705	9.94266e-27
2	Amotl1	0.258016	0.349	0.209	1.02464e-26
2	Hs6st1	0.304724	0.558	0.427	1.05612e-26
2	Emc10	0.258063	0.729	0.689	3.81571e-26
2	Rgs17	0.302722	0.55	0.407	4.77547e-26
2	Kmt2a	0.262758	0.674	0.588	9.9045e-26
2	Ubqln2	0.300147	0.597	0.505	1.27925e-25
2	Txnip	0.301426	0.494	0.349	1.45649e-25
2	Eid1	0.261727	0.706	0.654	2.9583e-25
2	Robo2	0.274055	0.592	0.484	3.65183e-25
2	Polr2k	0.258877	0.609	0.515	8.97782e-25
2	Smc6	0.278601	0.658	0.584	9.03762e-25
2	Ncstn	0.252536	0.502	0.386	9.43483e-25
2	Prelid3b	0.261299	0.488	0.364	1.12234e-24
2	Foxa2	0.284937	0.548	0.439	1.40547e-24
2	Gatsl2	0.335071	0.657	0.541	2.24749e-24
2	Slc7a8	0.338529	0.421	0.303	2.88375e-24
2	Hif1a	0.397168	0.682	0.589	3.57452e-24
2	Kdm7a	0.271158	0.458	0.323	4.73511e-24
2	Plekha1	0.277489	0.604	0.517	4.96361e-24
2	Ccl2	0.544513	0.289	0.15	1.57326e-23
2	Mid1ip1	0.305974	0.488	0.375	3.06999e-23
2	Bambi	0.254824	0.379	0.234	3.31361e-23
2	Ppa1	0.277993	0.769	0.717	6.71288e-23
2	Pla2g16	0.278409	0.64	0.528	1.65131e-22
2	Slc40a1	0.288748	0.353	0.223	1.99704e-22
2	Gadd45b	0.48241	0.447	0.304	4.79357e-22
2	H2-Q2	0.262649	0.582	0.493	9.54848e-22
2	Myef2	0.25312	0.475	0.361	5.49701e-21
2	Tnrc6b	0.258121	0.575	0.488	3.51841e-20
2	Celf4	0.251825	0.574	0.478	4.22181e-20
2	Kcnq1ot1	0.273043	0.866	0.82	5.35476e-20
2	Cxcl1	0.439124	0.263	0.142	1.19449e-19
2	Skil	0.322523	0.558	0.468	1.50531e-19
2	Eci2	0.2744	0.523	0.436	2.9476e-19
2	Dusp10	0.252435	0.349	0.229	5.28829e-19
2	Cnot6l	0.27989	0.749	0.726	1.09974e-18
2	Junb	0.335244	0.704	0.645	9.23379e-18
2	Ifi47	0.257	0.363	0.235	1.15824e-16
2	Sphkap	0.384217	0.57	0.522	1.29804e-14
2	Lrrn1	0.255558	0.558	0.474	5.48324e-14
2	Zcchc18	0.31712	0.494	0.423	1.12223e-13
2	Slc16a10	0.251953	0.485	0.436	2.31198e-10
2	Neurl3	0.278601	0.264	0.164	4.88905e-10
2	Selenop	0.26735	0.832	0.842	2.84242e-08
2	Gadd45g	0.35536	0.588	0.555	6.06225e-08
2	Odc1	0.289119	0.592	0.585	3.62764e-06
2	Cebpd	0.328437	0.643	0.66	0.0333119
2	Icam1	0.25202	0.348	0.297	1
2	Cebpb	0.27156	0.639	0.708	1
3	Sst	4.2312	0.997	0.26	0
3	Rbp41	2.08698	0.989	0.287	0
3	Pyy1	2.08286	0.998	0.511	0
3	Arg1	1.573	0.65	0.077	0
3	Clu	1.46104	0.974	0.403	0
3	Tspan8	1.38204	0.879	0.211	0
3	Cd24a	1.25894	0.816	0.07	0
3	Hhex	0.873519	0.541	0.026	0
3	Ly6h	0.786338	0.442	0.008	0
3	Mest	0.780359	0.482	0.014	0
3	Gap43	0.735967	0.459	0.016	0
3	Ptprz1	0.706773	0.485	0.01	0
3	Cpa2	0.503816	0.382	0.015	0
3	Gpm6a	0.453928	0.324	0.007	0
3	Dpp6	0.403894	0.318	0.013	0
3	Gpx31	0.961393	0.905	0.23	1.15041e-287
3	Chgb	1.30291	0.995	0.933	1.54296e-279
3	Ppy	0.970746	0.965	0.644	5.24368e-264
3	Cela1	0.635065	0.412	0.046	5.12991e-257
3	Ehf1	0.980807	0.733	0.197	1.99063e-252
3	Cadm1	0.89566	0.705	0.183	6.88694e-247
3	Ncam2	0.4269	0.338	0.028	3.24193e-244
3	Stxbp5l	0.641	0.492	0.08	3.82703e-233
3	Epcam1	1.0652	0.966	0.77	8.50698e-213
3	H3f3b1	0.757316	0.995	0.979	3.53595e-178
3	Scg2	0.584288	0.998	0.939	5.76462e-177
3	Mef2c	0.406393	0.33	0.04	7.38841e-177
3	4930539E08Rik	0.864658	0.361	0.053	1.19921e-171
3	Fam159b	1.21125	0.892	0.579	1.13498e-170
3	Gnas1	0.643331	0.998	0.994	7.47632e-170
3	Auts2	0.850925	0.808	0.451	2.07964e-169
3	Ambp	0.676403	0.459	0.103	1.46277e-163
3	Meg31	0.71359	0.994	0.922	6.4378e-158
3	App1	0.733448	0.926	0.636	1.49233e-150
3	Egr1	0.988625	0.82	0.438	3.28171e-150
3	Ocrl1	0.715046	0.657	0.25	2.36239e-147
3	Ier2	1.03109	0.679	0.281	1.47222e-146
3	Ffar41	0.469301	0.41	0.083	4.72139e-146
3	Olfm1	0.613963	0.456	0.115	6.96318e-140
3	Basp11	0.621859	0.648	0.195	8.47143e-140
3	Tmem59l1	0.626648	0.591	0.195	6.97667e-138
3	Adgrf5	0.272364	0.313	0.047	1.33963e-137
3	Malat11	0.587295	0.998	0.995	3.61853e-135
3	Sulf2	0.398659	0.307	0.05	7.57792e-134
3	Spock1	0.509493	0.429	0.109	1.28195e-132
3	Rgs9	0.643715	0.601	0.233	4.3429e-130
3	Cst31	0.51809	0.982	0.971	2.10317e-128
3	Stk32a	0.681076	0.717	0.357	3.62495e-128
3	Ogfrl1	0.522018	0.404	0.1	1.30659e-123
3	Rgs171	0.770314	0.743	0.393	2.03852e-123
3	Alcam1	0.717132	0.892	0.616	2.86023e-122
3	S100a16	0.332183	0.28	0.042	1.19373e-121
3	Resp181	0.803557	0.978	0.904	2.74426e-119
3	Calm21	0.643811	0.963	0.902	5.64122e-119
3	Scg51	0.499162	0.986	0.93	1.67737e-118
3	Igfbp7	0.336386	0.899	0.701	1.89641e-118
3	Rhoc	0.51274	0.594	0.209	5.63803e-117
3	Sgce1	0.367355	0.329	0.065	9.82507e-114
3	Ctsl1	0.56901	0.98	0.943	4.26538e-107
3	Igsf5	0.406056	0.35	0.084	5.30791e-106
3	Smarca11	0.444918	0.393	0.106	7.0682e-102
3	Rbms3	0.269436	0.283	0.054	2.99245e-99
3	Sema3e1	0.378331	0.349	0.085	4.98831e-98
3	Fam46a	0.789583	0.745	0.452	9.65782e-96
3	Nostrin1	0.406958	0.404	0.117	5.38977e-91
3	Itm2b1	0.367128	0.991	0.978	1.47794e-90
3	Meis21	0.600494	0.869	0.733	1.91696e-90
3	Etv11	0.470036	0.579	0.226	2.76528e-90
3	Car8	0.521992	0.475	0.177	3.48629e-90
3	Unc5c	0.307598	0.273	0.058	5.31074e-88
3	Psme1	0.598014	0.92	0.807	8.48749e-86
3	Pcdh15	0.410619	0.378	0.119	2.28572e-83
3	Rnaset2b	0.418434	0.375	0.116	2.42053e-83
3	Rnaset2a	0.472649	0.476	0.19	2.76884e-83
3	Sumo2	0.446693	0.963	0.926	4.98357e-83
3	Ddx51	0.402565	0.991	0.983	3.70741e-81
3	Fabp5	0.551714	0.596	0.276	1.26292e-80
3	Tmtc1	0.498402	0.441	0.163	2.65981e-80
3	Pcsk21	0.345799	0.998	0.937	2.70465e-80
3	Hsp90ab1	0.437191	0.995	0.992	7.04493e-80
3	Scn3a	0.426138	0.421	0.149	3.38761e-79
3	Pam1	0.489338	0.96	0.89	7.54277e-79
3	Cd811	0.407951	0.796	0.408	5.67907e-76
3	Nebl	0.327246	0.293	0.077	6.71158e-76
3	Capsl	0.448456	0.502	0.225	3.99846e-74
3	Peg31	0.585151	0.942	0.867	4.42272e-74
3	Atp1b1	0.533369	0.843	0.703	1.53735e-73
3	Lima1	0.519558	0.579	0.296	3.01079e-73
3	Zcchc11	0.54575	0.777	0.609	1.88713e-72
3	Pak1	0.320846	0.263	0.064	5.73443e-72
3	Gng21	0.501808	0.464	0.183	5.99424e-72
3	Sri	0.520468	0.751	0.55	1.22339e-71
3	Adgrb3	0.361332	0.313	0.09	3.96986e-71
3	Plcb4	0.557821	0.556	0.279	4.43424e-71
3	Jun1	0.720335	0.871	0.727	6.02675e-71
3	Zbtb201	0.539428	0.916	0.844	7.66248e-71
3	Eif1	0.295155	0.997	0.997	2.28407e-70
3	Sim1	0.356617	0.316	0.093	1.06708e-69
3	H2-D11	0.436663	0.978	0.962	2.9615e-69
3	Npm11	0.429819	0.963	0.931	2.7542e-68
3	Slc25a31	0.401088	0.96	0.943	4.68828e-68
3	Pbxip1	0.566563	0.614	0.355	4.92456e-68
3	Bex1	0.554154	0.682	0.458	1.83071e-67
3	Klhdc8b	0.265552	0.253	0.063	5.13763e-67
3	Gprasp2	0.511774	0.464	0.209	1.26653e-66
3	Bsg1	0.416662	0.974	0.974	4.35186e-65
3	Jund	0.457657	0.954	0.919	2.01458e-63
3	Syt5	0.45852	0.475	0.225	1.22301e-62
3	Prkar1a	0.401854	0.943	0.927	2.96461e-62
3	Man2a1	0.36291	0.392	0.148	1.49383e-61
3	Bex2	0.428672	0.954	0.884	1.67926e-61
3	Cystm11	0.415082	0.889	0.811	1.32305e-60
3	Itpr11	0.514973	0.601	0.352	4.11241e-60
3	Stmn3	0.360379	0.406	0.165	5.81744e-60
3	Spint21	0.356747	0.932	0.878	7.86312e-59
3	Pcp4	0.343911	0.267	0.078	2.91353e-58
3	Gpx1	0.631538	0.837	0.72	6.14206e-58
3	5330417C22Rik1	0.460835	0.733	0.55	1.10606e-57
3	Prox11	0.416442	0.535	0.283	3.3188e-57
3	Gprasp1	0.548094	0.588	0.368	3.35683e-57
3	Pde10a	0.580072	0.579	0.338	5.00129e-57
3	Ttc3	0.481218	0.794	0.675	2.05255e-56
3	Junb1	0.632256	0.8	0.638	1.79191e-54
3	Hap1	0.593709	0.685	0.515	2.14561e-54
3	Hsp90aa1	0.643372	0.992	0.982	3.48409e-54
3	Foxp1	0.499125	0.734	0.581	4.37081e-54
3	Wipi11	0.487344	0.619	0.382	9.80358e-54
3	Bex3	0.385308	0.952	0.92	6.29716e-53
3	Pgrmc11	0.459525	0.75	0.614	5.71325e-52
3	Tmbim4	0.419058	0.873	0.803	9.49208e-52
3	Tmem132b	0.361515	0.355	0.144	9.73278e-52
3	Pitpnc11	0.340333	0.421	0.185	1.67373e-51
3	Chp1	0.523242	0.599	0.381	1.68087e-51
3	H2-T23	0.586357	0.759	0.613	1.85381e-51
3	Asph	0.428616	0.518	0.296	2.2968e-51
3	Slc35g2	0.450884	0.559	0.334	1.1551e-50
3	Tmem271	0.329938	0.943	0.884	1.2707e-50
3	Gata61	0.340243	0.375	0.152	1.78739e-49
3	Dynll1	0.391671	0.791	0.648	2.07323e-49
3	Cox6c1	0.368046	0.985	0.972	3.40044e-49
3	Psme2	0.465944	0.922	0.893	5.26579e-49
3	Ifit2	0.576146	0.278	0.093	3.75231e-48
3	Fxyd3	0.342456	0.332	0.127	5.98666e-48
3	Serping11	0.53938	0.814	0.681	3.34956e-47
3	Tmem59	0.361921	0.905	0.883	4.0783e-47
3	Folr1	0.340637	0.353	0.143	4.36267e-47
3	Myl12b	0.363506	0.82	0.728	4.58554e-47
3	Isl11	0.557187	0.773	0.683	7.58909e-47
3	Psma3	0.321599	0.942	0.914	8.20617e-47
3	Anxa4	0.449766	0.702	0.57	9.30529e-47
3	Cdh2	0.449759	0.639	0.474	4.66352e-46
3	Pnrc1	0.682739	0.854	0.736	8.3594e-46
3	Btg2	0.609216	0.771	0.679	1.28558e-45
3	Cd47	0.384095	0.943	0.914	1.00121e-44
3	Tshz2	0.387193	0.622	0.416	1.13757e-44
3	Mpp6	0.444559	0.504	0.291	1.60632e-44
3	H3f3a1	0.33081	0.963	0.968	3.45987e-44
3	Hspb1	0.955977	0.267	0.088	4.31736e-44
3	Rbm39	0.344553	0.962	0.955	6.596e-43
3	Rtp4	0.538016	0.576	0.369	7.05811e-43
3	1500009L16Rik	0.449107	0.458	0.258	1.76717e-42
3	Cldn7	0.628163	0.802	0.677	2.13213e-42
3	Ppp1r9a	0.361239	0.402	0.203	6.88775e-41
3	1190002N15Rik	0.348442	0.39	0.192	1.57737e-40
3	Dbpht21	0.366299	0.438	0.224	3.19404e-40
3	Ncald	0.43389	0.61	0.455	1.3389e-39
3	Clic1	0.437687	0.849	0.797	1.54828e-39
3	Cpq1	0.383489	0.747	0.622	2.39427e-39
3	Pde4d1	0.309403	0.338	0.144	4.19544e-39
3	Tmed6	0.345764	0.343	0.158	9.0577e-39
3	Psma21	0.332616	0.897	0.869	1.30612e-38
3	Dync1i2	0.368226	0.739	0.617	6.86382e-38
3	Rgs7	0.333959	0.401	0.205	7.10225e-38
3	Sec62	0.343653	0.851	0.8	1.04216e-37
3	Tmem176b1	0.359056	0.908	0.888	1.39277e-37
3	Bambi1	0.389124	0.438	0.233	2.14569e-37
3	Smarca2	0.464565	0.547	0.384	3.22676e-37
3	Efhd2	0.369787	0.455	0.253	3.56638e-37
3	Morf4l1	0.269582	0.959	0.96	9.39324e-37
3	Fbxl3	0.359455	0.444	0.25	9.97456e-37
3	Efna5	0.30209	0.326	0.144	9.99879e-37
3	Dnaja1	0.471946	0.865	0.832	1.47433e-36
3	Txn1	0.255992	0.889	0.838	2.55249e-36
3	Nectin2	0.362156	0.336	0.155	5.89658e-36
3	Ly6e	0.41065	0.797	0.701	3.66261e-35
3	Zfhx3	0.369732	0.551	0.369	4.04091e-35
3	Golim4	0.403313	0.639	0.516	4.08251e-35
3	Tle11	0.399922	0.482	0.29	4.51548e-35
3	Pla2g161	0.465011	0.677	0.528	5.10869e-35
3	Adam22	0.348558	0.39	0.208	5.93169e-35
3	Cbarp	0.315124	0.399	0.214	6.2449e-35
3	Gria21	0.285106	0.332	0.142	7.71002e-35
3	Psmb8	0.53171	0.814	0.715	1.29856e-34
3	Ivns1abp	0.391451	0.685	0.569	2.46248e-34
3	Gabrb3	0.339277	0.393	0.213	6.2609e-34
3	Kcnq1ot11	0.39115	0.866	0.821	2.01439e-33
3	Ahi1	0.38976	0.611	0.452	2.16145e-33
3	Hnrnpa2b11	0.274392	0.931	0.926	2.25094e-33
3	Rbm25	0.340515	0.851	0.812	3.48036e-33
3	Pex5l	0.364058	0.47	0.293	3.92203e-33
3	Cacybp	0.361824	0.767	0.697	6.85812e-33
3	Ube2b1	0.315343	0.82	0.762	1.08722e-32
3	Ubb	0.256125	0.995	0.996	1.57769e-32
3	Prdx41	0.316233	0.521	0.328	1.79333e-32
3	Tspan31	0.359509	0.773	0.704	1.94073e-32
3	Pld31	0.370324	0.512	0.344	3.44612e-32
3	Zbp1	0.513613	0.376	0.194	4.21984e-32
3	Naa20	0.4221	0.696	0.59	4.48928e-32
3	Dnajc121	0.363206	0.707	0.576	5.17347e-32
3	Actg1	0.351488	0.994	0.991	9.85966e-32
3	Nedd4	0.372751	0.794	0.766	1.39974e-30
3	Pbx11	0.37476	0.636	0.501	3.23208e-30
3	Hprt	0.349316	0.756	0.698	1.20075e-29
3	Ndn1	0.344034	0.512	0.339	1.30404e-29
3	Cd200	0.25097	0.495	0.31	6.18487e-29
3	Tmem176a1	0.295315	0.851	0.831	6.3382e-29
3	Aplp11	0.259157	0.865	0.808	8.41328e-29
3	Gch1	0.298371	0.931	0.884	8.59968e-29
3	Psmb10	0.456541	0.797	0.726	1.28525e-28
3	Srsf31	0.269563	0.82	0.769	1.81759e-28
3	Hmgn11	0.30737	0.799	0.738	3.7702e-28
3	Ywhaq	0.25238	0.914	0.932	4.11739e-28
3	Sez6l	0.315974	0.734	0.612	4.60646e-28
3	Wnk11	0.295891	0.871	0.859	5.49178e-28
3	Son	0.278469	0.882	0.888	6.09367e-28
3	Tax1bp1	0.30178	0.883	0.877	6.25901e-28
3	Gcc2	0.393377	0.657	0.547	6.8183e-28
3	Zfp612	0.358662	0.518	0.371	7.04996e-28
3	Tnfrsf12a	0.375215	0.432	0.252	1.82434e-27
3	Icam11	0.97337	0.467	0.288	1.89312e-27
3	Map1b	0.264101	0.925	0.887	3.64012e-27
3	Tceal3	0.300048	0.41	0.248	5.51421e-27
3	Ssb	0.3192	0.802	0.767	1.16099e-26
3	Jmjd1c	0.336768	0.647	0.522	3.28314e-26
3	Nenf1	0.297976	0.851	0.849	4.17478e-26
3	Tnfsf10	0.376576	0.481	0.315	8.71632e-26
3	Spint1	0.403666	0.73	0.625	1.15591e-25
3	Mal2	0.304266	0.31	0.155	2.77735e-25
3	Rheb	0.276043	0.763	0.702	4.57833e-25
3	Bex4	0.366352	0.664	0.565	6.60942e-25
3	Fus	0.291141	0.833	0.813	8.41699e-25
3	1810037I17Rik	0.28175	0.885	0.872	1.61133e-24
3	Neurl31	0.702524	0.318	0.162	1.71281e-24
3	Sumo1	0.288701	0.833	0.81	2.05858e-24
3	Hint11	0.251689	0.908	0.934	4.09236e-24
3	Ifitm21	0.260043	0.564	0.378	4.34389e-24
3	Ptges3	0.258276	0.848	0.842	5.47561e-24
3	Rcn2	0.325397	0.559	0.433	9.94965e-24
3	Rbbp71	0.281619	0.783	0.727	1.31531e-23
3	Bclaf1	0.297286	0.788	0.768	1.45039e-23
3	Tubb51	0.351785	0.786	0.717	1.46721e-23
3	Gm451591	0.366685	0.459	0.285	1.55825e-23
3	Rab3b	0.286639	0.332	0.185	1.60139e-23
3	Lgals3bp1	0.278488	0.94	0.904	3.96561e-23
3	Srsf5	0.251322	0.846	0.832	6.10045e-23
3	Zdbf21	0.340104	0.507	0.371	8.71729e-23
3	Tpm1	0.293852	0.562	0.414	1.02855e-22
3	Rsrc2	0.336452	0.779	0.761	2.36905e-22
3	Gbp8	0.543377	0.472	0.314	4.46903e-22
3	Asap1	0.305188	0.43	0.279	5.50435e-22
3	Fndc3a	0.275098	0.891	0.875	6.05209e-22
3	Abcc8	0.273012	0.866	0.844	8.50921e-22
3	Ptprn1	0.268678	0.885	0.848	1.00666e-21
3	Hspe1	0.410351	0.886	0.873	1.80975e-21
3	Krt8	0.264772	0.777	0.707	1.83996e-21
3	Celf41	0.316105	0.601	0.478	3.8173e-21
3	Matr3	0.275001	0.808	0.782	5.63677e-21
3	Ppfibp1	0.278118	0.461	0.314	6.08018e-21
3	Igsf8	0.272582	0.339	0.2	1.07473e-20
3	Jup	0.267474	0.433	0.285	1.3267e-20
3	Nfkbia	0.625118	0.705	0.617	2.9075e-20
3	Usp291	0.295554	0.47	0.329	3.3638e-20
3	Sept7	0.290015	0.748	0.73	3.80934e-20
3	Sult1d1	0.259568	0.269	0.137	4.45138e-20
3	Cct21	0.251657	0.8	0.756	4.49941e-20
3	Sf3b1	0.269777	0.799	0.799	5.73224e-20
3	Uqcrfs1	0.265132	0.767	0.727	8.13143e-20
3	Trappc6b	0.267877	0.708	0.644	1.19985e-19
3	Cfl2	0.311432	0.621	0.524	1.82012e-19
3	Kcnk1	0.281659	0.419	0.281	2.14512e-19
3	Maff	0.319153	0.33	0.188	2.54543e-19
3	Cdh1	0.29191	0.733	0.684	4.65081e-19
3	Phip1	0.311728	0.745	0.712	4.76718e-19
3	Cbx5	0.300782	0.581	0.485	4.91457e-19
3	Lrpap1	0.317384	0.599	0.518	5.2958e-19
3	Slc6a6	0.26938	0.823	0.8	1.0356e-18
3	Arl4a	0.329283	0.542	0.431	1.51436e-18
3	Tspan15	0.287362	0.579	0.48	1.80744e-18
3	Il18bp	0.33421	0.628	0.534	1.80876e-18
3	Tuba4a	0.345526	0.645	0.58	2.72011e-18
3	Neat1	0.456251	0.934	0.931	3.77605e-18
3	Fxyd6	0.281916	0.65	0.551	4.62274e-18
3	Bag1	0.31507	0.8	0.805	6.23451e-18
3	Snu13	0.250505	0.753	0.718	1.41575e-17
3	Bbx1	0.322897	0.736	0.7	1.52768e-17
3	Khdrbs3	0.31763	0.61	0.527	2.06232e-17
3	Isg15	0.518261	0.32	0.182	2.09334e-17
3	Cldn3	0.277137	0.416	0.283	2.16659e-17
3	Nrip1	0.277917	0.561	0.442	2.18317e-17
3	Gbp9	0.404072	0.418	0.27	2.21365e-17
3	Rgs2	0.345086	0.353	0.218	3.08597e-17
3	Frmd4a	0.2827	0.406	0.271	3.14123e-17
3	Sfr1	0.280735	0.699	0.645	3.58853e-17
3	Tusc3	0.271815	0.662	0.613	4.82268e-17
3	Hmgn3	0.294607	0.763	0.714	5.50704e-17
3	Ssbp3	0.321913	0.575	0.482	6.25155e-17
3	Smc61	0.308261	0.651	0.586	6.75511e-17
3	S100a10	0.355882	0.688	0.599	1.0146e-16
3	Odc11	0.270442	0.668	0.579	1.25527e-16
3	Crem	0.370925	0.565	0.48	1.36098e-16
3	Cd44	0.273688	0.441	0.303	2.00389e-16
3	Rab11a	0.296676	0.727	0.69	2.24527e-16
3	Hnrnph1	0.261531	0.747	0.72	2.35939e-16
3	Ankrd11	0.288185	0.733	0.706	2.56854e-16
3	Tcaf1	0.279526	0.516	0.411	2.7751e-16
3	Tmc4	0.277563	0.674	0.597	3.11642e-16
3	Hgfac	0.318605	0.427	0.314	3.40228e-16
3	Srsf7	0.306762	0.644	0.581	3.40723e-16
3	Hnrnpa11	0.255495	0.747	0.702	5.41762e-16
3	Fubp1	0.256109	0.722	0.679	7.4027e-16
3	Sltm	0.250829	0.734	0.702	1.06254e-15
3	Fermt2	0.298609	0.556	0.444	1.24924e-15
3	Ssbp21	0.26573	0.445	0.318	1.64177e-15
3	Mkln1	0.272374	0.661	0.616	2.22161e-15
3	Aga	0.29811	0.704	0.68	2.93882e-15
3	Nab1	0.335442	0.548	0.448	3.46314e-15
3	Nfkb1	0.439178	0.578	0.488	3.48523e-15
3	Zfp644	0.284637	0.573	0.493	4.13706e-15
3	Cxxc5	0.278304	0.528	0.436	7.67726e-15
3	Smarca5	0.275343	0.745	0.722	8.75423e-15
3	Zfp36	0.258394	0.333	0.203	9.02678e-15
3	Myo1b1	0.291845	0.461	0.334	1.02306e-14
3	Ece1	0.256699	0.727	0.702	1.17226e-14
3	Dsp	0.272919	0.429	0.317	1.43237e-14
3	Sf3b2	0.252891	0.767	0.763	1.61585e-14
3	Atrx	0.26232	0.759	0.75	1.6893e-14
3	Hp1bp3	0.281876	0.622	0.574	3.09769e-14
3	Dusp8	0.253493	0.378	0.252	3.5845e-14
3	Gbp4	0.578211	0.524	0.397	4.83267e-14
3	Impact	0.259961	0.527	0.438	4.90126e-14
3	Sowahc1	0.261435	0.659	0.556	5.51884e-14
3	Nsmce4a	0.276231	0.538	0.451	7.11372e-14
3	Agfg1	0.284422	0.648	0.607	1.07547e-13
3	Sbno21	0.323276	0.462	0.344	1.23763e-13
3	Pigp	0.262596	0.625	0.573	1.24763e-13
3	Sat1	0.304256	0.604	0.506	2.22029e-13
3	Ifit3	0.435225	0.321	0.198	2.41159e-13
3	Fam213a	0.265853	0.453	0.347	4.19138e-13
3	Aplp2	0.274207	0.455	0.348	5.71711e-13
3	H2afv	0.250021	0.525	0.445	8.33238e-13
3	Tmbim1	0.261083	0.373	0.254	1.07967e-12
3	Gclc	0.250205	0.367	0.25	1.25513e-12
3	Dek	0.266757	0.522	0.419	1.69229e-12
3	Pak31	0.25887	0.57	0.466	2.22065e-12
3	Ralgds	0.345535	0.472	0.371	4.96676e-12
3	Ncoa7	0.255317	0.559	0.48	5.65384e-12
3	Fos	0.305438	0.384	0.264	6.87493e-12
3	Tnrc6a	0.262214	0.624	0.58	9.49466e-12
3	Tra2b	0.264812	0.697	0.663	1.37791e-11
3	Tm2d3	0.265199	0.502	0.425	1.96292e-11
3	Smap2	0.250202	0.647	0.628	2.51776e-11
3	Gbp3	0.557497	0.542	0.459	5.40821e-11
3	Irf2	0.282117	0.49	0.408	8.63643e-11
3	Ube2l6	0.259468	0.465	0.362	1.1716e-10
3	Crb3	0.260307	0.488	0.411	2.49835e-10
3	Sdc41	0.273191	0.694	0.623	5.15239e-10
3	Psmb9	0.339938	0.598	0.534	5.19396e-10
3	Rhbdl2	0.284796	0.329	0.233	1.56006e-09
3	Shisa5	0.25751	0.628	0.573	1.88971e-09
3	Ppa11	0.294757	0.73	0.722	2.67672e-09
3	Camk2d1	0.260416	0.476	0.38	3.05308e-09
3	Kmt2a1	0.263321	0.613	0.596	6.49888e-09
3	Sppl2a	0.295573	0.667	0.642	6.65867e-09
3	Slk	0.272906	0.495	0.417	7.46123e-09
3	Sbds	0.266227	0.525	0.466	8.65617e-09
3	Herc6	0.345678	0.487	0.402	1.48734e-08
3	Lmo7	0.255501	0.382	0.294	1.48839e-08
3	Vmp1	0.31101	0.693	0.68	1.77287e-08
3	Sgms2	0.26683	0.478	0.401	2.7636e-08
3	Tra2a	0.252462	0.69	0.666	3.27452e-08
3	Grpel2	0.301678	0.375	0.286	4.17212e-08
3	1110038F14Rik	0.256862	0.544	0.487	8.1672e-08
3	Pnp	0.284908	0.624	0.558	1.35636e-07
3	Cirbp	0.264108	0.618	0.605	1.46471e-07
3	Tubb4b	0.275872	0.694	0.697	1.86572e-07
3	8430408G22Rik	0.388953	0.296	0.196	2.31073e-07
3	Hs6st11	0.283344	0.501	0.437	3.14634e-07
3	Arrdc41	0.327693	0.316	0.232	3.48794e-07
3	Errfi1	0.333858	0.465	0.378	4.32359e-07
3	Sdhaf4	0.265374	0.439	0.381	4.8078e-07
3	Tap2	0.305748	0.542	0.49	5.43882e-07
3	Hspa4l	0.256399	0.455	0.386	7.4457e-07
3	Enpp2	0.255588	0.43	0.358	1.57649e-06
3	Spin11	0.250584	0.424	0.348	1.71096e-06
3	Ptp4a2	0.250749	0.759	0.771	4.32934e-06
3	Kcnk16	0.287935	0.462	0.412	5.52751e-06
3	Gbp6	0.381395	0.384	0.309	8.91235e-06
3	Runx1t1	0.257608	0.435	0.375	1.72596e-05
3	Irgm1	0.300906	0.591	0.527	2.99484e-05
3	Birc3	0.259946	0.462	0.377	4.85462e-05
3	Csf1	0.319261	0.35	0.277	6.5913e-05
3	Irf1	0.450241	0.581	0.555	0.000121407
3	Enpp4	0.263072	0.482	0.441	0.000253431
3	Tap1	0.314726	0.493	0.452	0.0012675
3	Pnmal2	0.260553	0.51	0.511	0.00193509
3	Kcnmb2	0.255948	0.456	0.444	0.00274522
3	Hspa1a	0.716236	0.275	0.217	0.0630271
3	Parp14	0.307151	0.533	0.498	0.195183
3	Cebpd1	0.277407	0.673	0.657	0.516478
3	Gbp7	0.252373	0.541	0.518	1
3	Gadd45b1	0.338327	0.359	0.316	1
3	Cldn4	0.336069	0.419	0.395	1
4	Atf5	0.862882	0.985	0.65	6.39041e-162
4	Ftl1	0.492276	0.998	0.994	1.37572e-143
4	Calr	0.616435	1	0.981	2.40128e-136
4	Angptl6	0.455039	0.535	0.142	6.10164e-136
4	Creg1	0.666629	0.982	0.8	1.04394e-133
4	Nupr1	0.978308	0.84	0.41	4.63315e-129
4	Zdhhc21	0.643143	0.961	0.721	4.39858e-116
4	Trib3	0.511267	0.566	0.174	4.39249e-114
4	Chchd10	0.883451	0.956	0.748	1.23722e-110
4	Ddit3	0.805939	0.879	0.496	3.67291e-108
4	Gnai2	0.595131	0.985	0.933	4.33657e-105
4	Hspa9	0.631194	0.974	0.812	3.79458e-103
4	Lonp1	0.551752	0.814	0.439	1.21874e-99
4	Atp2a2	0.64647	0.983	0.855	6.74951e-99
4	Rpl32	0.362819	0.998	0.998	5.81466e-97
4	Uqcrq	0.536293	0.985	0.921	2.21531e-96
4	Cd63	0.410029	1	0.986	9.43855e-88
4	Agap1	0.543058	0.836	0.54	5.69944e-85
4	Uqcc2	0.445912	0.971	0.905	1.44553e-82
4	Eif3c	0.505638	0.95	0.833	2.49492e-79
4	Krtcap2	0.468483	0.994	0.936	4.77441e-79
4	Eprs	0.541308	0.96	0.816	5.62894e-76
4	Slc3a2	0.609556	0.963	0.763	4.99863e-75
4	Ndufb9	0.449857	0.956	0.869	6.42502e-72
4	Atf4	0.475357	0.969	0.837	1.57291e-71
4	Hspa5	0.511517	1	0.983	5.88323e-71
4	Ghitm	0.572671	0.954	0.774	1.75604e-70
4	Rps8	0.308874	0.994	0.997	2.5105e-70
4	Sars	0.458481	0.925	0.747	3.6813e-69
4	Stbd1	0.291539	0.324	0.084	4.96272e-69
4	Rpl12	0.332717	0.991	0.995	1.37119e-68
4	Eef2	0.376642	0.994	0.978	2.93731e-68
4	Cox6a2	0.367551	0.263	0.059	3.23251e-68
4	Reep6	0.408602	0.59	0.279	3.39792e-67
4	Rasgrf1	0.455824	0.699	0.379	1.04434e-66
4	Aldh1l2	0.318251	0.408	0.137	1.09754e-65
4	Mthfd2	0.429551	0.82	0.498	1.02435e-64
4	Leprotl1	0.456613	0.868	0.633	1.45323e-60
4	Sel1l	0.427192	0.84	0.587	3.24439e-60
4	Naaa	0.273412	0.318	0.092	4.73591e-60
4	Rpl36	0.340761	0.989	0.988	5.96988e-59
4	Eif4ebp1	0.40516	0.744	0.415	4.44263e-57
4	Cebpg	0.415504	0.862	0.614	8.13916e-57
4	Asns	0.39195	0.853	0.607	4.39305e-56
4	Cyb5r1	0.266411	0.318	0.097	2.63639e-55
4	S100a1	0.484051	0.801	0.577	4.53569e-55
4	Igf1r1	0.568934	0.904	0.688	5.09044e-54
4	Canx	0.34199	0.996	0.94	1.61571e-53
4	Ank21	0.486951	0.864	0.62	5.62306e-53
4	Tcea1	0.40834	0.798	0.527	1.26989e-52
4	Gstm1	0.446912	0.774	0.53	9.12947e-52
4	Fau	0.252674	0.993	0.998	2.11164e-51
4	Aldoa	0.427142	0.989	0.961	2.32496e-51
4	Avpi1	0.276465	0.336	0.115	1.20796e-49
4	Aars	0.372329	0.79	0.527	1.32611e-49
4	Camk2n1	0.367792	0.974	0.881	1.52245e-49
4	Arpc5l	0.424962	0.888	0.736	1.37919e-48
4	Aes	0.325117	0.958	0.9	6.41662e-47
4	Cd1641	0.348131	0.994	0.941	3.58172e-46
4	Slc7a5	0.332946	0.597	0.334	7.33672e-46
4	Ccdc47	0.475767	0.79	0.586	2.80342e-45
4	Rnase41	0.54355	0.91	0.747	4.1681e-44
4	Derl1	0.38152	0.881	0.708	5.73229e-44
4	Rpl4	0.258574	0.994	0.989	6.22432e-44
4	Phf10	0.365521	0.583	0.318	6.44694e-44
4	Hsp90b1	0.328912	0.998	0.98	1.13273e-43
4	Insm11	0.433249	0.84	0.655	7.74439e-43
4	Atp5g1	0.32231	0.958	0.894	2.76731e-42
4	Gabarap	0.255451	0.991	0.978	1.06608e-41
4	Agpat3	0.360912	0.735	0.515	1.86363e-41
4	Enho1	0.396858	0.779	0.547	5.98488e-41
4	Ero1l1	0.507799	0.792	0.551	8.36547e-41
4	Nfe2l1	0.36332	0.851	0.68	8.75924e-41
4	Smim10l1	0.40415	0.895	0.73	9.19116e-41
4	Gtpbp2	0.382121	0.776	0.537	1.79937e-40
4	Xpot	0.315777	0.61	0.356	1.09561e-39
4	Tenm4	0.300058	0.335	0.128	1.38837e-39
4	Atp6v1g1	0.333854	0.978	0.941	3.14008e-39
4	Chka	0.571158	0.893	0.736	4.3736e-39
4	2410015M20Rik	0.311405	0.926	0.816	3.00294e-38
4	Gpx2	0.29548	0.553	0.3	8.51867e-38
4	Eif11	0.268945	0.996	0.997	1.45251e-37
4	Emb	0.323116	0.95	0.817	3.45709e-37
4	Ddrgk1	0.336005	0.807	0.633	4.32612e-37
4	Syt41	0.427246	0.91	0.739	6.64347e-37
4	Ccng1	0.409769	0.645	0.405	8.62506e-37
4	Ccnd2	0.324203	0.98	0.894	1.4807e-36
4	Vegfa	0.348126	0.882	0.722	3.88376e-36
4	Vegfb	0.267844	0.583	0.343	1.77998e-35
4	Mif	0.419226	0.974	0.907	2.19348e-35
4	Gng5	0.302925	0.987	0.953	2.84129e-35
4	Gpx4	0.317906	0.943	0.878	4.157e-35
4	Pdia6	0.287764	0.987	0.933	5.34204e-35
4	Vapb	0.317766	0.833	0.672	7.25903e-35
4	Golga4	0.337544	0.958	0.846	2.33091e-34
4	Eif5	0.353306	0.98	0.928	4.50486e-34
4	Hint3	0.3255	0.717	0.499	7.02419e-34
4	Gns	0.312424	0.919	0.775	1.49703e-33
4	Tmem238	0.283964	0.649	0.423	2.49132e-33
4	Gch11	0.2808	0.967	0.882	3.79377e-33
4	AC078895.1	0.357237	0.855	0.633	6.03583e-33
4	Ndufv3	0.291722	0.903	0.792	6.40164e-33
4	Acly1	0.290049	0.994	0.908	1.09992e-32
4	Cox6a1	0.303318	0.95	0.878	1.29691e-32
4	Rsrp1	0.318393	0.972	0.883	1.39251e-32
4	Herpud1	0.312861	0.928	0.814	1.98309e-32
4	Sdf2l11	0.375547	0.864	0.684	2.06961e-32
4	Psph	0.265835	0.458	0.234	3.09833e-32
4	Ang1	0.387993	0.805	0.603	4.60649e-32
4	Rabac1	0.269514	0.956	0.872	6.54099e-32
4	Pebp1	0.25656	0.974	0.936	7.44482e-32
4	Snd1	0.339577	0.744	0.567	7.93572e-32
4	Dnajc3	0.291758	0.969	0.902	8.6544e-32
4	Bace21	0.306389	0.904	0.66	9.70647e-32
4	P4hb1	0.30327	0.969	0.879	1.00849e-31
4	Atp6v0e	0.27674	0.978	0.931	1.27645e-31
4	Ndufa2	0.264246	0.958	0.888	2.58565e-31
4	Sec11c	0.293398	0.932	0.864	3.72868e-31
4	Disp2	0.314167	0.767	0.575	5.68348e-31
4	Ndufb10	0.32269	0.899	0.796	8.75117e-31
4	Cttnbp21	0.34954	0.649	0.424	2.59529e-30
4	Gsdma1	0.319046	0.79	0.561	3.39945e-30
4	Gm10076	0.273168	0.892	0.77	7.55051e-30
4	Gars	0.312563	0.831	0.689	9.97127e-30
4	Cyfip2	0.295496	0.84	0.648	1.12216e-29
4	Krt7	0.316299	0.868	0.719	2.28311e-29
4	Map1b1	0.291132	0.963	0.885	2.4342e-29
4	Tmem65	0.316376	0.789	0.607	3.87289e-29
4	1810008I18Rik	0.269875	0.461	0.258	4.13232e-29
4	Slc20a1	0.359325	0.456	0.246	5.26955e-29
4	Tram1	0.269513	0.945	0.866	7.4502e-29
4	H2afj	0.29598	0.879	0.781	8.69101e-29
4	Tmem147	0.282634	0.82	0.634	9.85173e-29
4	Fam171b	0.316485	0.438	0.235	1.13355e-28
4	Rnf1301	0.275708	0.888	0.77	1.72713e-28
4	Prnp	0.314112	0.938	0.818	3.11862e-28
4	Sqstm1	0.358162	0.926	0.776	5.01251e-28
4	Tmbim6	0.303847	0.982	0.926	5.07018e-28
4	Pcbp2	0.270134	0.967	0.908	5.69182e-28
4	Tmed2	0.266473	0.976	0.938	8.62446e-28
4	Acot13	0.280077	0.653	0.456	1.57891e-27
4	Man1a	0.32838	0.684	0.474	1.9369e-27
4	Bri3	0.300698	0.91	0.795	2.06512e-27
4	Dynll2	0.273431	0.93	0.834	6.67981e-27
4	Slc25a39	0.276528	0.803	0.658	6.71341e-27
4	Sod1	0.288765	0.862	0.723	1.52639e-26
4	Hadh1	0.316299	0.82	0.61	1.81643e-26
4	Esrp1	0.30735	0.608	0.41	2.18009e-26
4	Arhgef2	0.307276	0.531	0.325	2.29584e-26
4	Ghr	0.296677	0.789	0.587	2.46992e-26
4	Ndufa5	0.305752	0.798	0.618	2.76489e-26
4	Sys1	0.278085	0.829	0.692	3.5174e-26
4	Timm13	0.279267	0.835	0.705	4.04194e-26
4	Sqle	0.309117	0.732	0.551	6.77848e-26
4	Eef1d	0.272719	0.928	0.845	1.06914e-25
4	Csde1	0.264114	0.978	0.904	1.17039e-25
4	Mettl7a11	0.266198	0.557	0.352	2.7125e-25
4	Hyou1	0.298654	0.785	0.622	2.81577e-25
4	Fam210b	0.302284	0.577	0.374	3.22992e-25
4	Vti1b	0.300704	0.783	0.618	9.29142e-25
4	Edem11	0.267364	0.783	0.589	1.15006e-24
4	Mars	0.251245	0.575	0.379	2.83316e-24
4	Fuom	0.276561	0.722	0.54	3.08881e-24
4	Mia3	0.267429	0.875	0.741	3.50302e-24
4	Creld2	0.298255	0.737	0.559	3.93055e-24
4	Mien1	0.27421	0.858	0.737	4.45689e-24
4	Taf15	0.305132	0.636	0.446	5.37683e-24
4	0610012G03Rik	0.259364	0.658	0.47	6.36905e-24
4	Rps27l1	0.282347	0.976	0.913	9.44412e-24
4	Atox1	0.286901	0.882	0.749	1.39006e-23
4	Ddx17	0.260811	0.853	0.713	1.53463e-23
4	Jade1	0.273855	0.676	0.475	1.76009e-23
4	Bax1	0.284114	0.86	0.721	2.21179e-23
4	Chchd1	0.274988	0.831	0.689	3.58935e-23
4	Bex21	0.278748	0.961	0.884	4.4125e-23
4	Spcs3	0.27605	0.892	0.762	1.22705e-22
4	Tor1b	0.265422	0.697	0.519	1.25086e-22
4	Mrpl23	0.269614	0.776	0.615	1.26398e-22
4	Wls	0.275279	0.765	0.599	1.45304e-22
4	Magt1	0.25576	0.908	0.761	1.99967e-22
4	Vldlr	0.287548	0.574	0.375	2.40854e-22
4	Scgn	0.267988	0.746	0.561	2.7979e-22
4	Cuta	0.268948	0.739	0.566	5.47783e-22
4	Mrpl30	0.304174	0.794	0.662	1.74327e-21
4	Strbp	0.271949	0.631	0.441	1.78837e-21
4	Zfp106	0.254891	0.746	0.578	4.49588e-21
4	Sdk2	0.275042	0.592	0.414	1.10804e-20
4	Cyc1	0.261576	0.757	0.603	1.11767e-20
4	Ndufs7	0.278567	0.772	0.641	1.60296e-20
4	Luc7l2	0.255326	0.969	0.892	8.98836e-20
4	Vdac1	0.269484	0.743	0.585	1.39512e-19
4	Pdia4	0.27054	0.794	0.665	2.02107e-19
4	Prrc2b	0.255332	0.763	0.623	3.22266e-19
4	Atf6	0.250564	0.665	0.505	4.92326e-19
4	Nabp1	0.253179	0.432	0.257	5.95401e-19
4	Madd	0.262967	0.664	0.506	9.25288e-19
4	Rora	0.324164	0.686	0.532	9.58961e-19
4	Arl8b	0.250475	0.783	0.631	1.98876e-18
4	Wnt41	0.326968	0.744	0.552	2.7046e-18
4	Faf1	0.250991	0.546	0.38	3.36891e-18
4	Atp6v1a	0.279522	0.838	0.702	1.61422e-17
4	Saraf	0.253298	0.91	0.837	4.04231e-17
4	Lpl1	0.293792	0.812	0.665	1.29997e-16
4	Glul1	0.255299	0.915	0.789	1.66851e-16
4	Snx10	0.291087	0.903	0.791	1.96721e-16
4	Selenow	0.274014	0.759	0.627	3.19886e-16
4	Gpi1	0.253032	0.864	0.747	4.78208e-16
4	Bnip3	0.368608	0.744	0.601	2.59774e-15
4	BC005537	0.250104	0.829	0.712	5.25114e-15
4	Pfkl	0.251162	0.649	0.504	1.80968e-14
4	Slc7a14	0.251135	0.844	0.718	3.05267e-14
4	Mcrip1	0.258002	0.695	0.566	5.5384e-14
4	Zfp91	0.265852	0.801	0.682	1.32861e-13
5	Hspa1b	1.93085	0.647	0.151	6.23665e-215
5	Hspa1a1	2.15763	0.689	0.188	8.80499e-201
5	Hsph1	1.34843	0.74	0.493	3.93478e-98
5	Dnajb1	1.23483	0.586	0.279	8.80627e-82
5	Hspe11	0.846857	0.877	0.874	2.44246e-72
5	Hspb11	0.964193	0.326	0.087	3.40188e-68
5	Rpl10	0.380991	0.994	0.999	4.959e-67
5	Hsp90aa11	0.824492	0.932	0.986	2.81798e-61
5	Rpl9	0.323798	0.983	0.998	3.47756e-51
5	Rps14	0.306801	0.989	0.998	7.67949e-48
5	Hsp90ab11	0.44278	0.964	0.994	1.41558e-41
5	Eif12	0.37315	0.985	0.998	1.42279e-41
5	Rpl171	0.332889	0.987	0.998	6.2211e-41
5	Ubb1	0.388689	0.987	0.996	6.4068e-40
5	Cox7a2l	0.386799	0.922	0.934	1.68659e-39
5	Dnaja11	0.890532	0.822	0.836	1.78034e-39
5	Rpl111	0.279464	0.989	0.996	2.8391e-36
5	Fau1	0.290514	0.987	0.999	8.8835e-36
5	Rpl391	0.388554	0.97	0.995	7.80831e-35
5	Rps27	0.384553	0.979	0.997	2.54605e-34
5	Tpt11	0.260637	0.998	1	7.78249e-34
5	Rpl37a	0.302999	0.973	0.997	3.70911e-33
5	Rplp01	0.291875	0.983	0.997	3.23292e-32
5	Rpl381	0.334312	0.977	0.992	1.24229e-31
5	Rpl301	0.285614	0.985	0.999	8.29148e-30
5	Rpl3	0.286649	0.979	0.997	2.0134e-29
5	Rpl37	0.342635	0.975	0.993	3.81388e-29
5	Naca1	0.330442	0.951	0.983	2.96885e-28
5	Rpl341	0.301438	0.983	0.996	3.17291e-28
5	Rps6	0.261564	0.987	0.998	2.0148e-27
5	Rps181	0.279443	0.979	0.997	3.1644e-27
5	Rps211	0.302155	0.989	0.997	5.37059e-27
5	Bnip31	0.606597	0.691	0.605	5.0183e-26
5	Hadh2	0.365603	0.778	0.614	1.11714e-25
5	Ddit31	0.748075	0.657	0.513	2.83134e-25
5	Rpl361	0.345536	0.96	0.99	6.82191e-24
5	Rpl35a1	0.259492	0.985	0.997	1.78627e-23
5	Mif1	0.489474	0.863	0.915	2.67456e-23
5	Rps5	0.251996	0.975	0.996	1.27328e-22
5	Aldoa1	0.402134	0.896	0.968	6.84571e-22
5	Eif4a2	0.291032	0.896	0.931	1.60294e-21
5	Bex31	0.306136	0.92	0.923	5.46759e-21
5	Mt11	0.343272	0.935	0.912	6.11412e-21
5	Selenok	0.335069	0.956	0.976	1.24162e-20
5	Btf31	0.378258	0.918	0.95	2.57316e-20
5	Rsrp11	0.511941	0.833	0.893	2.7741e-20
5	Krt18	0.272117	0.822	0.81	2.97888e-20
5	Nudc	0.470897	0.734	0.718	1.07538e-19
5	Krtcap21	0.30221	0.911	0.942	6.90951e-19
5	Cox7c1	0.283237	0.924	0.963	1.75084e-18
5	Cpe1	0.334869	0.968	0.953	2.19731e-18
5	Uqcc21	0.313434	0.86	0.914	2.22556e-17
5	Rpl24	0.266589	0.973	0.993	8.7035e-17
5	Tpi1	0.387853	0.789	0.826	2.185e-16
5	Swt1	0.4365	0.452	0.317	6.02692e-16
5	Pfdn5	0.26173	0.941	0.971	8.15645e-16
5	Cacybp1	0.472381	0.719	0.702	1.19765e-15
5	Atp5g21	0.262495	0.92	0.952	2.38893e-15
5	Hspa8	0.323294	0.954	0.99	5.80216e-15
5	Creg11	0.293395	0.818	0.813	9.91814e-14
5	Trpm51	0.366703	0.469	0.344	2.88713e-13
5	Srsf11	0.408953	0.738	0.761	6.57172e-13
5	Mt21	0.251992	0.839	0.745	2.54605e-12
5	Ndufb101	0.311025	0.789	0.804	2.18885e-11
5	Gpi11	0.3834	0.721	0.758	8.5958e-11
5	Gapdh	0.310438	0.924	0.979	1.50086e-10
5	St13	0.291401	0.736	0.746	1.92192e-10
5	Trp53inp1	0.385257	0.383	0.269	4.24119e-10
5	Gm42418	0.286665	0.989	0.998	6.88812e-10
5	Ndufb91	0.280475	0.824	0.879	2.15055e-09
5	Slc30a81	0.293559	0.767	0.704	4.63878e-09
5	Ankrd33b	0.350914	0.391	0.287	9.28535e-09
5	Rps28	0.257795	0.898	0.972	1.15775e-08
5	Tmem651	0.290671	0.662	0.617	1.69694e-08
5	P4ha1	0.319855	0.594	0.522	1.70461e-08
5	Sec22b	0.293019	0.71	0.721	2.41422e-08
5	Arpc5l1	0.329237	0.732	0.748	4.61144e-08
5	Aimp1	0.30589	0.634	0.603	1.13151e-07
5	Ctnnbip1	0.279264	0.436	0.342	1.42679e-07
5	Mien11	0.295904	0.729	0.747	1.57104e-07
5	Zfp622	0.332509	0.509	0.447	1.71541e-07
5	Sec11c1	0.251519	0.843	0.871	2.01218e-07
5	Pgam1	0.258967	0.822	0.902	3.99574e-07
5	Rtraf	0.271795	0.738	0.769	6.43386e-07
5	Eif3h	0.256094	0.801	0.846	1.20206e-06
5	Dynll21	0.26876	0.799	0.844	1.20705e-06
5	2900093K20Rik	0.300094	0.271	0.184	1.35061e-06
5	Paip21	0.27598	0.784	0.821	1.83252e-06
5	Gdi2	0.250334	0.795	0.848	2.79244e-06
5	Ccnl1	0.329288	0.556	0.505	3.44274e-06
5	Uqcrb	0.277443	0.839	0.921	3.77518e-06
5	Ahsa1	0.303871	0.49	0.444	5.4825e-06
5	Vapb1	0.277616	0.674	0.684	3.33767e-05
5	Fam162a	0.376875	0.533	0.486	3.61669e-05
5	Rgs21	0.311538	0.315	0.223	6.44918e-05
5	Gm26917	0.290181	0.465	0.405	0.000144054
5	Dnaja4	0.319042	0.465	0.416	0.000147461
5	Bex41	0.260236	0.602	0.571	0.000367205
5	Mrpl301	0.262772	0.666	0.671	0.00037705
5	Ubc	0.293124	0.899	0.976	0.00103726
5	Sytl41	0.271928	0.484	0.427	0.00213289
5	Hspd1	0.314478	0.712	0.793	0.00477976
5	Pdap1	0.270047	0.664	0.69	0.0103906
5	Vdac11	0.321491	0.588	0.597	0.0107463
5	Bex11	0.253684	0.509	0.475	0.0171701
5	Hspa4l1	0.277268	0.433	0.388	0.0612237
5	Saraf1	0.257579	0.772	0.847	0.0748887
5	Dctn3	0.25258	0.647	0.678	0.0792231
5	Strap	0.289859	0.605	0.622	0.16451
5	Rragd	0.250661	0.383	0.344	0.720515
5	Ero1l2	0.366457	0.565	0.568	0.778641
5	Txnip1	0.286886	0.406	0.362	1
5	Bcas2	0.263005	0.655	0.71	1
5	Arl4a1	0.284733	0.457	0.439	1
5	Ifrd1	0.268112	0.417	0.398	1
6	Gmnn	0.462109	0.837	0.028	0
6	Ins12	0.486901	0.998	0.967	4.81047e-39
6	Mafa2	0.524629	0.744	0.429	1.78221e-37
6	Ins22	0.425898	1	0.998	3.26176e-36
6	Ppp1r1a1	0.406243	0.823	0.521	1.05885e-35
6	Ucn31	0.297883	0.658	0.372	3.07845e-28
6	Ociad21	0.294811	0.84	0.58	8.65748e-26
6	Ttc281	0.265776	0.642	0.37	1.63763e-25
6	Prlr1	0.254695	0.688	0.409	5.07041e-25
6	Ero1lb2	0.303734	0.923	0.696	1.246e-24
6	Fam151a1	0.26509	0.763	0.48	3.53872e-23
6	Hadh3	0.277956	0.851	0.612	7.10105e-22
6	Nkx6-11	0.256397	0.795	0.545	1.04537e-20
6	AC078895.11	0.256312	0.905	0.633	1.14402e-19
6	Wnt42	0.293669	0.788	0.552	4.02484e-19
6	Atp2a21	0.27089	0.97	0.858	8.02496e-18
6	Iapp2	0.266452	0.993	0.989	8.87847e-18
7	Nos2	1.44917	0.78	0.174	2.0212e-212
7	Il4i11	1.13518	0.697	0.135	1.07689e-211
7	Gbp5	1.06703	0.859	0.246	7.24718e-195
7	Ripk2	0.808697	0.845	0.25	7.02567e-179
7	Tnfaip3	0.865656	0.716	0.169	7.53198e-179
7	Icam12	1.02489	0.881	0.27	4.6872e-175
7	Cd40	0.790325	0.687	0.156	5.58699e-174
7	Gm16685	0.48297	0.477	0.083	3.3886e-142
7	Birc31	0.77878	0.909	0.354	7.33161e-137
7	Clic4	0.968681	0.981	0.671	9.08635e-137
7	Tlr2	0.710846	0.831	0.316	2.83047e-134
7	Cxcl10	1.32431	0.728	0.234	6.27083e-129
7	Sod21	0.91603	0.983	0.817	1.94892e-127
7	Plscr1	0.846934	0.838	0.384	1.46743e-122
7	Steap41	0.804429	0.792	0.252	1.20712e-121
7	Defb11	1.01306	0.95	0.484	2.05032e-120
7	Ehd1	0.753373	0.819	0.346	1.31173e-119
7	AW112010	1.26319	0.716	0.272	4.57955e-107
7	Acod1	0.745176	0.384	0.07	9.79449e-107
7	Tifa1	0.808497	0.697	0.243	5.41093e-100
7	Pabpc11	0.651125	0.998	0.943	1.92555e-98
7	Ikbke	0.562825	0.527	0.15	3.34422e-98
7	Nfkbia1	0.827126	0.943	0.606	4.55756e-98
7	Csf11	0.7547	0.68	0.26	6.09925e-96
7	Snx101	0.633066	0.986	0.788	9.93538e-92
7	Sqstm11	0.735347	0.962	0.777	7.84679e-90
7	Cfb	0.338822	0.344	0.065	5.37929e-89
7	Slc2a6	0.253383	0.274	0.043	6.26766e-89
7	Rassf4	0.553667	0.649	0.25	2.67377e-87
7	Glul2	0.635122	0.99	0.787	1.57288e-85
7	Ccrl2	0.46401	0.551	0.174	7.04334e-82
7	Litaf	0.504719	0.874	0.399	1.38595e-81
7	Lacc1	0.348845	0.489	0.138	2.74629e-81
7	8430408G22Rik1	0.700693	0.568	0.184	1.04432e-79
7	Gsap	0.448845	0.68	0.264	3.41041e-79
7	Fmnl2	0.527208	0.878	0.503	1.78238e-78
7	Gbp2	0.783818	0.947	0.544	5.06292e-77
7	Pnp1	0.596386	0.862	0.546	1.40535e-74
7	Stat3	0.490014	0.981	0.85	3.85722e-71
7	Upp1	0.710415	0.84	0.577	4.84249e-70
7	Glipr2	0.25928	0.279	0.054	1.89478e-69
7	Gbp41	0.774067	0.792	0.385	2.44511e-69
7	Cebpd2	0.564359	0.979	0.64	3.14347e-69
7	Pnrc11	0.623451	0.962	0.733	4.84945e-69
7	Mt22	0.749245	0.962	0.739	9.88076e-69
7	Spint11	0.576738	0.883	0.62	4.93057e-65
7	Ralgds1	0.471566	0.728	0.36	1.16159e-64
7	Cxcl11	0.495705	0.449	0.139	1.25932e-61
7	Ccl21	0.43311	0.465	0.148	3.66727e-60
7	Serpina10	0.46467	0.971	0.815	1.10464e-57
7	Isg201	0.490464	0.974	0.83	2.32133e-57
7	Gadd45b2	0.348602	0.683	0.299	6.11789e-57
7	Enpp41	0.446126	0.768	0.426	1.62492e-56
7	Atf51	0.53813	0.94	0.658	2.12629e-56
7	Samd9l	0.409418	0.814	0.444	7.05225e-56
7	Cldn71	0.493138	0.909	0.675	5.61529e-55
7	Cpeb4	0.512232	0.85	0.579	1.0361e-54
7	Chrm3	0.352561	0.525	0.218	9.71481e-54
7	Cgn	0.396487	0.788	0.428	2.886e-53
7	Lyn	0.275982	0.379	0.112	4.84256e-53
7	Sept91	0.43248	0.874	0.568	5.70981e-53
7	Susd6	0.436139	0.79	0.45	2.6127e-52
7	Fas1	0.267648	0.456	0.15	2.8663e-52
7	Psme21	0.420554	0.981	0.89	3.50909e-52
7	Nfkbiz	0.440618	0.809	0.451	3.82214e-52
7	Slc11a2	0.3873	0.644	0.307	5.16734e-52
7	Lix1l	0.356126	0.585	0.252	1.61683e-51
7	Chac1	0.394425	0.542	0.221	2.26661e-51
7	Mt12	0.509922	0.993	0.909	2.94806e-51
7	Apobec3	0.394886	0.79	0.43	4.62667e-51
7	Ptp4a1	0.566662	0.902	0.666	1.2127e-50
7	Dgkg1	0.391015	0.542	0.23	9.84742e-50
7	Sppl2a1	0.389474	0.876	0.631	7.80358e-49
7	Casp3	0.308814	0.549	0.225	1.8202e-48
7	Gbp81	0.470424	0.642	0.31	8.8582e-48
7	Nfkb11	0.455517	0.776	0.479	1.21875e-47
7	Orai2	0.299204	0.43	0.155	1.49323e-47
7	Ext1	0.353918	0.632	0.308	2.3998e-47
7	Pde1c	0.400951	0.768	0.448	8.5093e-47
7	Cxcl16	0.345636	0.597	0.277	1.02285e-46
7	Ly96	0.365306	0.616	0.291	1.17815e-46
7	Pfkp1	0.374971	0.888	0.571	3.1466e-46
7	Atf41	0.401066	0.967	0.839	1.20296e-45
7	Elf3	0.422945	0.735	0.412	2.0108e-45
7	Klf5	0.381578	0.585	0.271	2.78148e-45
7	Eif6	0.364194	0.909	0.684	3.97951e-45
7	Pfkfb3	0.439498	0.632	0.303	5.23162e-45
7	Itgav	0.44776	0.797	0.52	8.65571e-45
7	Gbp31	0.52777	0.792	0.448	1.32109e-44
7	St3gal1	0.312199	0.475	0.192	1.84318e-44
7	Ghitm1	0.398576	0.928	0.779	1.64589e-43
7	Znrf11	0.353556	0.752	0.426	3.75859e-43
7	Clic5	0.275546	0.446	0.17	1.25181e-42
7	Dtx3l	0.430546	0.706	0.402	1.83552e-42
7	Parp141	0.611609	0.745	0.487	5.72686e-42
7	Fam129a	0.307834	0.337	0.109	8.24494e-42
7	Rab7	0.362365	0.969	0.869	9.48553e-42
7	Dock10	0.256905	0.358	0.12	9.77313e-42
7	Cd82	0.35186	0.706	0.394	1.18542e-41
7	2810474O19Rik	0.452413	0.831	0.558	2.5231e-41
7	Tapbpl	0.389582	0.809	0.541	2.89821e-41
7	Tnip1	0.295845	0.539	0.241	4.37365e-41
7	Gbp91	0.4236	0.58	0.266	5.83984e-41
7	Hspa81	0.386014	0.998	0.987	7.65817e-41
7	Marcks1	0.460136	0.902	0.719	7.57545e-40
7	Cd2ap	0.377593	0.878	0.634	1.11755e-39
7	Ccl281	0.287431	0.446	0.179	1.71076e-39
7	Atp6v1a1	0.369621	0.902	0.701	2.29714e-39
7	Itgb8	0.330795	0.496	0.222	3.75403e-39
7	Plxnb2	0.389168	0.89	0.698	4.26517e-39
7	Arid5a	0.253473	0.461	0.184	5.29156e-39
7	Cdcp1	0.341205	0.644	0.332	6.98237e-39
7	Nars	0.388395	0.845	0.637	1.93146e-38
7	Etv6	0.274239	0.568	0.267	2.31972e-38
7	Gbp61	0.323814	0.621	0.298	9.34432e-38
7	Wars1	0.55241	0.811	0.597	3.98101e-37
7	Psmb101	0.358624	0.938	0.72	4.98026e-37
7	Cdc42se2	0.323608	0.735	0.461	8.0165e-37
7	Optn	0.250468	0.418	0.172	7.20027e-36
7	Neurl32	0.414387	0.415	0.161	8.43493e-36
7	Tapbp	0.332566	0.964	0.858	1.39629e-35
7	Eif4ebp11	0.326371	0.73	0.422	6.53997e-35
7	Tnfrsf11b	0.283119	0.344	0.121	1.49308e-34
7	Chka1	0.485077	0.883	0.74	2.12262e-34
7	Slc39a1	0.29344	0.592	0.308	2.78435e-33
7	Mthfd21	0.371503	0.757	0.507	1.78953e-32
7	Lcn2	0.469363	0.337	0.123	5.3031e-32
7	Ins23	0.416159	1	0.998	5.91033e-32
7	Sowahc2	0.330144	0.821	0.55	7.36991e-32
7	Raph1	0.315154	0.468	0.213	9.25728e-32
7	Herc61	0.393481	0.666	0.395	2.29415e-31
7	Gna13	0.324638	0.771	0.536	3.79932e-31
7	Rchy1	0.282107	0.797	0.559	7.45514e-31
7	Cebpg1	0.332554	0.833	0.62	1.16749e-30
7	Nfkbib	0.285917	0.516	0.264	1.63409e-30
7	Creb3	0.319083	0.788	0.557	1.93641e-30
7	Zfp598	0.301628	0.535	0.284	2.25117e-30
7	Mvp	0.309068	0.821	0.598	6.18365e-30
7	Ctnnb1	0.27934	0.986	0.88	7.25614e-30
7	Pdzk1ip11	0.373394	0.616	0.366	1.01182e-29
7	Clint1	0.30585	0.823	0.599	1.71127e-29
7	Ptpn2	0.322416	0.649	0.392	1.71418e-29
7	Tmc41	0.312871	0.804	0.592	1.75483e-29
7	Anxa7	0.318051	0.84	0.643	2.44666e-29
7	Stxbp1	0.312298	0.897	0.753	2.12523e-28
7	Isg151	0.441171	0.415	0.181	4.99191e-28
7	Tap21	0.319881	0.716	0.482	5.88284e-28
7	Tnfaip2	0.346055	0.286	0.102	6.43064e-27
7	Hivep3	0.315595	0.704	0.482	3.60562e-26
7	Gtpbp21	0.331249	0.754	0.542	3.92917e-26
7	Lrrn11	0.318297	0.709	0.471	5.44959e-26
7	Slc3a21	0.255999	0.919	0.769	1.95732e-25
7	Igfals	0.272081	0.463	0.25	4.37066e-25
7	Asns1	0.31136	0.795	0.614	7.83711e-25
7	Entpd31	0.297888	0.764	0.524	1.29985e-24
7	Frk	0.278038	0.504	0.275	1.78036e-24
7	Ninj1	0.278529	0.79	0.62	3.01366e-24
7	Jak2	0.253165	0.52	0.286	3.35392e-24
7	Parp9	0.312133	0.706	0.45	4.48674e-24
7	Mast4	0.327378	0.838	0.678	8.08484e-24
7	Znfx1	0.33611	0.637	0.421	1.76154e-23
7	Tnfaip8	0.30103	0.542	0.307	1.90097e-23
7	Gpx11	0.272591	0.888	0.72	1.96331e-23
7	St5	0.300541	0.563	0.353	2.79395e-23
7	Herpud11	0.30192	0.947	0.814	3.20167e-23
7	Rnf14	0.292201	0.811	0.639	1.81221e-22
7	Atp11a	0.260575	0.587	0.355	1.56082e-21
7	Fam102a	0.258328	0.685	0.481	2.29935e-21
7	Pde4b	0.302049	0.609	0.4	3.00036e-21
7	Oasl2	0.313736	0.613	0.362	3.22368e-21
7	Sars1	0.264745	0.895	0.751	3.27964e-21
7	Tubb3	0.287033	0.458	0.249	1.09262e-20
7	Msmo1	0.290782	0.759	0.576	1.97616e-20
7	Gsr	0.265977	0.742	0.527	2.60081e-20
7	Jak1	0.256386	0.869	0.727	1.10691e-19
7	Steap2	0.290473	0.504	0.299	1.17829e-19
7	March5	0.250532	0.842	0.724	2.16659e-19
7	Gfpt11	0.28245	0.947	0.828	2.44004e-19
7	Hspa91	0.260152	0.919	0.818	2.44274e-19
7	Fuom1	0.267572	0.733	0.543	5.08465e-19
7	Gsdma2	0.259201	0.795	0.564	5.91216e-19
7	Gpcpd1	0.264803	0.527	0.328	1.02783e-18
7	Sephs2	0.314896	0.594	0.411	1.32322e-18
7	Larp4b	0.267741	0.814	0.65	1.42922e-18
7	Rars	0.251041	0.654	0.463	2.69947e-18
7	Tubb2a	0.316772	0.671	0.493	4.99462e-18
7	Errfi11	0.274999	0.592	0.374	5.77167e-18
7	Mocs2	0.253702	0.773	0.627	8.44498e-18
7	Ptp4a21	0.254244	0.878	0.763	3.7297e-17
7	Syt7	0.253343	0.852	0.681	8.79143e-17
7	Grk3	0.262293	0.754	0.589	3.45841e-16
7	Cflar	0.279463	0.716	0.558	3.96195e-16
7	Slc20a11	0.257897	0.439	0.25	1.36642e-15
7	Prr13	0.286639	0.783	0.67	1.40035e-14
7	Irf11	0.331592	0.706	0.548	1.91202e-14
7	Cd274	0.301388	0.63	0.42	7.19388e-14
7	Ins13	0.279868	1	0.967	1.38488e-13
7	Pik3c2a	0.258832	0.666	0.528	1.29051e-11
7	Ifit1	0.609364	0.511	0.343	2.09746e-10
7	Fam20c	0.272162	0.632	0.513	2.83718e-10
7	Nupr11	0.271516	0.616	0.43	3.64731e-10
7	C2cd4b1	0.251212	0.776	0.614	3.12836e-09
7	Rsad2	0.939055	0.284	0.165	1.57796e-07
7	Rgs42	0.270637	0.621	0.495	4.68197e-07
7	Crybb31	0.379207	0.418	0.342	1
7	Cmpk2	0.395944	0.265	0.206	1
7	H2afz	0.265699	0.924	0.938	1
7	Ifit31	0.466907	0.253	0.206	1
8	Chga	0.888382	1	0.95	1.93206e-145
8	Chgb1	0.790932	1	0.934	2.06323e-70
8	Iapp3	0.514801	1	0.988	1.04138e-69
8	Tmem272	0.454981	1	0.883	8.80508e-66
8	Cd812	0.451123	0.825	0.419	5.86907e-56
8	AC078895.12	0.531941	0.89	0.634	5.38152e-50
8	Folr11	0.36312	0.41	0.146	3.75192e-47
8	Fxyd31	0.274306	0.396	0.13	8.97431e-47
8	Resp182	0.447797	0.995	0.905	1.04517e-46
8	Tspan81	0.325675	0.588	0.249	5.7972e-45
8	Hist1h1c1	0.557533	0.818	0.604	1.97819e-41
8	Fam159b1	0.491378	0.825	0.592	8.8876e-39
8	Peg32	0.478361	0.957	0.868	5.47359e-38
8	Bace22	0.41276	0.892	0.665	2.9358e-37
8	Syt71	0.424883	0.871	0.68	4.83396e-37
8	Kcnk161	0.514534	0.647	0.403	8.32094e-36
8	Sult1d11	0.264516	0.362	0.136	6.02348e-35
8	Nkx6-12	0.447404	0.811	0.544	6.09039e-34
8	Pcsk1n1	0.331717	0.998	0.938	1.21687e-33
8	Cplx2	0.414356	0.688	0.474	7.26041e-33
8	Hist1h2bc	0.421281	0.83	0.668	6.17721e-32
8	Fxyd61	0.405168	0.758	0.548	3.78809e-31
8	Hist3h2ba1	0.289232	0.333	0.125	3.84302e-31
8	Lpgat1	0.415404	0.698	0.506	1.11103e-29
8	Selenop1	0.416801	0.94	0.835	1.94806e-29
8	Hap11	0.384466	0.729	0.518	1.82997e-28
8	Scg3	0.292225	0.993	0.913	9.54452e-28
8	Cadps	0.345035	0.669	0.438	1.00652e-27
8	Mlxipl1	0.367051	0.616	0.397	1.80442e-26
8	Sez6l1	0.390214	0.818	0.611	1.8471e-26
8	Cd441	0.392165	0.54	0.302	2.54933e-26
8	Serping12	0.413904	0.859	0.682	3.6715e-25
8	Vat1l	0.26781	0.492	0.26	4.37702e-25
8	Dio1	0.32043	0.719	0.504	5.41844e-25
8	Pclo	0.351409	0.767	0.548	4.94703e-24
8	Gmpr	0.342948	0.616	0.427	4.48518e-23
8	Id2	0.410195	0.659	0.432	1.65074e-22
8	Il1r11	0.341513	0.868	0.709	3.13105e-22
8	Chic1	0.328678	0.811	0.655	4.73446e-22
8	Syt13	0.312851	0.911	0.76	2.48408e-21
8	Rnf150	0.310151	0.441	0.242	1.4086e-20
8	Tsc22d1	0.344627	0.871	0.742	1.79379e-20
8	Scnn1b1	0.303703	0.765	0.581	1.01047e-19
8	Cd1642	0.280295	0.998	0.942	1.50726e-19
8	Slc7a141	0.266802	0.849	0.72	1.27926e-18
8	Acly2	0.267446	0.99	0.909	1.42428e-18
8	Gjd2	0.311925	0.465	0.284	5.40701e-18
8	Elavl4	0.308356	0.535	0.338	6.16654e-18
8	Gpc4	0.257713	0.631	0.436	6.16685e-18
8	Pax6	0.274793	0.887	0.777	1.41211e-17
8	Zbtb202	0.25345	0.928	0.846	3.82198e-17
8	Hist1h1d	0.252123	0.293	0.137	3.8442e-17
8	Lgals3bp2	0.257733	0.978	0.903	4.58318e-17
8	Cxxc4	0.294149	0.588	0.409	9.8325e-17
8	Rab37	0.255447	0.537	0.359	2.39495e-16
8	Atp8b1	0.283698	0.779	0.637	2.66396e-16
8	Ucp2	0.251231	0.799	0.675	4.62036e-16
8	Pigr	0.47061	0.365	0.199	4.92858e-16
8	St18	0.297058	0.729	0.554	5.69973e-16
8	Pla2g162	0.323131	0.715	0.53	2.06656e-15
8	Cdh11	0.25208	0.823	0.68	9.12407e-15
8	Gch12	0.257769	0.954	0.884	1.84011e-14
8	Cacna2d1	0.287766	0.767	0.627	2.36761e-14
8	Hmgn31	0.268214	0.832	0.712	9.8003e-14
8	Atp1a1	0.304156	0.849	0.806	1.21302e-13
8	Cnot6l1	0.256051	0.854	0.721	1.59745e-12
8	Slc2a5	0.254466	0.741	0.598	2.99045e-12
8	Unc80	0.260323	0.724	0.601	4.91216e-12
8	Wnt43	0.39611	0.676	0.559	7.37023e-12
8	Sorbs2	0.276174	0.626	0.478	8.03548e-12
8	Serpina101	0.284017	0.945	0.817	2.48359e-11
8	Mrln	0.289243	0.6	0.459	2.97448e-11
8	Il18bp1	0.269665	0.669	0.534	7.15574e-11
8	Wipi12	0.29128	0.554	0.394	7.68261e-11
8	Hepacam21	0.275084	0.631	0.488	1.70061e-10
8	Gatsl21	0.25009	0.683	0.546	4.15731e-10
8	Scgn1	0.273583	0.664	0.569	6.42969e-09
8	Sowahc3	0.274503	0.7	0.557	2.84793e-07
8	Defb12	0.434584	0.655	0.501	3.19948e-07
8	AW1120101	0.444069	0.427	0.289	1.13107e-05
8	Egr11	0.258571	0.592	0.464	4.69403e-05
9	Ace21	0.862886	0.679	0.068	3.09883e-179
9	Arx1	0.667931	0.585	0.069	5.91165e-121
9	Fgb1	1.34981	0.591	0.078	6.33999e-110
9	Tspan82	1.45604	0.937	0.253	1.03464e-109
9	Ppy1	4.11318	0.994	0.664	1.37444e-96
9	Folr12	0.874584	0.723	0.149	1.43485e-96
9	Pyy2	2.59663	1	0.543	1.89273e-95
9	Spp11	1.13982	0.937	0.294	2.75053e-81
9	Olfm3	0.291442	0.314	0.032	4.8637e-72
9	Gc1	0.718348	0.818	0.219	1.2225e-63
9	Cd91	0.785119	0.711	0.2	9.97205e-57
9	Cst32	0.767804	0.981	0.972	2.07162e-52
9	Rcn31	0.345453	0.365	0.058	5.95286e-50
9	Calb11	0.368254	0.39	0.07	5.69726e-47
9	Scg52	0.627879	0.975	0.933	7.78727e-47
9	Ctxn2	0.256783	0.283	0.038	2.17586e-46
9	Etv12	0.701774	0.723	0.246	2.8189e-43
9	Cfi	0.313833	0.264	0.036	8.72553e-43
9	Rab3c1	0.252008	0.321	0.053	1.30078e-40
9	Rflna	0.383278	0.403	0.093	2.00191e-36
9	Clu1	0.316815	0.855	0.442	5.90088e-34
9	Tm4sf41	0.858119	0.937	0.773	4.43549e-32
9	Cd813	0.532157	0.893	0.431	4.15992e-30
9	Ctsz1	0.45721	0.83	0.442	1.31805e-28
9	Malat12	0.552336	0.987	0.996	2.27148e-27
9	Fgl21	0.703433	0.78	0.43	1.12566e-24
9	Itm2c1	0.536352	0.956	0.851	1.70822e-24
9	Tmem176a2	0.543406	0.95	0.83	2.82919e-24
9	Smarca12	0.401146	0.415	0.124	1.17048e-23
9	Kdelr3	0.27414	0.358	0.098	4.58751e-23
9	Epcam2	0.452867	0.956	0.783	6.84694e-23
9	Gria22	0.372423	0.465	0.151	1.4828e-22
9	Gpx32	0.29109	0.723	0.277	2.80258e-22
9	Itm2b2	0.403438	0.981	0.979	3.64342e-22
9	Bambi2	0.648871	0.56	0.243	3.7561e-22
9	Resp183	0.454679	0.975	0.909	6.07086e-19
9	Gnas2	0.324799	0.994	0.995	3.18547e-17
9	Cpq2	0.514414	0.818	0.629	7.21798e-17
9	4930539E08Rik1	0.593063	0.27	0.074	1.39934e-15
9	Tmem273	0.443176	0.95	0.888	1.49261e-15
9	Nap1l51	0.393493	0.478	0.204	1.61401e-15
9	Ugt2b341	0.390482	0.597	0.303	1.76216e-15
9	Ifitm22	0.530017	0.692	0.387	9.27842e-15
9	Hist3h2ba2	0.332321	0.365	0.131	3.30714e-14
9	Selenop2	0.475593	0.925	0.839	5.81629e-14
9	5330417C22Rik2	0.429724	0.774	0.561	1.55863e-13
9	Rhou1	0.456233	0.591	0.313	1.87734e-13
9	Gata62	0.319496	0.421	0.165	2.18493e-13
9	Basp12	0.440125	0.522	0.227	3.2167e-13
9	Slc35g21	0.353307	0.635	0.347	3.52494e-13
9	Plin3	0.262951	0.289	0.092	1.02792e-12
9	Muc11	0.350319	0.296	0.097	1.04772e-12
9	Bsg2	0.390488	0.987	0.974	3.54714e-12
9	Ocrl2	0.289907	0.56	0.279	1.45828e-11
9	Tmem59l2	0.280523	0.491	0.223	2.03461e-11
9	Tmbim41	0.398292	0.893	0.808	5.21119e-11
9	Socs31	0.508554	0.566	0.324	1.9737e-10
9	Sdc42	0.434539	0.824	0.625	2.26059e-10
9	Spint22	0.332034	0.95	0.881	1.39165e-09
9	Gm451592	0.340895	0.572	0.294	2.57864e-09
9	Ikbip1	0.292188	0.516	0.287	4.33824e-09
9	Stmn31	0.265155	0.396	0.181	6.03934e-09
9	Zfp608	0.290311	0.453	0.227	7.25112e-09
9	Tesc	0.257786	0.283	0.108	8.39847e-09
9	Adk	0.284542	0.591	0.379	9.75062e-09
9	Alcam2	0.326769	0.83	0.635	1.07483e-08
9	Aplp12	0.348531	0.899	0.811	1.26496e-08
9	Prdx42	0.298173	0.579	0.339	2.42967e-08
9	Pgrmc12	0.268078	0.799	0.622	1.03585e-07
9	Hs6st12	0.329635	0.66	0.437	2.62e-07
9	Gm12216	0.282541	0.591	0.344	2.71923e-07
9	Ctsl2	0.31774	0.975	0.946	3.7911e-07
9	Scn3a1	0.314791	0.365	0.168	8.41422e-07
9	Cpne8	0.313714	0.34	0.159	2.5145e-06
9	Tle12	0.264925	0.516	0.301	3.91957e-06
9	Ssbp22	0.303773	0.522	0.324	8.06888e-06
9	Gbp32	0.618534	0.623	0.463	3.02544e-05
9	Dnm3	0.37151	0.447	0.268	3.05228e-05
9	Nav21	0.335817	0.736	0.611	9.17388e-05
9	Sec621	0.283663	0.887	0.803	0.000281505
9	Myl12b1	0.257116	0.818	0.734	0.000334952
9	H2afv1	0.267375	0.616	0.448	0.000662031
9	8430408G22Rik2	0.539987	0.371	0.201	0.000810044
9	Dbpht22	0.357652	0.403	0.239	0.00462448
9	Iigp1	0.630803	0.572	0.418	0.00537542
9	Celf42	0.250445	0.616	0.486	0.0198613
9	Uqcrfs11	0.251247	0.818	0.729	0.0290807
9	Plcb41	0.264497	0.447	0.3	0.0369711
9	Slc16a101	0.259979	0.553	0.439	0.0493643
9	Cplx21	0.273411	0.604	0.483	0.125864
9	Junb2	0.388307	0.736	0.649	0.248394
9	Egr12	0.289694	0.597	0.468	0.462523
9	AW1120102	0.457067	0.434	0.293	0.714389
9	Kcnq1ot12	0.25519	0.874	0.824	0.958987
9	Irf12	0.269403	0.667	0.554	1
9	Xbp1	0.341538	0.887	0.883	1
9	Neurl33	0.533465	0.27	0.173	1
9	Rgs22	0.346012	0.333	0.228	1
10	Fabp4	3.52419	0.884	0.007	0
10	Timp3	3.37339	0.935	0.03	0
10	Flt1	3.2884	0.971	0.004	0
10	Ctla2a	3.23849	0.957	0.009	0
10	Ly6a	3.15865	0.746	0.029	0
10	Esm1	3.12138	0.862	0.002	0
10	Igfbp3	3.0433	0.768	0.003	0
10	Egfl7	2.84377	0.993	0.025	0
10	Ednrb	2.79703	0.964	0.013	0
10	Plvap	2.71848	0.971	0.002	0
10	Sparc	2.70664	0.986	0.024	0
10	Emcn	2.63832	0.971	0.002	0
10	Sparcl1	2.51625	0.92	0.009	0
10	Col4a1	2.50108	0.964	0.078	0
10	Ecscr	2.49287	0.949	0.008	0
10	Gpihbp1	2.46964	0.841	0.001	0
10	Gng11	2.44605	0.891	0.02	0
10	Msn	2.43658	0.986	0.044	0
10	Eng	2.43329	0.935	0.01	0
10	Cyp1a1	2.38358	0.457	0.002	0
10	Tm4sf1	2.37283	0.935	0.03	0
10	Col4a2	2.2759	0.957	0.015	0
10	Gimap6	2.26341	0.957	0.01	0
10	Esam	2.20419	0.964	0.048	0
10	Cd34	2.19847	0.942	0.001	0
10	Ly6c1	2.19677	0.652	0.002	0
10	Kdr	2.18936	0.87	0.002	0
10	Pecam1	2.14893	0.906	0.014	0
10	Srgn	2.10546	0.957	0.021	0
10	Cdh5	2.09356	0.935	0.001	0
10	Plpp3	2.06477	0.891	0.032	0
10	Adgrf51	1.95304	0.949	0.054	0
10	Inhbb	1.95036	0.848	0.011	0
10	Vim	1.93661	0.855	0.046	0
10	Fam167b	1.9085	0.833	0.001	0
10	Myct1	1.86564	0.891	0.001	0
10	Angpt2	1.86361	0.739	0.008	0
10	Ptprb	1.81221	0.819	0.002	0
10	S1pr1	1.77528	0.906	0.008	0
10	Sh3bp5	1.76681	0.833	0.035	0
10	Fxyd5	1.72051	0.87	0.046	0
10	Cd93	1.7109	0.812	0.005	0
10	Ets1	1.66477	0.862	0.014	0
10	Gja1	1.66087	0.87	0.004	0
10	Plpp1	1.64225	0.775	0.011	0
10	Rgcc	1.62938	0.703	0.01	0
10	Slfn5	1.62175	0.746	0.013	0
10	Nrp1	1.60542	0.804	0.029	0
10	Adgrl4	1.57706	0.855	0	0
10	Mmrn2	1.5559	0.826	0.008	0
10	Thbs1	1.541	0.58	0.012	0
10	Cavin3	1.53567	0.761	0.021	0
10	Lamb1	1.52759	0.819	0.014	0
10	Dusp6	1.50752	0.746	0.027	0
10	Wwtr1	1.48433	0.775	0.013	0
10	Stc1	1.4666	0.609	0.021	0
10	Mgll	1.46621	0.703	0.004	0
10	Sox18	1.46006	0.681	0.001	0
10	Anxa3	1.45215	0.848	0.034	0
10	Cyyr1	1.43648	0.739	0.001	0
10	Adgrl2	1.43111	0.739	0.016	0
10	Robo4	1.4185	0.797	0.001	0
10	Mcam	1.40909	0.754	0.004	0
10	Ramp3	1.39587	0.717	0.015	0
10	Rasip1	1.36634	0.739	0.014	0
10	Nid1	1.36347	0.768	0.017	0
10	Col13a1	1.35862	0.587	0.001	0
10	Nfib	1.35769	0.797	0.024	0
10	Slc9a3r2	1.34644	0.717	0.034	0
10	Zfp36l1	1.34114	0.739	0.034	0
10	Hk1	1.30528	0.775	0.044	0
10	Gimap4	1.29317	0.587	0.001	0
10	Sema7a	1.28863	0.681	0.004	0
10	Itga1	1.28694	0.703	0.01	0
10	Arhgap31	1.2827	0.783	0.016	0
10	Smad6	1.27723	0.565	0.012	0
10	Cxcr4	1.21458	0.478	0.008	0
10	Adamts9	1.20598	0.696	0.016	0
10	Dlc1	1.20548	0.739	0.023	0
10	Icam2	1.20441	0.674	0.001	0
10	Dll4	1.19863	0.63	0.018	0
10	Tcim	1.19369	0.681	0.022	0
10	Gimap5	1.16684	0.63	0.002	0
10	Plscr2	1.16579	0.652	0.007	0
10	Tmem204	1.15045	0.717	0.001	0
10	Podxl	1.14598	0.674	0.003	0
10	Pdlim1	1.12661	0.674	0.02	0
10	Gja4	1.11751	0.507	0.008	0
10	Epas1	1.11451	0.594	0.012	0
10	Fstl1	1.11382	0.594	0.015	0
10	Acvrl1	1.10963	0.681	0.012	0
10	Hspg2	1.10183	0.674	0.006	0
10	Lrrc8c	1.09441	0.703	0.021	0
10	Ddah2	1.06404	0.652	0.022	0
10	Prkch	1.06144	0.638	0.009	0
10	Rasgrp3	1.05165	0.659	0.001	0
10	Emp1	1.04773	0.609	0.013	0
10	Ggta1	1.02951	0.58	0.012	0
10	Wwc2	1.02759	0.688	0.031	0
10	Rai14	1.02121	0.659	0.014	0
10	Cmtm3	1.0164	0.645	0.023	0
10	Nid2	1.00511	0.594	0.001	0
10	Clec14a	1.00358	0.543	0	0
10	Vamp5	0.993096	0.659	0.025	0
10	Plxnd1	0.977794	0.587	0.011	0
10	Pcdh17	0.97116	0.536	0.002	0
10	N4bp3	0.970084	0.594	0.014	0
10	Lrrc32	0.969788	0.587	0.006	0
10	Nes	0.964459	0.486	0.011	0
10	Flt4	0.961378	0.623	0.001	0
10	Tie1	0.954469	0.616	0	0
10	Sema3f	0.943379	0.565	0.004	0
10	Emp2	0.935556	0.63	0.023	0
10	Slc43a3	0.930455	0.565	0.003	0
10	Fscn1	0.915485	0.514	0.008	0
10	Ebf1	0.898131	0.551	0.013	0
10	Gngt2	0.896866	0.601	0.018	0
10	Fgd5	0.883598	0.551	0	0
10	Hey1	0.883063	0.384	0.003	0
10	Crim1	0.882285	0.587	0.02	0
10	Lama4	0.881047	0.5	0.007	0
10	Tns1	0.872946	0.58	0.015	0
10	BC028528	0.84638	0.522	0.013	0
10	Smagp	0.845926	0.536	0.013	0
10	Kcne3	0.812675	0.355	0.002	0
10	Adcy4	0.811843	0.522	0.001	0
10	Chst1	0.810751	0.457	0.001	0
10	Chst2	0.804592	0.486	0.01	0
10	Mfng	0.800126	0.457	0.007	0
10	Kitl	0.789697	0.493	0.007	0
10	Afap1l1	0.781247	0.507	0.002	0
10	Notch4	0.780221	0.507	0.011	0
10	Parvb	0.772061	0.551	0.011	0
10	Calcrl	0.76872	0.5	0.005	0
10	Sox7	0.767023	0.442	0.001	0
10	Sox17	0.749584	0.348	0	0
10	Timeless	0.74863	0.442	0.008	0
10	Bvht	0.744575	0.413	0.004	0
10	Gimap9	0.734623	0.464	0.012	0
10	Kit	0.733474	0.478	0.01	0
10	Tmem252	0.730984	0.42	0.002	0
10	Lims2	0.729491	0.413	0.002	0
10	Ppic	0.724641	0.478	0.01	0
10	Mecom	0.724323	0.478	0.004	0
10	Gda	0.720676	0.413	0.004	0
10	Arap3	0.703196	0.464	0.002	0
10	Grrp1	0.702915	0.341	0.002	0
10	St8sia4	0.700033	0.449	0.005	0
10	Inpp5d	0.686358	0.471	0.01	0
10	Gata2	0.685758	0.391	0	0
10	Cracr2b	0.680661	0.457	0.007	0
10	Ppp1r16b	0.657409	0.384	0.002	0
10	Spry1	0.655634	0.449	0.009	0
10	Gimap1	0.61808	0.449	0.009	0
10	Fzd4	0.615846	0.449	0.01	0
10	Piezo2	0.602393	0.406	0.004	0
10	Ehd2	0.601983	0.406	0.008	0
10	Trim47	0.596351	0.457	0.01	0
10	Jcad	0.595394	0.42	0.003	0
10	Mapk12	0.592969	0.377	0.004	0
10	Csgalnact1	0.585331	0.355	0.005	0
10	Nkx2-3	0.576542	0.326	0.003	0
10	She	0.573418	0.399	0.001	0
10	Clec1a	0.563481	0.304	0	0
10	Prex2	0.560561	0.37	0.004	0
10	Cd38	0.542458	0.355	0.002	0
10	Gpx8	0.539476	0.42	0.008	0
10	Fli1	0.536531	0.377	0.006	0
10	Ackr2	0.535058	0.29	0.001	0
10	Klhl6	0.518196	0.348	0.005	0
10	Itgb3	0.517798	0.406	0.005	0
10	Plxna4	0.510318	0.312	0.001	0
10	Ushbp1	0.502714	0.362	0.003	0
10	Eva1a	0.495932	0.355	0.003	0
10	Cdh13	0.481715	0.355	0.003	0
10	Grap	0.470699	0.362	0.001	0
10	Tek	0.452904	0.333	0.001	0
10	Arhgef15	0.440338	0.283	0.001	0
10	Hoxb4	0.439304	0.312	0.004	0
10	Gpr4	0.418833	0.333	0.001	0
10	Dysf	0.418204	0.341	0.002	0
10	Pear1	0.409119	0.319	0.003	0
10	Rnf144a	0.403957	0.275	0.002	0
10	Unc45b	0.392218	0.304	0	0
10	Kcnk5	0.389858	0.254	0.001	0
10	St6galnac3	0.285071	0.254	0.001	0
10	Ptpre	0.827288	0.522	0.017	1.98169e-300
10	Ephb4	0.380612	0.275	0.002	8.28825e-299
10	Rhoj	1.04506	0.667	0.032	2.44061e-295
10	Ptgs1	0.421162	0.297	0.003	3.29606e-294
10	Vwa1	1.35641	0.681	0.035	7.41141e-290
10	Nrp2	1.17707	0.688	0.035	3.12292e-289
10	Crip2	1.42701	0.732	0.042	4.59933e-286
10	Itga5	0.488938	0.406	0.009	2.64124e-285
10	Kcnj8	0.827739	0.326	0.005	2.66838e-285
10	Unc5b	0.864722	0.572	0.023	1.30639e-284
10	Chst15	0.618251	0.406	0.01	5.6568e-283
10	Gjc1	0.570994	0.341	0.006	5.05234e-282
10	Ppp1r18	0.682823	0.536	0.019	1.82299e-280
10	Klf2	1.07426	0.471	0.015	1.18457e-278
10	Il15	0.68237	0.348	0.006	7.01255e-278
10	Mef2c1	1.23494	0.783	0.052	1.78864e-273
10	Smtn	0.478291	0.326	0.006	1.15544e-270
10	Tmem47	0.384294	0.312	0.005	9.21778e-270
10	Pdzd2	0.343902	0.275	0.003	4.788e-268
10	Abcc9	0.444119	0.268	0.003	2.91109e-267
10	Scarf1	0.340963	0.254	0.002	6.74337e-267
10	Edn1	0.97	0.312	0.005	1.68836e-266
10	Cdc42ep3	1.48775	0.812	0.061	7.08413e-266
10	Tgfbr2	0.662931	0.449	0.014	2.25623e-265
10	Msrb3	0.384489	0.29	0.004	3.38273e-263
10	Cavin1	0.689452	0.449	0.014	4.3009e-263
10	Swap70	0.800408	0.529	0.021	1.71758e-261
10	Cdc42ep2	0.987607	0.63	0.033	1.37388e-260
10	Slc16a3	1.19183	0.609	0.03	1.5279e-260
10	Ifitm3	3.1928	0.993	0.104	1.77551e-259
10	Col18a1	0.971218	0.449	0.014	3.14853e-258
10	Hlx	0.404526	0.254	0.003	8.1242e-257
10	Adamts1	1.24173	0.616	0.031	3.226e-256
10	Ier5l	0.899633	0.558	0.025	1.0168e-252
10	S100a161	1.26783	0.739	0.05	1.65754e-250
10	Plekho1	1.06042	0.688	0.042	3.30367e-249
10	Zfp503	0.799676	0.435	0.014	4.786e-248
10	Efnb2	0.852585	0.457	0.016	1.01308e-244
10	Sipa1	0.794056	0.529	0.024	7.87804e-239
10	Fmnl3	0.613484	0.464	0.018	1.46776e-237
10	Rftn1	0.669353	0.428	0.014	1.26113e-235
10	Mfge8	0.987775	0.652	0.04	3.55908e-235
10	Plaur	1.31	0.703	0.048	2.11128e-234
10	Gas7	0.432935	0.261	0.004	2.92218e-232
10	Phf11d	0.978292	0.507	0.023	7.28452e-232
10	Kcnj2	0.601813	0.312	0.007	2.78061e-230
10	Plat	1.5541	0.739	0.058	1.04626e-224
10	Anxa2	1.47935	0.783	0.064	7.32168e-224
10	Sgk1	2.18831	0.819	0.077	7.44716e-224
10	Mndal	1.65816	0.543	0.029	1.53043e-220
10	Rnf125	0.531392	0.355	0.01	7.26479e-219
10	Trim30a	0.913243	0.486	0.022	1.0487e-215
10	Cfap43	0.492074	0.348	0.01	4.87521e-215
10	Serpinh1	1.3771	0.775	0.067	6.04247e-215
10	Tspan12	1.26343	0.703	0.055	7.87175e-212
10	Stard9	0.426416	0.283	0.006	2.68966e-209
10	Tspan4	1.08552	0.667	0.049	1.364e-208
10	Rgs5	1.2155	0.384	0.013	3.25705e-208
10	Tgfb1i1	0.457022	0.37	0.012	2.58186e-201
10	Fgfr1	1.04514	0.645	0.048	9.09597e-201
10	Abi3	0.504775	0.362	0.012	2.24337e-196
10	Tmem2	1.26871	0.79	0.082	6.73984e-196
10	Adgre5	0.447879	0.341	0.011	3.04131e-195
10	Capg	0.82546	0.623	0.042	4.59772e-195
10	Plk2	1.5163	0.754	0.074	7.13246e-193
10	Pmaip1	0.461245	0.268	0.006	2.24466e-191
10	Snai1	0.350716	0.268	0.006	3.33061e-191
10	Fbxl7	0.572833	0.377	0.014	5.09104e-191
10	Nedd9	1.5087	0.79	0.085	1.12397e-190
10	Tgfb1	1.01674	0.58	0.039	1.17561e-190
10	Prdm1	0.915355	0.565	0.038	1.1339e-189
10	Efna1	1.428	0.703	0.064	1.56029e-189
10	Apold1	0.96933	0.565	0.039	7.36339e-187
10	Palmd	0.526495	0.348	0.012	3.21995e-186
10	Ldha	1.94016	0.942	0.134	5.1096e-179
10	Lats2	0.849089	0.565	0.04	3.41646e-178
10	Pmepa1	2.02669	0.971	0.163	3.12377e-177
10	Pdgfrb	0.838962	0.319	0.011	2.43059e-172
10	Serpine1	1.10633	0.522	0.035	1.47931e-169
10	Ifi203	1.65729	0.551	0.04	2.50918e-169
10	Rapgef5	1.13264	0.638	0.058	2.87803e-169
10	Arrb1	0.41638	0.326	0.012	4.20994e-169
10	Tbx3	0.481185	0.297	0.009	6.35192e-167
10	Mcm3	0.409312	0.312	0.011	1.5368e-164
10	Peak1	0.620234	0.464	0.028	1.50851e-163
10	Cttnbp2nl	0.836761	0.623	0.056	4.38451e-162
10	Rest	0.737147	0.435	0.024	4.65083e-162
10	Filip1l	0.795583	0.457	0.027	5.00092e-161
10	Lpar6	1.31378	0.768	0.095	3.31284e-160
10	Eml1	1.3113	0.732	0.087	4.35773e-160
10	Cav1	0.397712	0.275	0.008	1.61133e-159
10	Gnb4	0.998618	0.616	0.056	1.75499e-158
10	Notch1	1.36936	0.819	0.117	3.60209e-157
10	Cnn2	0.595333	0.355	0.016	6.64632e-156
10	Gimap8	0.51395	0.355	0.016	2.15337e-155
10	Procr	0.67705	0.362	0.017	2.08062e-154
10	Tspan9	0.699808	0.507	0.038	1.44501e-153
10	Ramp2	1.22367	0.717	0.086	2.29745e-152
10	Plekhg2	0.349388	0.304	0.012	3.50693e-152
10	Sash1	0.994021	0.587	0.053	4.22528e-152
10	Prrx1	0.658895	0.29	0.01	9.58789e-151
10	Ecm1	0.715125	0.406	0.023	1.27746e-150
10	Arhgap29	1.08206	0.696	0.08	1.53811e-149
10	Id31	2.4683	0.957	0.191	9.57338e-148
10	Myo1e	0.787245	0.529	0.043	1.49638e-147
10	Lhfp	0.517874	0.312	0.013	2.82049e-146
10	Lmo2	0.932451	0.587	0.055	3.675e-146
10	Sept4	0.418094	0.304	0.012	4.47667e-144
10	Rhoc1	2.13936	0.986	0.228	5.77451e-144
10	Ehd4	1.64829	0.87	0.155	6.05042e-144
10	Scn1b	0.841606	0.536	0.047	7.00524e-144
10	Bnip2	1.38713	0.841	0.14	6.77661e-143
10	Sema6d	1.32868	0.768	0.112	2.24997e-141
10	Ndufa4l2	0.769128	0.312	0.013	7.87543e-141
10	Id11	1.94163	0.783	0.107	1.02432e-140
10	Pmp22	0.584162	0.399	0.024	1.11362e-140
10	Adamts4	0.66909	0.384	0.022	6.79852e-139
10	Hoxb2	0.373152	0.261	0.009	9.26765e-135
10	Pde1a	0.415028	0.261	0.009	1.03927e-134
10	Rapgef3	0.403587	0.254	0.009	2.78746e-133
10	Hcls1	0.43738	0.348	0.018	3.6687e-133
10	Homer3	0.428186	0.254	0.009	9.00579e-131
10	Sp100	0.72004	0.399	0.026	2.74201e-130
10	Mospd1	0.368405	0.283	0.012	4.49722e-129
10	Spred1	0.873659	0.601	0.065	1.22591e-128
10	Cyba	0.809585	0.601	0.061	2.61459e-128
10	Csrp2	1.20683	0.725	0.104	8.64813e-128
10	Exoc3l4	0.769991	0.601	0.065	1.18536e-127
10	Fcgrt	0.353739	0.297	0.014	7.79665e-127
10	Tpm2	0.89607	0.304	0.015	3.34134e-125
10	Fyn	0.939703	0.659	0.086	1.35908e-124
10	Plekho2	0.454387	0.319	0.017	5.40005e-124
10	Hes1	1.37132	0.717	0.109	3.13162e-123
10	Itpripl2	0.469373	0.377	0.024	6.48247e-123
10	Serpine2	0.925307	0.493	0.044	6.91355e-123
10	Ptpn14	0.341259	0.261	0.011	2.44454e-121
10	Endod1	1.26205	0.775	0.138	1.43651e-119
10	Mdfic	0.394337	0.304	0.016	5.58484e-119
10	Pros1	0.742963	0.514	0.051	5.04244e-117
10	Jam2	1.13282	0.688	0.104	2.34172e-116
10	Rhob	1.44036	0.812	0.157	7.31695e-114
10	Entpd1	0.390754	0.283	0.014	9.71498e-113
10	Asap2	0.77843	0.464	0.043	4.98459e-112
10	Cdkn1a	1.70778	0.986	0.284	7.54137e-112
10	4931406P16Rik	1.12277	0.783	0.15	9.40718e-112
10	Ehbp1l1	0.420652	0.333	0.021	3.57118e-111
10	Nos3	0.368023	0.268	0.013	4.39892e-111
10	Rnd1	0.686599	0.29	0.016	2.70888e-108
10	Vgll4	1.05768	0.681	0.108	6.95308e-108
10	Cx3cl1	1.02667	0.471	0.048	5.89753e-106
10	Arrdc3	1.3907	0.797	0.173	3.54084e-105
10	Pdgfb	0.930682	0.514	0.058	1.21099e-104
10	Tspan18	0.430411	0.254	0.012	1.60256e-103
10	Alox12	0.550946	0.312	0.02	1.7001e-102
10	Prss23	0.965121	0.384	0.032	1.177e-101
10	Stab1	0.370992	0.275	0.015	6.34715e-101
10	Tmem173	0.441012	0.304	0.019	1.61361e-100
10	Marcksl1	0.845208	0.522	0.061	1.67456e-100
10	Smpdl3a	1.68294	0.797	0.181	2.36087e-100
10	Apbb2	1.52082	0.87	0.242	2.44978e-100
10	Ednra	0.45714	0.261	0.014	4.79619e-100
10	Orai1	0.875719	0.594	0.086	1.49185e-99
10	Acot9	0.79236	0.623	0.093	1.55982e-99
10	Bgn	0.923788	0.268	0.015	4.78371e-99
10	Ahr	0.503212	0.391	0.034	6.354e-99
10	Phactr2	0.811864	0.435	0.043	1.76422e-98
10	Slc15a3	0.416968	0.319	0.021	9.56927e-98
10	Flna	0.693039	0.5	0.057	1.67491e-97
10	Kctd12b	1.16529	0.623	0.099	2.17826e-97
10	Dock1	0.581815	0.457	0.047	3.76767e-97
10	Csrp1	1.12179	0.71	0.133	5.90622e-97
10	1700025G04Rik	0.739522	0.478	0.054	2.98522e-96
10	Tcf4	2.43564	1	0.51	3.52538e-96
10	Pgm2l1	0.579215	0.406	0.038	2.80638e-95
10	Cd151	1.27537	0.826	0.212	3.66589e-95
10	Ier3	1.97669	0.899	0.248	4.73808e-95
10	Col5a2	0.767417	0.254	0.013	5.59176e-95
10	Ifi204	0.771706	0.362	0.03	1.04657e-94
10	Qk	1.30569	0.826	0.208	3.54173e-94
10	Sema6a	0.550709	0.333	0.025	4.08822e-94
10	Zeb2	0.574466	0.362	0.029	5.85594e-94
10	Irf8	1.12453	0.623	0.095	6.0148e-94
10	Olfml2b	0.330495	0.254	0.014	1.45941e-93
10	Dab2	0.360425	0.268	0.016	2.2295e-92
10	Gm26532	0.466612	0.377	0.033	3.18017e-92
10	Bmpr2	1.35795	0.826	0.222	4.45387e-91
10	Lgals9	1.05423	0.543	0.076	8.63999e-91
10	Hspb12	0.674132	0.638	0.094	1.33124e-90
10	Serinc3	1.99197	0.978	0.487	1.63469e-90
10	Pim3	1.23099	0.775	0.184	5.18208e-89
10	Aplp21	1.44988	0.928	0.347	2.9921e-88
10	Fez2	0.75493	0.601	0.098	5.60905e-88
10	Ptprg	0.64035	0.413	0.043	7.63838e-87
10	Lamc1	0.862037	0.58	0.093	9.70528e-87
10	Ptprk	0.76885	0.58	0.089	2.65748e-86
10	Hip1	0.803823	0.58	0.094	4.48729e-86
10	Spry4	0.386064	0.268	0.017	1.28904e-85
10	Synpo	0.80164	0.507	0.071	7.1868e-85
10	Mgp	2.81524	0.333	0.029	1.82038e-84
10	Fhod1	0.291201	0.261	0.017	2.61254e-84
10	Dock4	0.750045	0.514	0.072	2.10365e-83
10	Fosl2	1.03448	0.746	0.169	7.38246e-83
10	Nqo1	0.681767	0.283	0.021	4.77763e-82
10	Cald1	1.641	0.754	0.18	1.78393e-81
10	Arap2	0.297993	0.275	0.019	3.0826e-81
10	Cd92	1.32683	0.797	0.2	3.95665e-81
10	Sox4	1.62827	0.891	0.322	5.89825e-81
10	Ifi211	0.410399	0.268	0.019	2.71489e-80
10	Sptbn1	1.6993	0.978	0.63	4.24465e-80
10	Plod1	0.72819	0.507	0.075	5.42721e-80
10	Ostf1	1.41822	0.855	0.291	5.72212e-79
10	Bok	0.468703	0.29	0.023	1.17844e-78
10	Sh2b3	0.608651	0.507	0.075	6.5141e-78
10	Fam43a1	0.996076	0.601	0.108	6.8273e-78
10	Igfbp71	2.56285	0.978	0.713	1.15269e-77
10	Batf2	0.763591	0.341	0.033	3.06667e-77
10	Cyr61	0.949398	0.275	0.021	5.43889e-77
10	Sh2d3c	0.606909	0.464	0.063	1.00869e-76
10	Osmr	0.58719	0.348	0.034	1.15585e-76
10	Lrrk2	0.400052	0.283	0.022	5.56665e-76
10	Clec2d1	0.849819	0.594	0.104	1.85599e-75
10	Afap1	0.4324	0.275	0.021	6.14735e-75
10	Galk1	0.325549	0.254	0.018	6.71101e-75
10	Tpm3	1.55997	0.964	0.592	1.34363e-74
10	Tpm4	1.6039	0.928	0.445	1.91326e-74
[truncated: 6,215 more rows]
