# Supplementary material for: Single-cell RNA sequencing of mouse islets exposed to proinflammatory cytokines
Source: Life Sci Alliance. 2021 Apr 21;4(6):e202000949. doi: 10.26508/lsa.202000949 (PMC8091599; doi:10.26508/lsa.202000949)
Supplement: Supplementary file 7 [file LSA-2020-00949_TableS7.xlsx]

## Sheet: PP_markers_S2_vs_Control
Gene	Avg ln(Fold change)	Fraction cells in sample expressing gene	Fraction cells in control expressing gene	Adjusted p-value
Ins2	-1.51675	1	1	1.29064e-08
Rpl39	0.985506	0.967	1	2.62718e-06
Wnt4	-1.46214	0.067	0.931	4.8117e-06
Rps21	0.748879	0.967	1	5.64914e-06
Pnrc1	1.56758	1	0.793	9.54793e-06
Ins1	-1.73561	0.733	1	1.12523e-05
Sec61g	0.816461	0.967	1	2.731e-05
Cebpd	2.22943	0.933	0.414	3.14213e-05
Nfkbia	1.59918	0.933	0.345	0.000103288
Ddx5	0.649519	1	1	0.000149416
Eef1a1	0.593348	1	1	0.000169197
Pyy	-0.940229	1	1	0.000560768
Cplx2	-0.77214	0.167	0.897	0.000679122
Isg20	0.994586	0.933	0.724	0.0010854
Sod2	1.65954	0.9	0.69	0.00150488
mt-Nd3	0.986469	0.967	1	0.00172401
Steap4	1.96544	0.667	0	0.00322281
Cpe	0.494857	1	1	0.0044722
P3h4	-0.417371	0.067	0.793	0.00514648
Rps29	0.598425	1	1	0.00672191
Lamtor4	-0.387907	0.067	0.793	0.0073413
Tm4sf4	1.11024	0.967	1	0.00821175
Tpt1	0.461097	1	1	0.00906838
Ucp2	-0.802923	0.3	0.966	0.0155138
Ptov1	-0.654122	0.167	0.862	0.0157537
Pgls	-0.698342	0.333	0.966	0.0190669
Rflna	-0.504265	0.1	0.828	0.0192554
Fam183b	-0.595412	0.3	0.966	0.0313785
Rps28	0.9385	0.967	1	0.0343322
Birc3	1.09361	0.667	0.103	0.03649
Sorbs2	-0.443857	0	0.552	0.0582768
Rps27	0.564592	1	1	0.0588762
C1qtnf4	-0.542972	0.233	0.931	0.065587
Hif1a	1.3633	0.833	0.586	0.0662599
Rab25	-0.430398	0.1	0.724	0.078432
Pnmal1	-0.45836	0.033	0.621	0.0815169
Ctxn2	-0.482208	0.1	0.724	0.092253
Gnai1	-0.420742	0.033	0.621	0.0969785
Basp1	1.61	0.733	0.276	0.0976843
Gria2	-0.470388	0.167	0.862	0.0976843
H2-K1	0.88918	0.967	1	0.0992173
Aplp2	-0.397826	0.1	0.724	0.108388
Gm45159	1.12074	0.833	0.552	0.117298
Cox7c	0.621347	0.967	1	0.12346
Cyb5r3	-0.461391	0.333	0.931	0.135283
Pappa2	-0.68269	0.2	0.828	0.142712
Cyb561d2	-0.307605	0	0.517	0.142917
Sec23a	-0.330777	0	0.517	0.142917
Pcsk1n	-0.522166	1	1	0.151321
Cd9	1.00561	0.867	0.586	0.164834
Hgfac	-0.471209	0.1	0.69	0.18134
Mcee	-0.378078	0.033	0.586	0.196533
Gm42418	-0.492262	1	1	0.210396
Hist3h2ba	-0.503147	0.167	0.828	0.215723
Dio1	-0.499594	0.133	0.724	0.234648
Chic1	-0.708681	0.267	0.862	0.258114
Gpx1	1.16873	0.8	0.621	0.258695
Ssr4	-0.440814	0.867	1	0.284287
Pabpc1	0.898411	0.933	0.966	0.28469
H2-D1	0.821391	0.967	1	0.340474
Rmi1	-0.289282	0	0.483	0.341238
Trp53i13	-0.38449	0	0.483	0.341238
Kcnmb2	-0.45406	0	0.483	0.341238
Fry	-0.383579	0.033	0.552	0.358315
Nudt4	-0.436602	0.033	0.552	0.389884
Ndufa11	-0.548408	0.367	0.966	0.401169
Gmpr	-0.569425	0.2	0.828	0.428607
Ccdc124	-0.293203	0.1	0.69	0.460843
Hist1h1c	-0.453902	0.133	0.724	0.463021
Ctsl	0.952558	1	1	0.465358
Nfkbiz	0.792411	0.6	0.103	0.465464
M6pr	0.657294	0.8	0.483	0.550321
Mbd2	0.889748	0.767	0.586	0.574238
Rpl37	0.574438	0.967	1	0.585727
Yipf2	-0.299744	0.033	0.552	0.591625
Zfp608	-0.444433	0.2	0.862	0.687985
Qsox1	-0.399966	0.033	0.517	0.757735
Pigp	-0.535832	0.4	0.897	0.77013
Gstt1	-0.34878	0.1	0.655	0.809475
Slc2a5	-0.569393	0.367	0.897	0.855175
Dnajc24	-0.327337	0.067	0.586	0.858128
Eci2	-0.505007	0.2	0.793	0.876076
Emc3	-0.281657	0.067	0.621	0.901068
Rpl3	0.455516	1	1	0.917972
Ier3	1.2979	0.567	0.069	0.964353
Idh3b	-0.47184	0.033	0.517	0.971129
Marcks	1.09103	0.733	0.483	1
Btf3	0.565942	0.933	1	1
Ube2m	-0.290709	0.033	0.517	1
Vdac1	-0.375944	0.2	0.897	1
Mageh1	-0.542502	0.367	0.966	1
Cenpv	-0.524141	0.2	0.793	1
Mrpl28	-0.396642	0.1	0.655	1
Fis1	-0.485205	0.333	0.931	1
Cd302	0.739625	0.433	0	1
Hamp	2.79796	0.433	0	1
Icam1	0.766755	0.433	0	1
S100a11	0.807129	0.9	0.966	1
Thra	-0.284057	0.033	0.517	1
Rab3a	-0.313886	0.067	0.586	1
As3mt	-0.32788	0.067	0.586	1
Ap2s1	-0.394888	0.167	0.759	1
Npm1	0.695728	0.9	1	1
Smim1	-0.264672	0	0.414	1
Zfp395	-0.283764	0	0.414	1
Calb1	-0.515451	0.1	0.586	1
Aurkaip1	-0.370107	0.167	0.759	1
Tspyl4	-0.250304	0.067	0.586	1
Ubc	-0.552003	0.833	1	1
Rps15a	0.476314	0.967	1	1
Ndufb7	-0.412016	0.3	0.931	1
Ldlr	-0.281775	0.1	0.655	1
Rpl32	0.484537	1	1	1
Pebp1	-0.522321	0.7	1	1
Vamp2	-0.400532	0.167	0.759	1
Tnrc6c	-0.344942	0.133	0.69	1
Hspa5	0.670279	0.967	1	1
Syt13	-0.47988	0.4	0.931	1
Spp1	1.34012	1	0.966	1
Foxp1	-0.423867	0.333	0.966	1
Epcam	0.58917	0.967	0.966	1
Rimbp2	-0.425451	0.1	0.621	1
Arhgef17	-0.282169	0.033	0.448	1
Ldb1	-0.275148	0.033	0.483	1
Fas	0.580199	0.4	0	1
Selenom	-0.332082	0.233	0.828	1
Ociad2	-0.301335	0.1	0.621	1
Hnrnpa3	0.69963	0.9	0.897	1
Abhd17a	-0.392419	0.133	0.621	1
Nav1	-0.258659	0.033	0.483	1
Rpl34	0.475673	1	1	1
Rps10	-0.34936	0.967	1	1
Cst3	-0.350492	0.933	1	1
Ndrg3	-0.335908	0.1	0.621	1
Rpl36a	0.58195	0.967	0.966	1
Dctn1	-0.317554	0.067	0.552	1
Elof1	-0.326421	0.167	0.759	1
Eif3e	0.836347	0.767	0.586	1
Stard10	-0.45521	0.167	0.69	1
Dbp	-0.336063	0.067	0.552	1
Gatsl2	-0.439437	0.233	0.828	1
Fam117a	-0.310529	0.033	0.448	1
Nrtn	-0.327574	0.067	0.517	1
Crip1	-0.280284	0.1	0.621	1
Cbx6	-0.320704	0.167	0.793	1
Pnmal2	-0.569419	0.3	0.828	1
Lurap1l	-0.251738	0	0.379	1
Thap3	-0.268407	0	0.379	1
Dcaf6	-0.273805	0	0.379	1
Mafa	-0.276351	0	0.379	1
Gstp1	-0.281325	0	0.379	1
Klhdc8b	-0.355733	0	0.379	1
Magi2	-0.297091	0.067	0.517	1
Camk2b	-0.418363	0.233	0.759	1
Ccnd1	-0.411798	0.167	0.69	1
Cxcl2	2.12077	0.433	0.034	1
Cxcl1	2.04132	0.433	0.034	1
Rap1gap	-0.259567	0.1	0.621	1
Mettl26	-0.471575	0.4	0.897	1
Fkbp4	-0.447164	0.467	0.931	1
Clic4	1.20228	0.667	0.414	1
Glul	1.05452	0.667	0.345	1
Vmp1	0.844107	0.767	0.517	1
Ctnnb1	0.633805	0.833	0.862	1
Spcs2	0.464472	0.967	1	1
Mid1ip1	-0.424674	0.167	0.724	1
Gnao1	-0.265961	0.267	0.862	1
Chchd10	-0.37213	0.267	0.828	1
Pfkfb3	0.776543	0.467	0.069	1
Rps23	0.461183	1	1	1
Hmgn3	-0.587732	0.467	0.897	1
Hap1	-0.315893	0.167	0.69	1
Drap1	-0.385971	0.333	0.931	1
Ergic3	-0.4045	0.267	0.828	1
mt-Co1	0.353292	1	1	1
BC029722	-0.257216	0.033	0.448	1
Slain2	-0.263113	0.033	0.448	1
Tspan5	-0.277479	0.033	0.448	1
Mtfp1	-0.315291	0.033	0.448	1
Ddt	-0.357598	0.133	0.621	1
Jun	-0.757519	0.6	0.897	1
Cyhr1	-0.32659	0.167	0.724	1
Tubgcp4	-0.255037	0.033	0.414	1
Pdgfrl	-0.293936	0.033	0.414	1
Zcrb1	-0.504323	0.433	0.966	1
Rpl30	0.387747	1	1	1
Tmem160	-0.333552	0.133	0.621	1
Nbr1	-0.30754	0.2	0.759	1
Xbp1	0.977065	0.867	0.966	1
Vamp8	-0.403595	0.333	0.862	1
Tecr	-0.428513	0.433	0.931	1
Mcf2l	-0.319339	0.133	0.621	1
Nkx2-2	-0.385065	0.133	0.621	1
Mrpl41	-0.273643	0.2	0.759	1
Mast4	0.980108	0.767	0.759	1
Gch1	0.742051	0.833	0.69	1
Ndufb8	-0.415119	0.333	0.862	1
Etv1	-0.49083	0.5	0.966	1
Btg1	0.830805	0.767	0.621	1
Ncl	0.553932	0.9	0.966	1
Mpc2	-0.450213	0.533	1	1
Zfand1	-0.2618	0.067	0.483	1
Numa1	-0.29487	0.167	0.655	1
Chid1	-0.302041	0.033	0.414	1
Fos	-0.464476	0.033	0.414	1
Myo1b	0.623256	0.633	0.345	1
Etfa	-0.257114	0.1	0.586	1
Pja1	-0.36483	0.1	0.552	1
Ddx41	-0.327302	0.2	0.759	1
Pold4	-0.27638	0.033	0.414	1
Ddc	-0.450293	0.033	0.414	1
Rpl41	0.443446	0.967	1	1
Eif3c	0.688731	0.833	0.862	1
Rtn2	-0.269923	0.033	0.414	1
Fam173a	-0.326713	0.167	0.655	1
Fam50a	-0.270458	0.067	0.483	1
Cox6c	0.72517	0.933	0.862	1
mt-Co3	0.389057	1	1	1
Hepacam2	-0.374623	0.167	0.69	1
Snrpf	0.831585	0.867	0.724	1
2510046G10Rik	-0.261908	0.033	0.414	1
Tns3	-0.281562	0.033	0.414	1
Hnrnpu	0.534403	0.867	0.966	1
Rps20	0.388232	0.933	1	1
Rabac1	-0.497797	0.6	1	1
Rpl22l1	0.525305	0.967	1	1
Anxa6	0.726374	0.733	0.517	1
Hnrnpf	0.669378	0.9	0.966	1
Tnip1	0.550751	0.467	0.103	1
C1qa	-0.337258	0.033	0.414	1
Ccl2	1.39712	0.333	0	1
Pxdc1	0.604859	0.433	0.069	1
Ifngr2	0.583255	0.433	0.069	1
Cxxc4	-0.363919	0.2	0.724	1
Defb1	1.70921	0.5	0.138	1
Bphl	-0.261435	0.1	0.552	1
Csnk1g2	-0.337794	0.1	0.552	1
Svip	-0.277229	0.067	0.483	1
Tshz1	-0.280766	0.067	0.483	1
Tmem106c	-0.283336	0.067	0.483	1
Syt7	-0.29118	0.3	0.897	1
Polr2g	-0.332642	0.333	0.931	1
mt-Nd4	0.41924	1	1	1
Cpn1	-0.28651	0.067	0.483	1
Rbm43	-0.300562	0.067	0.448	1
Pfkl	-0.288983	0.2	0.724	1
Sbno2	0.918476	0.567	0.241	1
Rpl35a	0.394771	0.967	1	1
Zbtb20	-0.405141	0.667	1	1
Gstz1	-0.281505	0.133	0.586	1
Kif21a	-0.411319	0.267	0.759	1
Eif6	0.536909	0.767	0.586	1
Rpl6	0.417093	1	1	1
Naca	0.425377	1	1	1
Insm1	-0.269709	0.1	0.552	1
Kif12	-0.256313	0.133	0.586	1
Uri1	-0.264754	0.2	0.69	1
Msrb2	-0.255487	0	0.31	1
Ttc28	-0.256048	0	0.31	1
Banp	-0.288263	0	0.31	1
Eif5b	0.562557	0.833	0.862	1
Hsph1	-0.379197	0.133	0.621	1
Rpl31	0.442559	0.9	0.966	1
Fkbp2	-0.363543	0.7	1	1
2900093K20Rik	-0.342583	0.067	0.448	1
Cebpz	0.604119	0.633	0.379	1
Commd9	-0.292847	0.2	0.69	1
Abcc8	-0.361038	0.633	0.966	1
Abhd8	-0.287357	0.1	0.517	1
Serf2	-0.447141	0.767	1	1
Dusp26	-0.309023	0.033	0.379	1
Folr1	-0.497323	0.433	0.828	1
Sf3b2	-0.260556	0.4	0.966	1
Nkx6-1	-0.475398	0.233	0.69	1
Tspo	-0.297696	0.233	0.724	1
Trim39	-0.270291	0.033	0.379	1
Scand1	-0.358836	0.433	0.897	1
Atraid	-0.380096	0.4	0.862	1
Rpl23	0.353901	0.967	1	1
Tmem176b	0.717985	0.967	0.966	1
Nap1l5	-0.34575	0.3	0.793	1
Aldoc	-0.250839	0.033	0.379	1
Cic	-0.252739	0.033	0.379	1
Cadps	-0.310566	0.2	0.69	1
Rpl7	0.363617	0.967	1	1
Coa3	-0.383498	0.533	0.966	1
Tmem59	-0.317682	0.8	1	1
Vps53	-0.262409	0.067	0.448	1
Arsb	-0.325251	0.167	0.621	1
Neurl3	0.637783	0.3	0	1
Gna11	-0.345277	0.333	0.862	1
Hnrnpa1	0.728691	0.7	0.655	1
Gstm1	-0.343499	0.1	0.517	1
Hsp90aa1	0.576421	0.967	1	1
1500011K16Rik	-0.26066	0.133	0.586	1
Psme2	0.607361	0.867	0.828	1
Egr1	-0.554936	0.333	0.759	1
Rpl38	0.509412	0.933	1	1
Copz2	-0.305406	0.1	0.483	1
Aes	-0.40662	0.767	1	1
Trappc2l	-0.381707	0.433	0.793	1
Gdi2	0.575156	0.8	0.724	1
Sult1d1	-0.262973	0.1	0.517	1
Vps41	-0.29106	0.1	0.517	1
Sfrp5	-0.375532	0.067	0.414	1
Anapc5	-0.348674	0.267	0.724	1
Sncb	-0.312887	0	0.276	1
Edf1	-0.414849	0.433	0.897	1
Fmnl2	0.699582	0.533	0.241	1
Atp6v1g1	0.421398	0.967	1	1
Rab11a	0.637619	0.733	0.724	1
Slc50a1	-0.335356	0.267	0.793	1
Akap8l	-0.32634	0.1	0.483	1
Commd7	-0.301846	0.167	0.586	1
Sorcs2	-0.266419	0.033	0.345	1
S100a10	0.727231	0.633	0.448	1
Rpl24	0.347946	0.967	1	1
Calm2	0.433919	0.933	0.966	1
Sphkap	-0.376724	0.233	0.655	1
Gbp2	0.831026	0.333	0.034	1
Gbp3	0.667934	0.333	0.034	1
Park7	-0.314711	0.433	1	1
Cers2	-0.268488	0.133	0.517	1
Ptms	-0.428453	0.467	0.931	1
Dbpht2	-0.278189	0.2	0.655	1
Adi1	-0.251068	0.067	0.414	1
Sdhaf4	-0.25977	0.133	0.552	1
Ctsb	0.770728	0.8	0.862	1
Cisd1	-0.302772	0.6	0.931	1
Cd47	0.5598	0.867	0.931	1
Pitpnm2	-0.25282	0.033	0.345	1
Nts	1.55437	0.267	0	1
Capn8	0.649345	0.267	0	1
Gbp9	0.584761	0.267	0	1
Baz1a	0.388959	0.267	0	1
Atp5o.1	-0.31217	0.267	0.828	1
Dalrd3	-0.259724	0.1	0.483	1
Eif4a1	0.744475	0.867	1	1
Rplp2	0.33818	0.967	1	1
4930539E08Rik	1.21437	0.367	0.069	1
Pde1c	0.546672	0.367	0.069	1
Ndufa13	-0.279038	0.567	0.966	1
Atp5g1	-0.424508	0.567	0.966	1
Cxxc5	-0.266763	0.267	0.759	1
Ehf	0.711861	0.467	0.172	1
Map2	-0.277429	0.233	0.69	1
Odc1	1.20329	0.633	0.448	1
Snx10	0.67667	0.733	0.621	1
Nop58	0.632012	0.567	0.345	1
Nenf	-0.262571	0.7	1	1
Rgs4	1.15863	0.633	0.483	1
Lrrn1	0.540251	0.4	0.103	1
mt-Co2	0.273396	1	1	1
Trappc6a	-0.258827	0.1	0.483	1
Hadh	-0.295694	0.067	0.414	1
Ran	0.516598	0.767	0.862	1
Ifitm2	0.828362	0.8	0.862	1
Kcnk16	-0.390259	0.267	0.69	1
Sec61b	0.328747	0.933	1	1
Crls1	0.513215	0.5	0.241	1
Socs3	0.93746	0.667	0.517	1
Ncam1	-0.27972	0.233	0.724	1
Pla2g12a	-0.301	0.4	0.862	1
Fgb	1.88807	0.6	0.414	1
mt-Nd2	0.50742	1	1	1
Rps8	0.351427	0.967	1	1
Rps24	0.271373	1	1	1
Scg3	-0.352158	0.733	1	1
Fip1l1	0.48327	0.7	0.655	1
Kif1a	-0.279636	0.267	0.724	1
Rhou	0.696095	0.7	0.586	1
H1f0	-0.326639	0.333	0.793	1
Znrf1	0.456345	0.633	0.448	1
Map2k2	0.468461	0.667	0.552	1
Tlr2	0.377982	0.3	0.034	1
Sez6l	-0.370678	0.033	0.31	1
C8b	-0.251272	0.067	0.379	1
Ehd1	0.963833	0.5	0.241	1
Nop14	0.702826	0.5	0.241	1
Manf	0.483057	0.933	0.966	1
Lsm4	-0.363445	0.333	0.793	1
Eif4ebp1	0.531097	0.4	0.103	1
Pld3	-0.280095	0.233	0.69	1
Selenow	-0.293154	0.233	0.69	1
Csnk1a1	0.332623	0.9	0.966	1
Fau	0.291508	1	1	1
Stub1	-0.303405	0.433	0.931	1
Ddhd2	-0.277937	0.067	0.379	1
Csf1	0.624745	0.233	0	1
Stom	0.446942	0.233	0	1
Ero1lb	-0.323593	0.033	0.31	1
Rps2	0.290959	1	1	1
Rps26	0.425266	0.9	1	1
Prdx1	0.404169	0.9	1	1
Gpx4	-0.457236	0.567	0.966	1
Nfkb1	0.510024	0.5	0.241	1
Slc39a6	0.391121	0.433	0.138	1
Ptp4a2	0.809474	0.667	0.69	1
Lix1l	0.598662	0.467	0.207	1
Cebpb	0.894303	0.6	0.414	1
Pacsin1	-0.255287	0.033	0.31	1
Dcaf17	-0.254428	0.1	0.448	1
Arf1	0.536236	0.8	0.897	1
Spcs1	0.503801	0.867	0.862	1
Tmbim4	0.489674	0.867	0.931	1
Alcam	0.531834	0.8	0.897	1
Arhgdia	-0.261483	0.3	0.828	1
Rpn2	0.431977	0.867	0.897	1
Egln1	0.751047	0.567	0.379	1
H2-T23	-0.286027	0.267	0.69	1
Arrdc4	0.591616	0.4	0.138	1
Relb	0.575541	0.4	0.138	1
Lrrc8d	0.394049	0.4	0.138	1
Atp6v0e	0.496352	0.8	0.966	1
Tmed3	-0.316726	0.8	0.966	1
Nedd8	-0.255776	0.5	0.931	1
Gng5	0.461689	0.867	0.966	1
Spint1	-0.250534	0.233	0.621	1
Wnk1	0.411308	0.833	0.828	1
Ube2q1	-0.315403	0.2	0.552	1
Ywhaz	0.704173	0.6	0.414	1
Anxa5	0.47866	0.833	0.966	1
Slc30a7	0.363495	0.4	0.138	1
Slc39a7	-0.275442	0.4	0.931	1
2300009A05Rik	-0.250548	0.367	0.862	1
Bod1	-0.276095	0.2	0.621	1
Sqstm1	0.558942	0.7	0.655	1
H2afy	-0.28067	0.667	0.966	1
Hnrnpk	0.510488	0.8	0.897	1
Psma5	0.590775	0.7	0.655	1
Abr	-0.282256	0.1	0.414	1
Usmg5	0.561964	0.8	0.828	1
Calr	0.402121	0.933	0.966	1
Zfand5	0.584624	0.667	0.69	1
Tbrg1	0.559813	0.767	0.966	1
Tax1bp1	0.354236	0.8	0.931	1
Abcd3	-0.258477	0.267	0.655	1
Serpinb1a	0.650026	0.367	0.103	1
Cltc	0.576223	0.833	0.897	1
Eif2s2	0.461701	0.8	0.828	1
Eif4a3	-0.262468	0.267	0.724	1
Ndufb3	-0.339826	0.467	0.862	1
Lpl	0.835986	0.733	0.793	1
Ccng1	0.484187	0.4	0.138	1
Denr	0.472664	0.7	0.586	1
Hk1	0.429079	0.267	0.034	1
Noxo1	0.2994	0.267	0.034	1
Ybx1	0.406441	0.967	1	1
Resp18	-0.366607	1	1	1
Slc2a1	0.735047	0.367	0.103	1
Tubb5	0.870921	0.7	0.759	1
Pcbp1	0.475742	0.767	0.897	1
Saraf	0.432429	0.767	0.897	1
Aig1	-0.286051	0.267	0.655	1
Yrdc	0.380124	0.7	0.655	1
Erlec1	-0.310862	0.4	0.897	1
Rps12	0.427951	0.967	1	1
Rpl5	0.325269	1	1	1
Ctsd	-0.324023	0.333	0.759	1
Heg1	0.579414	0.467	0.241	1
Zdbf2	-0.264468	0.3	0.69	1
Rps18	0.293385	1	1	1
Lrg1	1.24028	0.2	0	1
Kalrn	0.386942	0.2	0	1
Gbp4	0.314162	0.2	0	1
Pvr	0.280903	0.2	0	1
Xylt1	0.269553	0.2	0	1
Tnfsf10	0.265514	0.2	0	1
Bcl3	0.417658	0.567	0.345	1
Psma7	0.470547	0.867	0.931	1
App	0.632893	0.733	0.724	1
Gnai2	-0.336407	0.567	0.966	1
Eif1a	0.668662	0.633	0.586	1
Sh3glb1	0.676062	0.767	0.793	1
Igfbp7	-0.392229	0.433	0.828	1
Rps27l	0.43813	0.867	0.931	1
Cpne8	0.636668	0.5	0.276	1
Rgs2	0.567521	0.233	0.655	1
Grb2	0.589161	0.633	0.586	1
Dnajb9	0.539005	0.833	0.897	1
5330417C22Rik	-0.287707	0.567	0.931	1
Ppy	-0.397829	0.967	1	1
Ppp1cb	0.388636	0.767	0.828	1
Arpc1b	0.646914	0.6	0.483	1
Hspa4l	-0.293762	0.233	0.586	1
Rpl22	0.450596	0.9	1	1
Mydgf	-0.257161	0.4	0.897	1
Ace2	-0.29628	0.4	0.897	1
Nucb2	0.472628	0.767	0.759	1
Mapk6	0.4715	0.5	0.31	1
Etv6	0.384036	0.333	0.103	1
Mt1	0.949972	0.867	0.862	1
Rps13	0.343522	1	1	1
Dpm3	-0.324907	0.333	0.793	1
Fyttd1	0.492674	0.5	0.31	1
Parp8	0.395619	0.433	0.207	1
Plscr1	0.440837	0.433	0.207	1
Errfi1	0.44011	0.433	0.207	1
Hsp90b1	0.421268	1	0.966	1
Rplp1	0.263176	1	1	1
Cdcp1	0.641544	0.333	0.103	1
Gpd2	-0.28716	0.133	0.448	1
Dnajb6	0.43642	0.733	0.793	1
Eif3a	0.32831	0.8	0.966	1
Desi2	0.511283	0.533	0.379	1
Sdcbp	0.515878	0.7	0.828	1
Set	0.30364	0.767	0.759	1
Gng2	0.607137	0.333	0.103	1
Son	0.333463	0.867	0.862	1
Btg2	-0.517728	0.533	0.793	1
Ppia	0.278293	0.967	1	1
Rpl10	0.272634	0.967	1	1
Rrbp1	0.255003	0.867	1	1
Vkorc1	-0.267637	0.267	0.621	1
Trip11	0.425901	0.7	0.724	1
Tmed2	0.42993	0.833	0.966	1
Pcmtd1	-0.260998	0.3	0.724	1
Pam	0.624725	0.933	0.966	1
Rhoc	0.424306	0.533	0.345	1
Polr2k	0.427146	0.567	0.483	1
Fxyd3	-0.417768	0.233	0.552	1
Fabp5	1.19941	0.467	0.241	1
Tjp1	0.686517	0.5	0.31	1
Ppp1r10	-0.303692	0.3	0.724	1
Rnd3	0.390383	0.233	0.034	1
Tnfaip8	0.361585	0.233	0.034	1
Orai2	0.307489	0.233	0.034	1
Zfp592	0.298252	0.233	0.034	1
Tnfaip3	0.27488	0.233	0.034	1
Ncam2	0.26197	0.233	0.034	1
Zcchc18	-0.296075	0.3	0.69	1
Rpl23a	0.317433	0.933	1	1
Tmem176a	0.277535	1	1	1
Psme1	0.651444	0.7	0.724	1
Gbp6	0.365394	0.167	0	1
Anxa2	0.359886	0.167	0	1
Fosl2	0.259676	0.167	0	1
Scd2	-0.275558	0.133	0.414	1
Slc30a4	0.285032	0.233	0.034	1
Snhg11	-0.450833	0.033	0.241	1
Pik3c2a	0.361015	0.467	0.276	1
Sdf2l1	-0.265601	0.333	0.724	1
Crybb3	-0.260358	0.033	0.241	1
Id2	-0.443126	0.233	0.552	1
Cmpk1	0.47105	0.7	0.759	1
Cgn	0.523237	0.533	0.448	1
Tmem123	0.337325	0.367	0.138	1
Abi1	0.559802	0.4	0.207	1
Tuba1b	0.583345	0.633	0.655	1
Prkar1a	0.391248	0.867	0.966	1
Ftl1	-0.324822	0.933	1	1
Meis2	0.385661	0.8	0.931	1
Eif4g2	0.37046	0.833	0.931	1
Eef2	-0.291589	0.767	1	1
Cblc	0.292416	0.267	0.069	1
Acsl4	0.50331	0.4	0.207	1
Npc2	-0.256854	0.633	0.966	1
Pnp	0.655662	0.5	0.379	1
Hs6st1	0.418162	0.7	0.724	1
Matr3	0.490206	0.767	0.759	1
Ier3ip1	0.50425	0.6	0.517	1
Dst	0.453165	0.833	0.897	1
Iapp	0.754968	1	1	1
Mtdh	0.309366	0.733	0.793	1
Krt8	0.559999	0.7	0.759	1
Erich3	0.510919	0.333	0.138	1
Lima1	0.35447	0.333	0.138	1
Mbd6	0.342727	0.1	0.379	1
St3gal1	0.504402	0.3	0.103	1
Id3	-0.688073	0.267	0.517	1
Psmb10	-0.27375	0.267	0.621	1
Tuba1a	0.446625	0.8	0.862	1
Atp6ap2	0.366407	0.8	0.862	1
Rbm3	0.411059	0.867	0.966	1
Cry1	0.421577	0.267	0.069	1
Samd9l	0.556191	0.467	0.345	1
Kif1b	-0.269875	0.4	0.828	1
Slc7a1	0.446951	0.333	0.138	1
Muc1	0.676427	0.367	0.172	1
Xpo1	0.275276	0.367	0.172	1
Mrpl33	0.695651	0.633	0.759	1
Txnl1	0.456346	0.733	0.931	1
Esyt2	0.402812	0.433	0.276	1
Hdgf	0.384824	0.833	0.931	1
BC005537	0.496914	0.6	0.517	1
Thoc7	0.495557	0.7	0.724	1
Ssr1	0.366767	0.833	0.862	1
Cwf19l2	0.404558	0.433	0.276	1
Cd2ap	0.497541	0.667	0.759	1
Zfp598	0.371471	0.333	0.138	1
Lamp2	0.333772	0.8	0.966	1
Ranbp2	0.449658	0.6	0.586	1
Rad17	0.449007	0.5	0.379	1
Cox7a2	0.38709	0.867	0.966	1
Fam208b	0.48447	0.333	0.138	1
Bzw2	0.502413	0.433	0.276	1
Metap2	0.614704	0.667	0.793	1
Fndc3a	0.320795	0.8	0.931	1
Plet1	0.989661	0.2	0.034	1
Spata13	0.293244	0.2	0.034	1
Epb41l4b	0.481126	0.533	0.448	1
Slc39a1	0.279119	0.433	0.241	1
Morf4l1	0.27808	0.833	0.966	1
Fgg	1.16123	0.133	0	1
Lcn2	0.500775	0.133	0	1
Pdgfb	0.406116	0.133	0	1
Nxnl2	0.347911	0.133	0	1
Nos2	0.315077	0.133	0	1
Npas2	0.263444	0.133	0	1
Mocs2	0.549215	0.533	0.517	1
Ptp4a1	0.367942	0.567	0.448	1
Rras	0.310177	0.3	0.103	1
Gde1	0.458326	0.767	0.897	1
4933434E20Rik	0.513614	0.6	0.517	1
Chp1	0.351891	0.367	0.172	1
Aldoa	-0.54602	0.8	1	1
Pdia6	0.40028	0.933	1	1
Rpl37a	0.352526	1	1	1
Ptpn1	0.52416	0.633	0.724	1
Fxyd6	-0.29845	0.2	0.448	1
Ywhab	0.318556	0.633	0.552	1
Cycs	0.617559	0.633	0.621	1
U2af1	0.357446	0.633	0.621	1
Ddx21	0.366553	0.467	0.345	1
Mgarp	-0.251553	0.1	0.31	1
Nars	0.530145	0.533	0.517	1
Sh3bgrl	0.26048	0.533	0.414	1
Fgl2	0.808838	0.7	0.724	1
Hadhb	0.420491	0.6	0.586	1
Ap3s1	0.600484	0.5	0.414	1
Sp3	0.413472	0.367	0.207	1
Tmbim6	0.312594	0.867	1	1
Bex3	0.312057	0.9	1	1
Hipk2	-0.267423	0.2	0.448	1
Ubr3	0.379564	0.5	0.345	1
mt-Nd1	0.438135	1	1	1
Sdc4	0.4263	0.833	0.931	1
Mvp	0.537954	0.5	0.414	1
Atat1	0.379953	0.067	0.276	1
Zfp207	0.392079	0.533	0.448	1
Cks1b	0.784446	0.4	0.241	1
Ttr	0.743054	0.633	1	1
Sowahc	0.495992	0.5	0.414	1
Nab1	0.465013	0.467	0.345	1
Il6ra	-0.255277	0.267	0.552	1
Prr13	0.339581	0.567	0.483	1
Ctsz	0.437972	0.733	0.931	1
Litaf	0.358555	0.233	0.069	1
Eif5	0.304204	0.833	0.966	1
Usp9x	0.409393	0.667	0.793	1
Arpc5	0.40093	0.667	0.69	1
Pip5k1b	0.303616	0.233	0.069	1
Irak3	0.373026	0.233	0.069	1
Ptges3	0.585641	0.8	0.897	1
Phip	0.546495	0.7	0.655	1
Rpn1	0.448168	0.7	0.897	1
Irf1	0.312084	0.4	0.241	1
Tmem167	0.306268	0.767	0.793	1
Tomm20	0.337233	0.833	0.966	1
Csde1	0.526196	0.7	0.828	1
Pfdn5	-0.290346	0.8	1	1
Hmox1	0.345474	0.333	0.138	1
Ftsj3	0.362211	0.3	0.138	1
Gpi1	-0.50287	0.5	0.793	1
Sf3b6	0.283942	0.767	0.828	1
Riok1	0.550182	0.433	0.31	1
Ube2d3	0.33011	0.833	0.897	1
Lrch1	0.313801	0.267	0.103	1
Parp9	0.402253	0.3	0.138	1
Txnrd1	0.51196	0.7	0.724	1
Atp8b1	0.362599	0.667	0.69	1
Sppl2a	0.426661	0.5	0.379	1
Cct3	0.500753	0.7	0.724	1
Vgf	0.395016	0.3	0.103	1
Morf4l2	0.385866	0.8	0.966	1
Cd164	0.366176	0.867	1	1
AW112010	0.745147	0.267	0.103	1
Ripk2	0.325562	0.267	0.103	1
Clic1	0.461759	0.667	0.724	1
Mtch2	0.345842	0.6	0.552	1
Rab1a	0.390656	0.667	0.793	1
Rpl4	0.261253	0.967	1	1
Selenot	0.427144	0.7	0.793	1
Alkbh5	0.430247	0.6	0.483	1
Ptprf	0.36914	0.6	0.552	1
Etf1	0.429092	0.533	0.517	1
Tmed7	0.324442	0.667	0.759	1
Skil	0.63439	0.567	0.483	1
Uba5	0.378571	0.567	0.552	1
Cldnd1	0.50764	0.5	0.483	1
Chmp4b	0.56115	0.533	0.517	1
Junb	0.702028	0.7	0.69	1
Slc3a2	0.389124	0.6	0.69	1
Timp1	0.593348	0.167	0.034	1
Dhrs3	0.307575	0.167	0.034	1
Timm8a1	0.285996	0.167	0.034	1
Zcchc7	0.400741	0.533	0.379	1
Cnn3	0.390078	0.467	0.379	1
Smim11	0.347106	0.267	0.621	1
Gnl3	0.334929	0.533	0.517	1
Serbp1	0.274445	0.767	0.828	1
Rala	0.597207	0.6	0.759	1
Trrap	0.32032	0.167	0.448	1
mt-Nd5	0.321221	0.833	0.966	1
Hnrnph1	0.412622	0.7	0.828	1
Kcnq1ot1	0.476721	0.9	1	1
Sept7	0.344469	0.767	0.828	1
Srsf2	0.317684	0.633	0.724	1
G3bp1	0.501234	0.633	0.724	1
Plaa	0.376879	0.367	0.241	1
Pgk1	0.504376	0.733	0.724	1
Lap3	0.581187	0.5	0.483	1
Rtcb	0.440562	0.6	0.586	1
Herc1	0.378122	0.533	0.483	1
Golt1b	0.33467	0.567	0.448	1
Il1r1	0.450512	0.667	0.621	1
Nemf	0.407051	0.567	0.586	1
Ssr3	0.323188	0.7	0.897	1
Tapbp	0.393862	0.7	0.793	1
Cisd2	0.272103	0.6	0.586	1
Gcnt2	0.418747	0.433	0.345	1
Armcx2	0.38551	0.433	0.345	1
Cdk13	0.341265	0.433	0.345	1
Tbca	0.404815	0.733	0.862	1
Atg3	0.499239	0.567	0.586	1
Arx	-0.309138	0.433	0.724	1
Rbm39	0.311995	0.9	1	1
Arl8a	0.316349	0.467	0.379	1
Hnrnpab	0.811348	0.633	0.897	1
mt-Nd4l	0.380483	0.7	0.69	1
Pdia3	0.318227	0.867	1	1
Ptbp3	0.38437	0.633	0.69	1
Nifk	0.32161	0.333	0.207	1
Tmbim1	0.560012	0.433	0.345	1
Gadd45g	0.937384	0.5	0.448	1
Kin	0.3521	0.5	0.448	1
Gfpt1	0.275456	0.767	0.897	1
Picalm	0.483683	0.467	0.379	1
Mgat5	0.331257	0.2	0.069	1
Abhd13	0.286765	0.2	0.069	1
Dap	0.288172	0.9	0.966	1
Usp7	0.298024	0.533	0.483	1
Dnaja2	0.362914	0.567	0.621	1
Susd6	0.470309	0.4	0.31	1
Ddx1	0.364785	0.467	0.448	1
Ankrd17	0.489388	0.6	0.621	1
Gnb1	0.441701	0.733	0.793	1
Psma3	0.351155	0.767	0.966	1
Scfd1	0.357715	0.667	0.897	1
Sat1	0.623945	0.467	0.414	1
Usp36	0.423323	0.333	0.207	1
Gcg	0.87878	0.867	0.966	1
Hp1bp3	0.336878	0.633	0.724	1
Ero1l	0.521347	0.5	0.448	1
Tra2b	0.488102	0.633	0.69	1
Zfp407	0.416471	0.233	0.103	1
Smox	0.276976	0.233	0.103	1
Txn1	0.359445	0.767	0.931	1
Ly96	0.282188	0.267	0.138	1
Gpr19	0.270272	0.2	0.069	1
Igf1r	0.585473	0.333	0.207	1
AW209491	0.404519	0.3	0.172	1
Clint1	0.420472	0.5	0.448	1
Sugt1	0.292716	0.5	0.448	1
Cnot1	0.254483	0.467	0.379	1
Pomp	0.334869	0.833	1	1
Mt2	1.1305	0.567	0.621	1
Mcfd2	0.283425	0.367	0.276	1
Cop1	0.332151	0.467	0.379	1
Bcl7b	0.31959	0.533	0.552	1
Ranbp1	0.549795	0.667	0.862	1
Foxa2	0.523771	0.533	0.517	1
2810474O19Rik	0.412308	0.433	0.31	1
Stx7	0.394514	0.567	0.655	1
Brd4	0.281589	0.433	0.379	1
Rnh1	0.492373	0.667	0.724	1
Arcn1	0.3164	0.733	0.897	1
Clu	1.06719	0.733	0.931	1
Stx3	0.303085	0.467	0.448	1
Tmem263	0.363263	0.367	0.276	1
Tmem251	0.38165	0.367	0.241	1
Plcb4	0.544656	0.467	0.414	1
Scaf11	0.257586	0.7	0.793	1
Itgb1	0.56427	0.667	0.862	1
Kdelr2	0.375133	0.767	0.862	1
Psma2	0.395572	0.767	0.931	1
Dusp16	0.482199	0.367	0.276	1
Papola	0.369548	0.667	0.828	1
Rps25	0.252273	1	1	1
Fndc3b	0.541822	0.533	0.621	1
Uqcrb	0.269272	0.833	0.966	1
Tmem38b	0.302872	0.3	0.172	1
Rnase4	0.590032	0.5	0.517	1
Hivep3	0.624926	0.4	0.345	1
Fam135a	0.523375	0.433	0.379	1
Ninj1	0.28297	0.667	0.724	1
Atp11a	0.30703	0.3	0.172	1
Krt18	0.494778	0.667	0.828	1
Pdcd10	0.542145	0.6	0.69	1
Cox5a	0.468603	0.6	0.69	1
Gsdma	0.340368	0.3	0.172	1
F11r	0.428431	0.333	0.241	1
Ssb	0.437879	0.667	0.862	1
Hspa9	0.343257	0.667	0.69	1
Mrpl24	0.270006	0.267	0.621	1
Cct5	0.547964	0.7	0.862	1
Mat1a	0.523404	0.367	0.276	1
Zfp318	0.267149	0.2	0.414	1
Ldha	0.29416	0.233	0.103	1
Trf	0.529113	0.133	0.034	1
Dyrk3	0.374684	0.133	0.034	1
Ezr	0.348322	0.133	0.034	1
St3gal4	0.273266	0.133	0.034	1
Cyp3a13	0.261905	0.133	0.034	1
Rpl29	0.309066	0.9	0.966	1
Id1	0.817845	0.3	0.172	1
Fnip1	0.32453	0.4	0.345	1
Srp9	0.291126	0.833	1	1
Ddit3	0.279007	0.333	0.207	1
Hook1	0.323296	0.667	0.69	1
Kmt2e	0.367383	0.733	0.862	1
Pak2	0.379524	0.567	0.655	1
Nfe2l1	0.348526	0.5	0.483	1
Rragc	0.27019	0.5	0.517	1
Ubr5	0.309716	0.5	0.552	1
Dnajc8	0.309464	0.533	0.517	1
Upp1	0.434085	0.467	0.379	1
Sf3b1	0.372543	0.767	0.897	1
Sept11	0.401701	0.333	0.241	1
Uqcrfs1	0.475852	0.7	0.862	1
Mettl9	0.348098	0.667	0.897	1
Polr2m	0.251735	0.567	0.552	1
Srsf7	0.666413	0.567	0.724	1
Pbdc1	0.425084	0.433	0.379	1
Appl2	0.551732	0.433	0.379	1
Pid1	0.439986	0.4	0.345	1
Scamp1	0.29773	0.4	0.345	1
Ssh1	0.280909	0.4	0.345	1
2610001J05Rik	0.676981	0.5	0.483	1
Tmf1	0.377685	0.5	0.517	1
Atp5j	0.325729	0.9	1	1
Hint1	0.258727	0.933	1	1
Spop	0.363366	0.633	0.655	1
Chd1	0.343305	0.3	0.207	1
Gnl2	0.269167	0.3	0.207	1
Trpc4ap	0.36796	0.467	0.379	1
Hnrnpll	0.327965	0.367	0.31	1
Rbm5	0.311584	0.533	0.552	1
Smad4	0.273327	0.533	0.552	1
Ndufaf4	0.366852	0.333	0.241	1
Rif1	0.329457	0.433	0.414	1
Sort1	0.295459	0.2	0.448	1
Hypk	0.339507	0.3	0.207	1
Cep126	0.295634	0.3	0.207	1
Sec23b	0.369515	0.5	0.517	1
Aida	0.4628	0.333	0.241	1
Golga5	0.328066	0.367	0.276	1
Twf1	0.380337	0.533	0.517	1
Gcn1l1	0.361039	0.233	0.483	1
Dnajc21	0.427877	0.567	0.621	1
Aatf	0.37696	0.167	0.069	1
Ikbke	0.274078	0.167	0.069	1
Lrrn2	0.257737	0.167	0.069	1
Prom1	0.299911	0.3	0.207	1
Hnrnpa0	0.355057	0.4	0.379	1
Krtcap2	0.301054	0.767	1	1
Pgs1	0.488891	0.267	0.172	1
Tceal8	0.299938	0.6	0.69	1
Arfgef1	0.284041	0.633	0.655	1
Cnot4	0.368738	0.333	0.241	1
Gosr2	0.332742	0.333	0.241	1
Daam1	0.45818	0.533	0.586	1
Erp44	0.394821	0.633	0.655	1
Elf3	0.397425	0.4	0.345	1
Cab39	0.376293	0.433	0.414	1
Frk	0.360431	0.333	0.241	1
Fbxw17	0.274312	0.167	0.069	1
Ak4	0.2616	0.167	0.069	1
Psma6	0.318761	0.633	0.724	1
Surf4	0.307947	0.867	0.862	1
Anp32b	0.425042	0.7	0.828	1
St6gal1	0.479264	0.433	0.379	1
Tnfrsf1a	0.265634	0.467	0.448	1
Vdac3	0.371945	0.667	0.828	1
Gtf2a2	0.360445	0.633	0.759	1
Suco	0.406335	0.567	0.69	1
Slc22a15	0.32462	0.233	0.138	1
Ube4a	0.312293	0.233	0.138	1
Kti12	0.310592	0.233	0.138	1
Rrs1	0.298722	0.233	0.138	1
Plcxd2	0.280681	0.233	0.138	1
Rabggtb	0.436972	0.433	0.448	1
Ube2k	0.336493	0.633	0.724	1
Hectd2	0.421336	0.2	0.103	1
Adam9	0.373309	0.2	0.103	1
Tiparp	0.354967	0.2	0.103	1
Cdkn2b	0.308539	0.2	0.103	1
Clec2d	0.271771	0.333	0.241	1
Cpm	0.43713	0.267	0.172	1
Atad1	0.352778	0.533	0.552	1
1110004F10Rik	0.405513	0.6	0.69	1
Apobec3	0.40434	0.4	0.379	1
Fbxl12	0.333383	0.167	0.069	1
Smim14	0.261311	0.8	0.931	1
Nav2	0.310036	0.633	0.793	1
Klhl24	0.317019	0.333	0.241	1
Tsc22d1	0.622563	0.633	0.759	1
Wtap	0.376759	0.333	0.276	1
Cntrl	0.282876	0.2	0.103	1
Gltp	0.28276	0.2	0.103	1
Nck1	0.32855	0.433	0.414	1
Idh1	0.416953	0.367	0.31	1
Purb	0.342461	0.467	0.414	1
Atp2a2	0.270815	0.633	0.655	1
Tpm1	0.25552	0.6	0.69	1
Sh3bgrl3	0.259877	0.233	0.483	1
Ap2a2	0.415233	0.333	0.276	1
Fto	0.354286	0.367	0.31	1
Thap4	0.329642	0.2	0.103	1
Myd88	0.266025	0.1	0.241	1
D10Wsu102e	0.25168	0.1	0.241	1
Arpc2	0.353747	0.7	0.966	1
Rgs17	0.329654	0.333	0.241	1
Fdx1	0.306692	0.567	0.655	1
Cdv3	0.294524	0.533	0.517	1
Rab2a	0.288198	0.8	1	1
Eif1ax	0.337925	0.467	0.517	1
Nme1	0.291808	0.867	1	1
Utp3	0.512223	0.333	0.276	1
Ets2	0.472396	0.433	0.448	1
Ube2q2	0.36655	0.433	0.448	1
Larp1b	0.324572	0.367	0.31	1
Capza2	0.29359	0.6	0.69	1
Snx6	0.374197	0.467	0.483	1
Nop10	0.278723	0.633	0.759	1
Smc6	0.400709	0.567	0.69	1
Map1b	0.341099	0.7	0.862	1
Ssbp2	0.380955	0.467	0.448	1
Esd	0.30363	0.7	0.897	1
Oxct1	0.289886	0.333	0.276	1
Ctnna1	0.371596	0.6	0.69	1
Galnt7	0.301959	0.367	0.31	1
Slc25a33	0.281759	0.267	0.172	1
Nelfe	0.357323	0.433	0.414	1
Glyr1	0.276991	0.433	0.448	1
Pfn1	0.370579	0.6	0.69	1
Arfgef3	0.318957	0.567	0.724	1
Snrpe	0.366499	0.633	0.862	1
Galnt11	0.591464	0.333	0.276	1
Klhdc2	0.3438	0.533	0.586	1
Uqcrc2	0.48902	0.667	0.724	1
Mrpl9	0.283372	0.267	0.172	1
Smarca5	0.457866	0.6	0.828	1
Rprd2	0.358396	0.3	0.241	1
Lncpint	0.293886	0.3	0.241	1
Gse1	0.257335	0.3	0.586	1
Tuba4a	0.616774	0.5	0.586	1
Cand1	0.265381	0.5	0.552	1
Tor3a	0.424526	0.133	0.276	1
Impdh2	0.250581	0.2	0.414	1
Copa	0.305648	0.8	0.897	1
Gtf2b	0.483175	0.4	0.379	1
Abca5	0.301143	0.4	0.379	1
Wdr18	0.42115	0.3	0.241	1
Snx14	0.361117	0.167	0.345	1
Herpud2	0.252167	0.167	0.345	1
Prpf4b	0.398529	0.7	0.897	1
Rabgap1l	0.32423	0.367	0.345	1
R3hdm1	0.485571	0.5	0.586	1
Ppp2r5c	0.347697	0.433	0.448	1
Vps29	0.457401	0.533	0.655	1
Mrpl52	0.433547	0.533	0.655	1
Actg1	0.274065	0.833	1	1
Rad23b	0.422233	0.533	0.724	1
Taf1d	0.281193	0.433	0.414	1
Mrpl23	0.346364	0.5	0.586	1
Dnttip2	0.279108	0.4	0.379	1
Syt4	0.365932	0.5	0.552	1
Utrn	0.370812	0.3	0.621	1
Eif2a	0.361105	0.433	0.483	1
Aff4	0.300596	0.633	0.724	1
A230050P20Rik	0.3195	0.3	0.241	1
Rragd	0.286884	0.167	0.345	1
Pcmt1	0.335347	0.6	0.724	1
N4bp2l2	0.405113	0.5	0.586	1
Sec62	0.284336	0.867	1	1
Cstb	0.312657	0.667	0.793	1
Tgoln1	0.326817	0.667	0.862	1
Cops3	0.270482	0.367	0.241	1
Ppp6r3	0.276145	0.433	0.414	1
Ybx3	0.401394	0.433	0.448	1
Ndel1	0.324046	0.367	0.345	1
Dld	0.492796	0.4	0.379	1
Txndc12	0.254385	0.267	0.207	1
Reps1	0.275743	0.267	0.207	1
Cyb5r4	0.261363	0.267	0.207	1
Polr1c	0.25293	0.267	0.207	1
Ppig	0.35855	0.633	0.793	1
Cox6a1	0.322256	0.667	0.759	1
Iffo1	0.381871	0.3	0.241	1
Cfl2	0.356043	0.5	0.586	1
Nop53	0.316574	0.533	0.552	1
Arhgef5	0.298571	0.333	0.31	1
Nfyb	0.450185	0.2	0.379	1
Dmap1	0.282642	0.033	0.103	1
Cklf	0.257383	0.033	0.103	1
Psmb4	0.286549	0.7	0.897	1
Spty2d1	0.34509	0.267	0.207	1
Rbms1	0.334256	0.267	0.207	1
Clptm1l	0.359237	0.5	0.621	1
Nudt2	0.271597	0.133	0.276	1
Thrap3	0.379282	0.633	0.828	1
Rbm18	0.330523	0.333	0.31	1
Mrps14	0.282874	0.6	0.621	1
Spin1	0.341875	0.333	0.276	1
Cebpg	0.490461	0.433	0.483	1
Txndc9	0.383414	0.533	0.621	1
Slc33a1	0.289439	0.467	0.517	1
Higd1a	0.350013	0.433	0.345	1
Mrps9	0.384014	0.267	0.207	1
Retreg2	0.265735	0.3	0.552	1
Gnl3l	0.326281	0.433	0.448	1
Rbmxl1	0.266831	0.333	0.31	1
Dlgap4	0.273777	0.3	0.241	1
2010107E04Rik	0.266315	0.533	0.621	1
Tmcc1	0.321817	0.267	0.483	1
Ireb2	0.293611	0.367	0.379	1
Fermt2	0.351639	0.467	0.448	1
Tram1	0.268973	0.733	0.931	1
Fam216a	0.39872	0.367	0.31	1
H2afy2	0.368488	0.333	0.276	1
Ppid	0.50899	0.367	0.345	1
Ints2	0.380361	0.233	0.172	1
C2cd3	0.317233	0.233	0.172	1
Ankrd12	0.297131	0.7	0.828	1
Nisch	0.381756	0.433	0.793	1
Kpnb1	0.293052	0.4	0.414	1
Ino80e	0.254609	0.4	0.414	1
Trir	0.255055	0.7	0.897	1
Hspa13	0.254776	0.533	0.586	1
Gtpbp4	0.324434	0.433	0.483	1
Ryk	0.436317	0.333	0.31	1
Fus	0.336697	0.7	0.862	1
Arl6ip6	0.376275	0.333	0.276	1
Arhgef12	0.310594	0.533	0.655	1
Sem1	0.320761	0.8	1	1
Rnf14	0.286737	0.5	0.552	1
Chka	0.368068	0.567	0.655	1
Khdrbs3	0.264108	0.533	0.69	1
Nubp2	0.366014	0.133	0.069	1
Tdrkh	0.337301	0.133	0.069	1
Tab2	0.255854	0.433	0.448	1
Copb1	0.271217	0.667	0.862	1
Rapgef6	0.257532	0.4	0.379	1
Sgms1	0.308717	0.267	0.207	1
Wsb1	0.295661	0.267	0.207	1
Lsm14a	0.255002	0.367	0.345	1
Acot8	0.284096	0.233	0.172	1
Ptpn4	0.254417	0.2	0.138	1
Zcchc6	0.421307	0.5	0.621	1
Vcl	0.299484	0.133	0.069	1
Jak2	0.292989	0.3	0.241	1
Sav1	0.262678	0.233	0.172	1
Sytl5	0.261686	0.233	0.172	1
Ndufa4	0.315609	0.8	0.966	1
Mapk1ip1l	0.283225	0.3	0.276	1
Wapl	0.322052	0.5	0.621	1
Qsox2	0.38195	0.4	0.379	1
Tbk1	0.335925	0.2	0.138	1
Zbtb44	0.25412	0.2	0.138	1
Gmppb	0.253515	0.4	0.448	1
Polr2h	0.578574	0.333	0.31	1
Clk3	0.252459	0.333	0.31	1
Ghitm	0.334691	0.367	0.379	1
Stag1	0.304768	0.367	0.379	1
Golga7	0.3874	0.4	0.414	1
Ints6	0.455503	0.233	0.414	1
Ufm1	0.328131	0.6	0.759	1
Pdcd6ip	0.266812	0.533	0.655	1
Prkacb	0.360202	0.633	0.897	1
Ccny	0.312253	0.3	0.276	1
Ugdh	0.3239	0.233	0.172	1
Snx13	0.284299	0.233	0.172	1
Hspb1	0.746839	0.2	0.138	1
Trappc11	0.399557	0.2	0.138	1
Arf4	0.357236	0.667	0.931	1
Rcc2	0.316123	0.2	0.379	1
Amfr	0.271916	0.4	0.414	1
Preb	0.260705	0.4	0.414	1
Rps6ka3	0.3122	0.167	0.31	1
Slc25a5	0.320817	0.833	0.931	1
Setd1b	0.309563	0.267	0.448	1
Uso1	0.259649	0.567	0.655	1
B2m	0.407042	0.6	0.724	1
Hprt	0.372914	0.633	0.828	1
Bcap31	0.276673	0.6	0.759	1
Paip2	0.266439	0.767	0.931	1
2210016F16Rik	0.45914	0.433	0.517	1
Actn1	0.456048	0.433	0.517	1
Dnajc10	0.292703	0.433	0.483	1
Mapk4	0.406274	0.233	0.172	1
Paip1	0.276361	0.4	0.69	1
Krit1	0.349803	0.567	0.759	1
Psmb2	0.422325	0.633	0.862	1
Serpina10	0.368682	0.667	0.828	1
Jak1	0.413374	0.567	0.828	1
Hilpda	0.439341	0.3	0.276	1
Gsr	0.310192	0.433	0.448	1
Ppp3ca	0.279896	0.3	0.517	1
Khdrbs1	0.255002	0.5	0.586	1
Rela	0.32105	0.2	0.345	1
Ube2z	0.455903	0.4	0.448	1
Mycbp2	0.255302	0.5	0.793	1
Tpm3	0.311197	0.467	0.552	1
Myh9	0.458414	0.533	0.655	1
Prdx5	0.293937	0.6	0.862	1
Ncapd3	0.421432	0.067	0.138	1
Wfdc16	0.323129	0.067	0.138	1
Nf2	0.281769	0.067	0.138	1
Igf2bp2	0.279399	0.067	0.138	1
Tatdn2	0.256391	0.067	0.138	1
Tank	0.292801	0.267	0.241	1
Map3k7	0.276204	0.267	0.241	1
Tmem50a	0.310077	0.533	0.655	1
Herpud1	0.39378	0.6	0.793	1
Psma4	0.343885	0.567	0.862	1
Magoh	0.287933	0.567	0.655	1
Uhrf2	0.508811	0.467	0.517	1
Ahi1	0.300472	0.4	0.724	1
Arl1	0.2597	0.633	0.897	1
Trib1	0.519677	0.433	0.517	1
Rnf7	0.266544	0.7	0.966	1
Bzw1	0.354159	0.433	0.483	1
Lsm10	0.39883	0.267	0.241	1
mt-Atp8	0.309032	0.367	0.379	1
Suclg1	0.294049	0.6	0.897	1
Cetn3	0.325051	0.5	0.586	1
Fbl	0.518691	0.467	0.517	1
Cacna1d	0.250757	0.333	0.31	1
Jmjd1c	0.393732	0.5	0.621	1
Ralgds	0.373783	0.267	0.241	1
Nbeal1	0.318644	0.433	0.552	1
Abracl	0.349339	0.367	0.586	1
Tagln2	0.351023	0.567	0.655	1
Uap1	0.658567	0.333	0.31	1
Psmc4	0.380254	0.5	0.655	1
Nfe2l2	0.341888	0.3	0.276	1
P4ha1	0.333609	0.633	0.69	1
Gorasp2	0.263005	0.567	0.759	1
Syt11	0.260844	0.367	0.345	1
Chic2	0.47314	0.4	0.414	1
Dynlt3	0.325518	0.367	0.379	1
Dab2ip	0.404785	0.367	0.379	1
Dph3	0.305579	0.467	0.552	1
Lrp11	0.298635	0.467	0.552	1
Ube2r2	0.258632	0.5	0.621	1
Ndufa5	0.284278	0.633	0.759	1
Lrba	0.412967	0.333	0.345	1
Gmps	0.278248	0.5	0.552	1
Sept10	0.667971	0.3	0.31	1
Coq10b	0.385662	0.3	0.31	1
Zyg11b	0.317152	0.233	0.414	1
Fam133b	0.372373	0.4	0.414	1
Pea15a	0.283367	0.333	0.345	1
Pxk	0.259041	0.367	0.379	1
Mapk14	0.293496	0.2	0.345	1
Ndufab1	0.309587	0.733	0.828	1
Stk32a	0.368122	0.267	0.241	1
Gadd45b	0.459419	0.4	0.483	1
Sec11c	0.29975	0.7	0.897	1
Asns	0.287877	0.333	0.345	1
Skp1a	0.328238	0.467	0.552	1
Skap2	0.257477	0.367	0.379	1
Rb1cc1	0.312882	0.467	0.586	1
Timm22	0.386263	0.2	0.345	1
Exoc6	0.257503	0.2	0.345	1
Ell	0.251431	0.233	0.207	1
Gnpnat1	0.26157	0.4	0.483	1
Gpc4	0.277714	0.3	0.276	1
Arfip1	0.365676	0.3	0.31	1
Malsu1	0.508952	0.367	0.414	1
Romo1	0.261958	0.5	0.828	1
Wsb2	0.28561	0.567	0.655	1
Tead1	0.303662	0.4	0.448	1
Clk1	0.408828	0.467	0.621	1
Zfp326	0.256213	0.333	0.379	1
Naxe	0.250462	0.267	0.448	1
Pabpc4	0.282503	0.333	0.345	1
Ggnbp2	0.304005	0.533	0.69	1
Ado	0.29258	0.1	0.172	1
Rwdd3	0.280954	0.1	0.172	1
Prkar2a	0.269129	0.1	0.172	1
Mfap1b	0.340418	0.2	0.172	1
Rnf19b	0.297834	0.2	0.172	1
Rassf4	0.268489	0.2	0.172	1
Dstn	0.424833	0.667	0.862	1
Yipf4	0.298808	0.667	0.897	1
Vma21	0.272406	0.333	0.31	1
Psmd14	0.250153	0.367	0.414	1
Dynll1	0.446178	0.633	0.759	1
March7	0.394373	0.5	0.586	1
Tpp2	0.250018	0.4	0.448	1
Chm	0.278843	0.167	0.276	1
Gnai3	0.369489	0.367	0.448	1
Smap1	0.33332	0.467	0.586	1
Ang	0.43256	0.367	0.586	1
Dyrk2	0.279009	0.333	0.345	1
Oat	0.286699	0.267	0.241	1
Lrrc14	0.359287	0.233	0.207	1
Ndufv2	0.306754	0.633	0.862	1
Rab7	0.265308	0.567	0.759	1
Elob	0.264937	0.8	1	1
St13	0.259302	0.467	0.793	1
Snrpa1	0.355192	0.367	0.414	1
Kcmf1	0.403908	0.5	0.69	1
Rrn3	0.272141	0.167	0.138	1
Mtm1	0.263429	0.167	0.138	1
Rpl13a	0.254846	0.767	0.897	1
Nhp2	0.433529	0.233	0.379	1
Lman2	0.264708	0.567	0.655	1
Ckap4	0.460098	0.467	0.586	1
Stk16	0.376293	0.433	0.517	1
Psmg4	0.36112	0.433	0.517	1
Slc35g2	0.325971	0.533	0.862	1
Trappc4	0.457447	0.533	0.724	1
Tbc1d9b	0.290395	0.2	0.31	1
Agk	0.250244	0.2	0.31	1
Riok3	0.342641	0.433	0.552	1
Slirp	0.448175	0.367	0.448	1
Seh1l	0.293296	0.333	0.31	1
Mafb	0.360222	0.2	0.172	1
Rab6a	0.291231	0.367	0.414	1
Timm8b	0.34338	0.4	0.724	1
Edem2	0.317279	0.367	0.379	1
Ccnd3	0.359233	0.267	0.276	1
Vps4a	0.258719	0.267	0.276	1
8430408G22Rik	0.787986	0.233	0.379	1
Nudt18	0.298507	0.2	0.31	1
Lims1	0.260116	0.267	0.241	1
Hspbp1	0.43774	0.167	0.138	1
Zbed4	0.364993	0.167	0.138	1
Med19	0.333247	0.233	0.207	1
Micu2	0.310711	0.233	0.207	1
Nae1	0.397664	0.333	0.517	1
Tra2a	0.301166	0.433	0.586	1
Zfp956	0.337687	0.133	0.103	1
Ssx2ip	0.33438	0.133	0.103	1
Tnip2	0.287836	0.133	0.103	1
Cul3	0.562964	0.433	0.586	1
Eif4b	0.363734	0.4	0.483	1
Pum2	0.267678	0.4	0.483	1
Mterf3	0.287782	0.3	0.345	1
Hmces	0.332725	0.3	0.31	1
Ap3b1	0.278936	0.233	0.379	1
Chac2	0.295624	0.133	0.207	1
Eno2	0.260732	0.133	0.207	1
Slc9a8	0.282186	0.133	0.103	1
Nf1	0.259646	0.167	0.241	1
Aaed1	0.488561	0.333	0.345	1
Pde4b	0.31821	0.267	0.276	1
Cdip1	0.324035	0.333	0.379	1
Cript	0.265116	0.4	0.483	1
Azin1	0.271403	0.333	0.345	1
D430042O09Rik	0.310575	0.3	0.31	1
Synj2bp	0.287463	0.433	0.517	1
Prdx2	0.307086	0.8	0.897	1
Mum1l1	0.251621	0.233	0.345	1
Slc39a9	0.414933	0.233	0.241	1
Dhx15	0.252853	0.267	0.276	1
Ssbp3	0.289424	0.367	0.414	1
Med28	0.279327	0.633	0.828	1
Nop2	0.327692	0.167	0.138	1
Fam192a	0.47984	0.333	0.414	1
Ahsa1	0.254769	0.3	0.414	1
Serinc1	0.327611	0.567	0.862	1
Ppp2r5a	0.362566	0.267	0.414	1
Hnrnpdl	0.334153	0.567	0.759	1
Itgav	0.283652	0.167	0.241	1
Eef1e1	0.258081	0.333	0.379	1
Celf1	0.382752	0.467	0.793	1
Ugp2	0.29555	0.267	0.276	1
Ppp2cb	0.399265	0.233	0.241	1
Lman2l	0.320802	0.233	0.241	1
Slc44a1	0.281171	0.233	0.241	1
Sin3b	0.250156	0.467	0.586	1
Tmem29	0.250349	0.067	0.103	1
Psmd12	0.253194	0.667	0.897	1
Cul5	0.25122	0.467	0.552	1
Cdk12	0.262181	0.333	0.517	1
Mrpl15	0.355071	0.4	0.483	1
Acadl	0.295338	0.367	0.621	1
Msmo1	0.270129	0.5	0.655	1
Snrnp48	0.253431	0.367	0.448	1
Nsd3	0.268434	0.433	0.69	1
Ptpn2	0.548479	0.333	0.379	1
Smu1	0.382131	0.333	0.379	1
Sst	2.63212	0.233	0.31	1
Phb2	0.417435	0.467	0.655	1
Mrpl17	0.335222	0.467	0.828	1
Hipk1	0.268396	0.3	0.345	1
Cct2	0.371204	0.733	0.897	1
Kifap3	0.408079	0.233	0.345	1
C2cd4b	0.291525	0.233	0.241	1
Ktn1	0.300899	0.5	0.69	1
Emsy	0.287593	0.333	0.379	1
Tspan8	0.290869	0.867	1	1
Mdn1	0.278033	0.1	0.138	1
Hnrnpr	0.268115	0.533	0.69	1
Furin	0.348007	0.233	0.241	1
Serping1	0.449749	0.4	0.621	1
Phldb2	0.480225	0.167	0.241	1
Rad50	0.434612	0.167	0.241	1
Mphosph6	0.563468	0.367	0.414	1
Jmjd6	0.336594	0.267	0.379	1
Bhlhb9	0.359863	0.3	0.414	1
mt-Nd6	0.253527	0.2	0.276	1
Pfkp	0.278176	0.267	0.379	1
Ggh	0.265665	0.4	0.621	1
Sgpp2	0.338312	0.1	0.138	1
Pak6	0.306992	0.1	0.138	1
Plxnb1	0.292397	0.1	0.138	1
Fam160a2	0.266442	0.1	0.138	1
Acly	0.343177	0.567	0.759	1
Frmd4a	0.262842	0.233	0.31	1
Hnrnpm	0.269289	0.467	0.69	1
Reep5	0.353184	0.7	0.897	1
Pkdcc	0.33468	0.4	0.517	1
Tmed5	0.285262	0.3	0.345	1
Rbm34	0.253917	0.133	0.172	1
Manbal	0.262473	0.2	0.276	1
Akap13	0.315875	0.333	0.414	1
Gemin6	0.407933	0.2	0.207	1
Appl1	0.305	0.267	0.31	1
Nt5c	0.294343	0.3	0.448	1
Pyroxd1	0.274054	0.2	0.276	1
Atox1	0.403714	0.533	0.724	1
Psmc6	0.256556	0.5	0.69	1
Mpzl1	0.296918	0.3	0.448	1
Lonp1	0.347441	0.2	0.276	1
Gpatch4	0.339629	0.2	0.276	1
Coprs	0.326734	0.233	0.241	1
Mybbp1a	0.415166	0.3	0.414	1
Tomm70a	0.288172	0.3	0.414	1
Usp8	0.260838	0.4	0.448	1
Ank3	0.298536	0.4	0.517	1
Mgat2	0.465138	0.433	0.655	1
Dcaf5	0.277109	0.267	0.31	1
Srpk1	0.322545	0.267	0.379	1
Bcor	0.511177	0.3	0.379	1
Fbxw7	0.261363	0.3	0.448	1
Bola2	0.288753	0.433	0.655	1
Flnb	0.285925	0.167	0.172	1
Ccnl1	0.267292	0.4	0.586	1
Dusp10	0.257337	0.267	0.31	1
S100a13	0.454616	0.233	0.276	1
Evl	0.362018	0.133	0.172	1
Rcc1l	0.340205	0.133	0.172	1
Ehd4	0.280103	0.133	0.172	1
Slk	0.382116	0.4	0.517	1
Fam162a	0.272179	0.367	0.483	1
Bcorl1	0.288564	0.167	0.172	1
Ddb1	0.40784	0.467	0.69	1
Degs1	0.31445	0.467	0.69	1
Sec16a	0.430076	0.3	0.448	1
Rnf145	0.28784	0.333	0.414	1
Sec23ip	0.462078	0.333	0.448	1
Cggbp1	0.380551	0.3	0.345	1
Nub1	0.335054	0.3	0.345	1
Srek1ip1	0.44628	0.133	0.138	1
Aen	0.276859	0.133	0.138	1
St18	0.28388	0.3	0.379	1
Phf8	0.252846	0.167	0.207	1
Pla2g16	0.274756	0.333	0.483	1
Itch	0.251206	0.333	0.483	1
Slc35a5	0.33586	0.167	0.172	1
Ids	0.293298	0.4	0.552	1
Zcchc9	0.355216	0.233	0.276	1
Api5	0.350363	0.367	0.483	1
Ppp2ca	0.298226	0.533	0.724	1
Tmem62	0.298905	0.133	0.138	1
Asl	0.33217	0.167	0.207	1
C77080	0.308179	0.167	0.207	1
Amn1	0.341013	0.333	0.517	1
Ttc17	0.270287	0.167	0.172	1
Bhlhe40	0.278129	0.233	0.276	1
Rasgrf2	0.304917	0.3	0.379	1
Mrpl11	0.264882	0.333	0.448	1
Efna1	0.25829	0.2	0.241	1
Ilf2	0.351945	0.4	0.586	1
Fgl1	0.482912	0.167	0.207	1
Rnaseh1	0.305396	0.133	0.138	1
Grb14	0.421455	0.3	0.414	1
Twistnb	0.278693	0.267	0.31	1
Farsb	0.408846	0.267	0.345	1
Etnk1	0.37933	0.367	0.552	1
Cdkn1a	0.338551	0.167	0.172	1
Kdm3a	0.277468	0.233	0.276	1
Atp6v1e1	0.392306	0.5	0.69	1
Shisa5	0.286652	0.4	0.552	1
Nupr1	0.526611	0.1	0.103	1
Eif2ak4	0.275787	0.1	0.103	1
Mrpl32	0.307755	0.467	0.621	1
Pak1ip1	0.482857	0.433	0.69	1
Rrp7a	0.271989	0.333	0.448	1
Commd2	0.326665	0.233	0.276	1
Pcm1	0.31277	0.4	0.586	1
Prpf8	0.250145	0.433	0.586	1
Prelid3b	0.325488	0.3	0.414	1
Mrpl21	0.297561	0.3	0.414	1
Mboat2	0.342493	0.2	0.241	1
Ifnar2	0.337132	0.2	0.241	1
Sdad1	0.306008	0.2	0.241	1
Tsta3	0.272502	0.2	0.241	1
Bach1	0.318268	0.3	0.379	1
Mfsd6	0.316795	0.167	0.207	1
Acvr1b	0.277855	0.1	0.103	1
Acadm	0.299732	0.133	0.138	1
Hspa14	0.472039	0.233	0.31	1
Nup50	0.332657	0.267	0.345	1
Kansl2	0.328998	0.267	0.345	1
Ckap5	0.30877	0.3	0.379	1
Fibp	0.304331	0.333	0.414	1
Nfx1	0.309	0.333	0.448	1
Rbm7	0.281936	0.367	0.517	1
Txlna	0.255991	0.4	0.552	1
Acbd3	0.298594	0.5	0.793	1
Creld2	0.340132	0.367	0.483	1
Cd151	0.316531	0.367	0.483	1
Syap1	0.27445	0.3	0.379	1
Eif4h	0.311735	0.533	0.69	1
Hspa4	0.297806	0.467	0.793	1
Fam149a	0.300606	0.1	0.103	1
Rbm17	0.280268	0.267	0.31	1

## Sheet: PP_markers_S3_vs_Control
Gene	Avg ln(Fold change)	Fraction cells in sample expressing gene	Fraction cells in control expressing gene	Adjusted p-value
Gbp2	2.41472	0.919	0.034	1.09501e-08
Ins2	-0.93493	0.984	1	1.43532e-08
Gbp7	1.4897	0.919	0.172	3.10431e-08
Iigp1	3.09861	0.887	0	3.99025e-08
Irgm1	1.7854	0.871	0.069	1.82553e-07
Ins1	-1.00913	0.935	1	2.75079e-07
Gbp3	1.54631	0.806	0.034	2.77972e-06
Psmb8	1.30112	0.919	0.483	5.13887e-06
Igtp	1.44815	0.774	0.034	1.09346e-05
Stat1	1.37782	0.823	0.138	1.2397e-05
Tap1	1.01355	0.774	0.069	2.21779e-05
Irf1	1.01202	0.823	0.241	0.000104569
Bst2	1.00021	0.742	0.103	0.000169442
Irgm2	0.907536	0.645	0	0.000896246
Cd274	0.941917	0.661	0.069	0.00401694
Psmb9	0.801373	0.774	0.345	0.00509481
B2m	0.905183	0.887	0.724	0.0100327
Tpt1	0.354368	0.984	1	0.0138206
Unc13a	-0.362223	0.032	0.448	0.0150793
Tapbp	0.75873	0.903	0.793	0.0153036
Rps21	0.511044	0.984	1	0.0195411
Serping1	1.03485	0.806	0.621	0.0257341
Sec23a	-0.265103	0.065	0.517	0.0372933
Psme1	0.743854	0.839	0.724	0.0399569
Eef1a1	0.46937	1	1	0.0583967
Gm4951	0.679851	0.516	0	0.0610626
Atf5	-0.291541	0.113	0.621	0.0766869
Pgls	-0.511776	0.435	0.966	0.0832069
Mettl1	-0.378605	0.226	0.793	0.0957889
H2-T23	0.758319	0.823	0.69	0.106142
H2-D1	0.557172	0.968	1	0.121195
Pfkl	-0.539054	0.194	0.724	0.131485
Rtp4	0.629988	0.516	0.034	0.150981
H1f0	-0.425024	0.242	0.793	0.152291
Ifi47	0.722502	0.484	0	0.158404
Aldoa	-0.929055	0.774	1	0.173564
Ampd2	-0.278625	0.129	0.586	0.186569
Pla2g16	0.711598	0.758	0.483	0.196376
Gstp1	-0.255252	0.032	0.379	0.229743
Gbp4	0.904181	0.468	0	0.251571
Fahd1	-0.28478	0.113	0.552	0.28893
Selenop	0.669265	0.952	1	0.309723
Pappa2	-0.461802	0.306	0.828	0.47032
Psmb10	0.710392	0.823	0.621	0.488488
AW112010	0.883173	0.532	0.103	0.498267
Snx10	0.697796	0.79	0.621	0.506448
Lpl	-0.454135	0.29	0.793	0.518542
Coq7	-0.379916	0.161	0.621	0.521639
Gm12216	0.693062	0.677	0.414	0.532085
Hnrnpa1	0.767496	0.758	0.655	0.882371
Il18bp	0.799108	0.677	0.379	0.928321
mt-Nd3	0.527166	0.968	1	0.946503
F830016B08Rik	0.964702	0.419	0	0.955266
Serpina7	-0.290719	0.032	0.345	1
Serf2	-0.457462	0.903	1	1
Gbp6	0.508347	0.403	0	1
Mrpl28	-0.298986	0.177	0.655	1
Cd47	0.488839	0.935	0.931	1
Gbp10	0.554659	0.387	0	1
Eno1	-0.402875	0.226	0.69	1
Dazap1	-0.277151	0.161	0.586	1
Xaf1	0.583031	0.419	0.034	1
Psme2	0.597075	0.887	0.828	1
Mrpl57	-0.345057	0.419	0.828	1
Psma5	0.517463	0.79	0.655	1
Rpl39	0.494078	0.968	1	1
Tnfsf10	0.429195	0.371	0	1
Vat1l	-0.257484	0.145	0.586	1
Ifit1	0.599208	0.452	0.069	1
Syt7	-0.296686	0.403	0.897	1
Ap2s1	-0.266606	0.29	0.759	1
Dnm3	0.775056	0.645	0.414	1
Rps10	-0.27566	0.984	1	1
Parp9	0.526472	0.516	0.138	1
Hgfac	-0.294596	0.242	0.69	1
C1qa	-0.283619	0.081	0.414	1
Tra2a	0.567928	0.742	0.586	1
Psmc3	-0.315189	0.274	0.724	1
Sdf2l1	-0.342063	0.29	0.724	1
Cenpv	-0.390529	0.355	0.793	1
Abcc8	-0.366936	0.758	0.966	1
Gapdh	-0.695416	0.871	1	1
mt-Nd1	0.418883	0.984	1	1
Fam102a	-0.276631	0.161	0.552	1
Ldlr	-0.303694	0.226	0.655	1
Laptm4a	0.443691	0.968	0.966	1
Fgb	0.844095	0.677	0.414	1
Pdia4	-0.320947	0.403	0.862	1
Vcp	-0.275537	0.645	1	1
Fdps	-0.312882	0.242	0.655	1
Cul3	0.492249	0.726	0.586	1
Lamp2	0.390183	0.887	0.966	1
Hdlbp	-0.28132	0.645	0.966	1
Ddx5	0.328952	0.952	1	1
H2-K1	0.575209	0.968	1	1
P4ha1	-0.43735	0.306	0.69	1
Bbx	0.471052	0.806	0.759	1
Vdac1	-0.281656	0.355	0.897	1
mt-Nd2	0.418735	0.984	1	1
Serpina10	0.550617	0.871	0.828	1
Tap2	0.506895	0.613	0.379	1
Pkm	-0.463226	0.903	0.966	1
Ifi35	0.459039	0.516	0.172	1
Mt2	-0.334727	0.21	0.621	1
Atp5h	-0.315317	0.871	0.966	1
Ube2l6	0.562649	0.581	0.345	1
Bloc1s2	-0.26713	0.113	0.448	1
Stub1	-0.336799	0.565	0.931	1
Ncoa7	0.594673	0.677	0.448	1
Cited2	-0.327096	0.242	0.586	1
Ndufa11	-0.30618	0.565	0.966	1
Ola1	-0.266751	0.323	0.793	1
Gbp9	0.536354	0.29	0	1
Zbtb7a	-0.286673	0.419	0.828	1
Fis1	-0.299365	0.516	0.931	1
Parp12	0.465336	0.516	0.241	1
Klhdc8b	-0.252813	0.097	0.379	1
Sncb	-0.265977	0.048	0.276	1
Rps20	0.302171	0.984	1	1
Ctso	0.437036	0.645	0.517	1
Socs1	0.516673	0.323	0.034	1
mt-Nd4	0.293984	0.952	1	1
Tsfm	-0.255579	0.177	0.517	1
Oasl2	0.338627	0.323	0.034	1
Cisd1	-0.344527	0.661	0.931	1
Sfrp5	-0.310221	0.129	0.414	1
Fxyd6	-0.315338	0.145	0.448	1
P4ha2	-0.2804	0.145	0.448	1
Eloc	-0.289251	0.468	0.931	1
Idnk	0.415456	0.694	0.552	1
Ppp1r14b	-0.275067	0.516	0.862	1
Atf4	-0.302204	0.371	0.828	1
Ndufb6	-0.259124	0.387	0.828	1
Tgtp2	0.290068	0.258	0	1
Ifit3	0.453267	0.306	0.034	1
Stat2	0.450467	0.452	0.207	1
Tspan8	0.378024	0.935	1	1
Psmb5	-0.303123	0.661	0.966	1
Phip	0.484895	0.79	0.655	1
Fam183b	-0.282298	0.597	0.966	1
Rnf115	0.456639	0.581	0.345	1
Sh3bgrl	0.436413	0.597	0.414	1
Mif	-0.74961	0.677	0.862	1
Ormdl3	-0.257472	0.355	0.69	1
Tmem140	0.461185	0.452	0.207	1
Ubr4	-0.301668	0.339	0.69	1
Ifitm2	-0.33178	0.484	0.862	1
Tgtp1	0.324302	0.242	0	1
Ppa1	0.440821	0.806	0.793	1
Cox5b	-0.278871	0.758	1	1
Pdcd4	0.544715	0.726	0.759	1
Clk1	0.40042	0.661	0.621	1
Pde4d	-0.312113	0.226	0.552	1
Tpi1	-0.53884	0.532	0.862	1
Wnt4	-0.43162	0.694	0.931	1
Spcs1	0.462987	0.871	0.862	1
Nav2	0.491263	0.823	0.793	1
Rbp4	-0.301259	0.629	1	1
Trappc6a	-0.253104	0.177	0.483	1
Tecr	-0.294736	0.565	0.931	1
Cd82	-0.259051	0.097	0.345	1
Fam210b	0.390722	0.645	0.483	1
Rtn4	0.372751	0.79	0.862	1
Ly6e	0.473684	0.71	0.621	1
Mitd1	0.288187	0.323	0.069	1
Sec61g	0.295713	0.935	1	1
Zbp1	0.401874	0.274	0.034	1
Eif3e	0.485053	0.694	0.586	1
Mgarp	-0.271393	0.081	0.31	1
Pomp	0.344144	0.887	1	1
Pbx1	0.35221	0.79	0.724	1
Reep5	-0.26841	0.5	0.897	1
Rps28	0.446377	0.919	1	1
Gstm1	-0.250737	0.194	0.517	1
Psma7	0.368961	0.871	0.931	1
Supt4a	-0.277103	0.242	0.586	1
Hras	-0.31097	0.339	0.655	1
Ftl1	-0.397914	0.984	1	1
Limch1	0.35557	0.387	0.138	1
Egr1	0.523812	0.823	0.759	1
Gbp8	0.471746	0.21	0	1
Usp18	0.414558	0.435	0.172	1
Plgrkt	0.44018	0.5	0.31	1
Rtn1	0.356386	0.387	0.138	1
Serinc1	0.304174	0.79	0.862	1
Tsc22d1	0.371927	0.774	0.759	1
Tax1bp1	0.32003	0.871	0.931	1
Khdrbs3	0.476377	0.694	0.69	1
9930111J21Rik2	0.264638	0.194	0	1
Gm12185	0.259323	0.194	0	1
Ube2l3	-0.253166	0.516	0.862	1
Wars	0.508037	0.468	0.276	1
Bsg	-0.300967	0.984	1	1
Zfp292	0.458107	0.661	0.621	1
Btf3	0.32566	0.903	1	1
Sppl2a	0.328553	0.565	0.379	1
Pam	0.480248	0.919	0.966	1
Tesc	-0.268414	0.29	0.586	1
Gpi1	-0.547542	0.5	0.793	1
Rpp21	-0.257587	0.194	0.448	1
Cenpb	-0.251806	0.371	0.69	1
Zbtb20	0.426497	0.952	1	1
Fxyd3	-0.341232	0.258	0.552	1
Nkx6-1	-0.30145	0.419	0.69	1
Rprd2	0.38398	0.419	0.241	1
Rpl35a	0.266809	0.984	1	1
Snhg11	-0.467892	0.065	0.241	1
Epb41l2	0.283842	0.177	0	1
Parp14	0.422674	0.419	0.241	1
Rps29	0.285307	0.984	1	1
Ndufa8	-0.258301	0.581	0.897	1
Hnrnpa0	0.456207	0.5	0.379	1
Rpl6	0.273199	0.984	1	1
Uqcr11	-0.261659	0.71	0.897	1
Atp11a	0.319729	0.387	0.172	1
Prr13	0.350799	0.597	0.483	1
Ankrd12	0.379693	0.823	0.828	1
Tm4sf4	0.36938	0.919	1	1
Txnip	-0.259235	0.419	0.759	1
Usp9x	0.403833	0.742	0.793	1
Fyttd1	0.328445	0.468	0.31	1
Cox6c	0.38091	0.952	0.862	1
Ywhab	0.326696	0.645	0.552	1
Chgb	0.254644	0.968	1	1
Pcf11	0.35262	0.484	0.345	1
Cnot4	0.294589	0.435	0.241	1
Peg3	0.401315	0.919	1	1
S100a1	-0.329985	0.258	0.517	1
Papola	0.387904	0.823	0.828	1
Iapp	-0.489648	0.968	1	1
Ap3s1	0.390997	0.565	0.414	1
Saraf	0.327017	0.79	0.897	1
R3hdm1	0.405488	0.661	0.586	1
Akap13	0.314136	0.548	0.414	1
Gadd45g	0.565097	0.548	0.448	1
Aida	0.372119	0.403	0.241	1
Ifit2	0.501099	0.145	0	1
Cnot6l	0.527909	0.758	0.724	1
Dnajc12	0.464488	0.71	0.828	1
Tapbpl	0.343934	0.516	0.414	1
Mbd2	0.468298	0.581	0.586	1
Meis2	0.276771	0.903	0.931	1
Atf1	0.317738	0.435	0.276	1
Apobec3	0.310199	0.5	0.379	1
Id3	-0.610611	0.339	0.517	1
Tmbim4	0.31678	0.839	0.931	1
Rnf213	0.324197	0.274	0.103	1
Lamtor2	-0.27272	0.548	0.862	1
F3	0.340065	0.194	0.034	1
Trim12c	0.279933	0.274	0.103	1
Arf1	0.393954	0.823	0.897	1
Gpc4	0.331046	0.452	0.276	1
Neat1	-0.256025	0.806	0.966	1
Rps12	0.28249	1	1	1
Dnaja2	0.323149	0.629	0.621	1
2810474O19Rik	0.292917	0.5	0.31	1
Ncor1	0.415812	0.823	0.931	1
Zfp945	0.291599	0.371	0.207	1
Zfp207	0.361287	0.548	0.448	1
Rbck1	0.256605	0.468	0.345	1
Abhd16a	0.331069	0.565	0.483	1
Herc6	0.343446	0.355	0.207	1
Ptprt	0.318756	0.581	0.379	1
Purb	0.265213	0.548	0.414	1
Mtdh	0.266357	0.855	0.793	1
Stxbp1	0.280131	0.581	0.552	1
Erap1	0.321661	0.484	0.379	1
Ptpn1	0.415654	0.645	0.724	1
Ifi27	0.541354	0.5	0.414	1
Cpq	0.277365	0.855	1	1
Tnrc6b	0.29074	0.694	0.655	1
Glul	0.37849	0.516	0.345	1
Nfat5	0.388345	0.694	0.69	1
Ndufb3	-0.267315	0.661	0.862	1
Defb1	0.294742	0.306	0.138	1
Zcchc11	0.281964	0.71	0.724	1
Rnf139	0.285253	0.339	0.207	1
Gnas	0.316035	1	1	1
Samhd1	0.330643	0.258	0.103	1
Arfgef1	0.302605	0.694	0.655	1
Glyr1	0.417187	0.484	0.448	1
Tmem256	-0.298247	0.419	0.793	1
Glud1	0.360255	0.581	0.517	1
Nts	1.32991	0.113	0	1
2010107E04Rik	0.277638	0.629	0.621	1
Fus	0.339284	0.774	0.862	1
Ocrl	0.306341	0.645	0.586	1
Tmsb4x	-0.340547	0.887	0.931	1
Lgals3bp	0.315244	0.919	1	1
App	0.316971	0.71	0.724	1
Ssbp2	0.369223	0.516	0.448	1
Kmt2a	0.398344	0.661	0.69	1
Rpl36a	0.321969	0.935	0.966	1
Zc3hav1	0.329922	0.435	0.345	1
Gtpbp8	0.255503	0.161	0.034	1
G3bp2	0.346829	0.823	0.897	1
Shc1	0.393618	0.452	0.345	1
Eif2ak2	0.264491	0.387	0.276	1
Ifitm3	0.389732	0.161	0.034	1
Zfp280d	0.28579	0.435	0.31	1
Arg1	0.30857	0.323	0.172	1
Clu	0.60979	0.806	0.931	1
Mt1	-0.391881	0.71	0.862	1
Pogz	0.256631	0.242	0.103	1
Acat1	0.339924	0.629	0.517	1
Il1r1	0.377238	0.694	0.621	1
Rpl29	0.296248	0.952	0.966	1
Efr3a	0.432013	0.548	0.552	1
Brd1	0.289347	0.371	0.241	1
Herc1	0.430987	0.532	0.483	1
Fgl2	0.374126	0.774	0.724	1
Gclm	0.309349	0.806	0.966	1
Kcnb1	0.367226	0.419	0.31	1
Ghitm	0.300495	0.468	0.379	1
Shisa5	0.301003	0.548	0.552	1
Glo1	0.295035	0.742	0.828	1
Prdx5	0.298455	0.823	0.862	1
Map3k2	0.311773	0.435	0.31	1
Ctsl	0.35246	0.968	1	1
Uhrf2	0.263293	0.565	0.517	1
Hnrnph1	0.352519	0.694	0.828	1
Tmem263	0.2528	0.387	0.276	1
Kars	0.437363	0.403	0.31	1
Prom1	0.266668	0.306	0.207	1
Grina	0.273045	0.419	0.345	1
Arhgap29	0.253197	0.29	0.172	1
Itfg1	0.256815	0.581	0.517	1
Tor1aip2	0.356272	0.532	0.552	1
Map2	0.362296	0.629	0.69	1
Nudt13	0.336086	0.419	0.345	1
Sik3	0.283757	0.387	0.276	1
Pcm1	0.299522	0.613	0.586	1
Tpm3	0.272039	0.548	0.552	1
AI467606	0.280196	0.177	0.069	1
Fam216a	0.381971	0.403	0.31	1
Ep400	0.334137	0.468	0.379	1
Zbtb41	0.321706	0.226	0.103	1
Pfkfb3	0.304712	0.177	0.069	1
Zranb2	0.271761	0.597	0.586	1
Bambi	0.280421	0.694	0.655	1
Ttc14	0.331847	0.629	0.724	1
Hpf1	0.250171	0.452	0.448	1
Nmi	0.253154	0.355	0.276	1
Med13	0.274952	0.435	0.379	1
Csnk1g1	0.25132	0.355	0.241	1
Tgoln1	0.368571	0.823	0.862	1
Sh3glb1	0.277804	0.774	0.793	1
Rab5c	0.345569	0.484	0.448	1
Etv1	0.313507	0.903	0.966	1
Nbeal1	0.300111	0.516	0.552	1
Tjp1	0.292532	0.403	0.31	1
Gpbp1l1	0.262927	0.387	0.345	1
Smim10l1	0.283233	0.726	0.793	1
Sp3	0.265128	0.29	0.207	1
Mapk1ip1l	0.377075	0.339	0.276	1
Fryl	0.396766	0.468	0.483	1
Slc40a1	0.301417	0.484	0.517	1
Zcchc6	0.427051	0.548	0.621	1
Irf2	0.333846	0.468	0.448	1
Ccdc186	0.253964	0.532	0.552	1
Eif4b	0.303952	0.5	0.483	1
Nfasc	0.274956	0.581	0.69	1
Pdcd10	0.275942	0.645	0.69	1
Tmem50a	0.274047	0.581	0.655	1
Plcb4	0.264718	0.468	0.414	1
Ier2	0.266551	0.548	0.483	1
Wbp11	0.265835	0.435	0.345	1
Atp2b4	0.259499	0.306	0.207	1
Camk2n1	0.273431	0.871	0.966	1
Twsg1	0.394948	0.629	0.724	1
Rps8	0.26528	0.984	1	1
March8	0.255519	0.5	0.517	1
Trim21	0.251198	0.161	0.069	1
Rab10	0.26468	0.597	0.621	1
Copg2	0.266918	0.258	0.172	1
Pgam1	-0.317359	0.774	0.931	1
Ctdspl	0.254286	0.355	0.31	1
Tbc1d22a	0.315027	0.113	0.034	1
Rhobtb2	0.251778	0.113	0.034	1
Pak3	0.398736	0.548	0.621	1
Isg20	0.291783	0.758	0.724	1
Basp1	0.393077	0.339	0.276	1
Atp2b1	0.294897	0.758	0.897	1
Ankrd17	0.258753	0.581	0.621	1
Atf7ip	0.294862	0.355	0.276	1
Scgn	0.251754	0.726	0.862	1
Nap1l1	0.276541	0.694	0.793	1
Trove2	0.327216	0.5	0.517	1
Zfr	0.314902	0.613	0.724	1
Junb	0.338708	0.677	0.69	1
Tmem33	0.280881	0.468	0.448	1
Rgs4	0.719375	0.484	0.483	1
Marcks	0.351907	0.484	0.483	1
Rab27b	0.359369	0.339	0.276	1
Rora	0.266547	0.565	0.517	1
Ash1l	0.279243	0.758	0.793	1
Bcl11a	0.276504	0.355	0.31	1
Hlcs	0.273732	0.177	0.103	1
Ubl3	0.268599	0.839	0.862	1
Baz2a	0.28653	0.5	0.517	1
Mcl1	0.26503	0.532	0.552	1
Zfp612	0.300257	0.419	0.379	1
Tmem30a	0.251518	0.742	0.793	1
Ypel5	0.260377	0.339	0.276	1
Syt11	0.286684	0.403	0.345	1
Pak2	0.35576	0.565	0.655	1
Lage3	0.299366	0.435	0.414	1
Fam49b	0.25013	0.548	0.552	1
Stat3	0.369945	0.71	0.828	1
Fam159b	0.411717	0.355	0.31	1
Ccar1	0.255997	0.581	0.586	1
Ktn1	0.25318	0.581	0.69	1
Txnrd1	0.304135	0.597	0.724	1
Samd9l	0.302407	0.355	0.345	1
Klhl24	0.329951	0.306	0.241	1
Dst	0.277622	0.903	0.897	1
Sgms2	0.299794	0.258	0.207	1
Eif1a	0.263639	0.532	0.586	1
Sec24b	0.284034	0.29	0.241	1
Lrpprc	0.274118	0.532	0.552	1
Uty	0.257189	0.274	0.241	1
Pgk1	-0.336735	0.629	0.724	1
Carmil1	0.314864	0.226	0.172	1
Irf9	0.254056	0.274	0.207	1
Tuba4a	0.254521	0.468	0.586	1
Slc35a5	0.271234	0.242	0.172	1
Cacna2d1	0.264206	0.629	0.69	1
Cfi	0.295236	0.306	0.276	1
Polr2k	0.44268	0.435	0.483	1
Trappc6b	0.265869	0.677	0.793	1
Rabgap1	0.28585	0.452	0.517	1
Tbc1d23	0.375862	0.387	0.448	1
Fndc3b	0.284473	0.532	0.621	1
Clcn3	0.260271	0.742	0.759	1
Kdm1a	0.25114	0.548	0.655	1
Hap1	0.299709	0.548	0.69	1
Ccny	0.277192	0.29	0.276	1
Rtn3	0.254874	0.726	0.828	1
Sst	2.43814	0.355	0.31	1
Mtf1	0.279943	0.242	0.207	1
Gmps	0.309172	0.532	0.552	1
Tmem203	0.273083	0.145	0.241	1
Cdh2	0.290133	0.548	0.724	1
Eif3h	0.268414	0.79	0.931	1
Rc3h1	0.276051	0.226	0.379	1
Setd2	0.311318	0.452	0.483	1
Bmpr1a	0.250474	0.516	0.552	1
Ociad2	0.258628	0.484	0.621	1
Bnip3	-0.319597	0.452	0.483	1
Galnt1	0.298478	0.339	0.31	1
Errfi1	0.255381	0.242	0.207	1
Fos	0.293555	0.419	0.414	1
Asap1	0.306927	0.226	0.207	1
Armcx4	0.25589	0.194	0.172	1
Car8	0.258552	0.065	0.103	1
Hspb1	0.734935	0.161	0.138	1
Mical3	0.269226	0.419	0.483	1
mt-Nd4l	0.279454	0.661	0.69	1
Acbd6	0.250513	0.403	0.483	1
Golim4	0.251534	0.5	0.655	1
Ttc39b	0.268648	0.387	0.448	1
Cebpd	0.439998	0.371	0.414	1
Xrn1	0.278411	0.452	0.586	1
Tmem5	0.28409	0.323	0.379	1
Per3	0.272515	0.371	0.448	1
Socs3	0.283073	0.419	0.517	1
Kctd12b	0.252595	0.258	0.276	1
Scn3a	0.337918	0.5	0.586	1
Arfgef3	0.26616	0.565	0.724	1
Pja2	0.319666	0.565	0.828	1
Mapk14	0.252308	0.242	0.345	1
Cep350	0.309449	0.371	0.448	1
Hipk1	0.289147	0.306	0.345	1
Ahi1	0.283089	0.484	0.724	1
Gdi1	0.313094	0.435	0.621	1
Dbpht2	0.374968	0.548	0.655	1

## Sheet: PP_markers_S4_vs_Control
Gene	Avg ln(Fold change)	Fraction cells in sample expressing gene	Fraction cells in control expressing gene	Adjusted p-value
Gbp3	2.56923	1	0.034	7.71199e-09
Irgm1	1.78457	1	0.069	9.56301e-09
Gbp2	3.278	0.974	0.034	2.58873e-08
Ins1	-2.79065	0.947	1	5.38962e-08
Ins2	-2.81258	1	1	5.38962e-08
Iigp1	2.36815	0.947	0	5.95486e-08
Cebpd	2.30799	1	0.414	1.15845e-07
B2m	1.5226	1	0.724	3.61066e-07
H2-D1	0.967374	0.974	1	4.1909e-07
Irf1	1.84823	0.947	0.241	5.21339e-07
Psmb8	1.39059	1	0.483	5.3232e-07
Hist3h2ba	-0.855167	0.026	0.828	8.97191e-07
Gbp7	1.54246	0.921	0.172	1.03164e-06
Tap1	1.23947	0.895	0.069	1.3395e-06
Igtp	1.40356	0.868	0.034	2.37709e-06
Stat1	1.4086	0.895	0.138	3.7383e-06
Fam183b	-0.942378	0.211	0.966	4.17648e-06
Clic4	1.57219	0.921	0.414	6.97053e-06
Sod2	1.64714	0.947	0.69	8.89223e-06
Neurl3	2.13188	0.816	0	1.05422e-05
Icam1	2.08072	0.816	0	1.05422e-05
Marcks	1.13365	0.947	0.483	1.70276e-05
C1qtnf4	-0.675619	0.158	0.931	2.07617e-05
Psme1	0.976522	1	0.724	2.85037e-05
Gm42418	-0.717628	1	1	3.49441e-05
Ctxn2	-0.568556	0.026	0.724	4.90735e-05
Isg20	1.22673	0.974	0.724	6.59414e-05
Cxcl10	3.44137	0.763	0	6.89144e-05
Gbp4	1.76413	0.763	0	6.89144e-05
Gbp5	1.18389	0.763	0	6.89144e-05
Wnt4	-1.18409	0.289	0.931	7.93299e-05
Nfkbia	1.94383	0.868	0.345	0.00013525
Defb1	1.78147	0.816	0.138	0.000147168
H2-K1	0.819685	1	1	0.000181112
Psme2	1.08951	0.974	0.828	0.000188141
H3f3a	-0.848116	0.921	1	0.000265192
Tbrg1	0.717471	1	0.966	0.000267715
Pnp	1.23475	0.868	0.379	0.000329752
Ccl2	2.51599	0.711	0	0.000406949
Gbp6	1.29303	0.711	0	0.000406949
Serpina10	1.03835	0.974	0.828	0.000422349
Slc2a5	-0.741357	0.237	0.897	0.000474079
Cd274	0.927491	0.763	0.069	0.000606123
Basp1	1.42457	0.842	0.276	0.000712978
Tnfsf10	0.745068	0.684	0	0.000953603
Birc3	0.896089	0.737	0.103	0.00147116
Psmb10	0.930763	0.947	0.621	0.00164614
Rcan3	-0.426707	0.026	0.621	0.00192857
Gatsl2	-0.559594	0.132	0.828	0.0020272
Tapbp	0.896703	0.947	0.793	0.00205289
Socs1	0.974988	0.684	0.034	0.00209437
Pigp	-0.633638	0.289	0.897	0.00215517
Pla2g16	0.919208	0.895	0.483	0.00229086
Rflna	-0.531352	0.132	0.828	0.00236152
Usp34	-0.561265	0.263	0.897	0.00257736
Psmb9	0.938498	0.842	0.345	0.00260509
Snx10	0.871418	0.895	0.621	0.00437285
Gpx1	0.747358	0.868	0.621	0.00468288
Gbp9	1.09892	0.632	0	0.00488614
Ifi47	1.01685	0.632	0	0.00488614
Syt13	-0.766238	0.342	0.931	0.00494253
Tlr2	0.976012	0.658	0.034	0.00496728
Dtx3l	0.713529	0.684	0.069	0.00507498
Sppl2a	0.737685	0.868	0.379	0.00704302
Gm12216	0.611539	0.842	0.414	0.00806189
Glul	1.05776	0.842	0.345	0.00902053
Mageh1	-0.688912	0.342	0.966	0.00976989
Tubb5	0.872505	0.895	0.759	0.00997997
Pnrc1	1.15641	0.868	0.793	0.0106564
Ank	-0.554497	0.053	0.621	0.0113934
Rtp4	0.833377	0.632	0.034	0.0115009
Zfp608	-0.515075	0.211	0.862	0.011655
Vmp1	0.872171	0.895	0.517	0.0121907
Ube2l6	0.686088	0.816	0.345	0.0127849
Sbno2	0.878833	0.737	0.241	0.0138798
Nfkb1	0.693784	0.763	0.241	0.013913
Smarca2	-0.496829	0.132	0.759	0.015398
Il18bp	0.753392	0.868	0.379	0.01569
Psma5	0.723388	0.895	0.655	0.0168909
Papss1	-0.379163	0.105	0.724	0.0179787
Nkx2-2	-0.546777	0.053	0.621	0.0199105
Gria2	-0.543597	0.237	0.862	0.0206767
Rhoc	0.805313	0.816	0.345	0.0217212
Parp14	0.996892	0.737	0.241	0.0238899
Hepacam2	-0.440372	0.079	0.69	0.0246832
Mettl26	-0.576419	0.342	0.897	0.0249851
AW112010	2.24518	0.658	0.103	0.0251551
Epb41l3	-0.430038	0.158	0.724	0.0304407
Cxxc5	-0.537273	0.263	0.759	0.0317091
Tmbim4	0.607356	0.974	0.931	0.0333873
Stim1	-0.356909	0.053	0.621	0.0371528
Cplx2	-0.548929	0.447	0.897	0.0374526
Atp1a1	-0.673966	0.447	0.966	0.0374847
Nav1	-0.320977	0	0.483	0.0376639
Kcnmb2	-0.45406	0	0.483	0.0376639
Chchd10	-0.58789	0.237	0.828	0.0385222
Sqstm1	0.935713	0.868	0.655	0.0400759
H2-T23	0.73854	0.868	0.69	0.0423692
Arrdc4	0.938754	0.658	0.138	0.0426507
Etv1	-0.66605	0.421	0.966	0.0468998
Syt7	-0.559673	0.289	0.897	0.0470959
Znrf1	0.840941	0.789	0.448	0.0565059
4930539E08Rik	1.50809	0.605	0.069	0.0591287
Mocs2	0.694872	0.789	0.517	0.0600559
Ier3	1.15459	0.632	0.069	0.063847
Camk2b	-0.504871	0.158	0.759	0.0710252
Pnmal2	-0.691071	0.316	0.828	0.0725259
Clic1	0.712324	0.947	0.724	0.0810315
Scg3	-0.575014	0.842	1	0.0833572
Psma7	0.593719	0.974	0.931	0.0891281
8430408G22Rik	1.49228	0.763	0.379	0.0894911
Nrtn	-0.437414	0.026	0.517	0.0913119
Pgls	-0.604563	0.474	0.966	0.0915966
Bst2	0.655846	0.632	0.103	0.0921696
Dio1	-0.490526	0.158	0.724	0.0921696
Chmp4b	0.6945	0.842	0.517	0.0959487
Zdbf2	-0.594419	0.158	0.69	0.0965065
Nfkbiz	0.779849	0.632	0.103	0.105487
Ndufa4	-0.592225	0.421	0.966	0.111595
Rimbp2	-0.512933	0.105	0.621	0.115906
Cxxc4	-0.449462	0.132	0.724	0.11833
Nudt4	-0.428905	0.053	0.552	0.121412
Rps20	0.393262	1	1	0.123293
Cyb5r3	-0.552923	0.421	0.931	0.126015
Chmp3	-0.401511	0.211	0.862	0.136907
P3h4	-0.373355	0.211	0.793	0.14001
Pfkfb3	0.905178	0.579	0.069	0.143591
Litaf	0.633226	0.579	0.069	0.143591
Fbxo21	-0.305069	0.079	0.621	0.144603
Cenpx	-0.423352	0.132	0.69	0.145252
Btg1	0.850736	0.895	0.621	0.15263
Sphkap	-0.545917	0.132	0.655	0.153781
Fry	-0.36567	0.053	0.552	0.164241
Pnmal1	-0.415851	0.079	0.621	0.166787
Igfbp7	-0.83017	0.289	0.828	0.171063
Mvp	0.727246	0.763	0.414	0.173075
Dbpht2	-0.556473	0.132	0.655	0.176272
Atpif1	-0.538672	0.789	1	0.17847
Gstm5	-0.385987	0.263	0.897	0.18554
Rnf103	-0.344899	0.053	0.552	0.190736
Apobec3	0.632909	0.737	0.379	0.193916
Nos2	1.34739	0.5	0	0.200199
Ifit2	0.834486	0.5	0	0.200199
Tapbpl	0.700553	0.763	0.414	0.207176
Hmgn3	-0.629998	0.421	0.897	0.228518
Slc37a1	0.589801	0.658	0.172	0.24014
Gmpr	-0.547259	0.316	0.828	0.251601
Samd9l	0.742614	0.737	0.345	0.254904
Parp9	0.657431	0.684	0.138	0.255757
S100a10	0.837375	0.763	0.448	0.257174
Ppa1	0.73971	0.868	0.793	0.260528
Rab7	0.524616	0.895	0.759	0.260528
Ifit1	0.904443	0.579	0.069	0.26415
Ypel3	-0.437506	0.184	0.724	0.265027
Psma2	0.49062	0.974	0.931	0.271747
Spon2	-0.283094	0	0.414	0.274811
Gatm	-0.289392	0	0.414	0.274811
Fahd1	-0.310125	0.053	0.552	0.275989
Mid1ip1	-0.511699	0.184	0.724	0.282495
Slc25a23	-0.315912	0.026	0.483	0.282527
Xbp1	0.753025	0.947	0.966	0.287726
Ripk2	0.743838	0.605	0.103	0.319215
Serping1	0.637086	0.895	0.621	0.324671
Pla2g12a	-0.477155	0.316	0.862	0.332566
Ehf	0.705625	0.632	0.172	0.336703
Slc3a2	0.666805	0.868	0.69	0.340868
Mrps33	-0.568732	0.632	1	0.350691
Fgd2	-0.272802	0.026	0.483	0.356822
Ndufa11	-0.447133	0.553	0.966	0.366315
Ociad2	-0.325189	0.105	0.621	0.376723
Junb	1.05075	0.895	0.69	0.377618
Stat2	0.623341	0.632	0.207	0.395479
Steap4	1.14094	0.474	0	0.396839
Csf1	0.765241	0.474	0	0.396839
Tifa	0.713677	0.474	0	0.396839
Isg15	0.912416	0.526	0.034	0.426825
Gcg	-1.88588	0.632	0.966	0.43101
Ucp2	-0.616895	0.605	0.966	0.433436
Kdm2a	-0.365794	0.158	0.724	0.442112
Dcaf17	-0.366467	0.026	0.448	0.455531
Arf1	0.554209	0.947	0.897	0.476468
Cirbp	-0.460862	0.395	0.862	0.478644
Gtf3a	-0.31133	0.105	0.621	0.492559
Ssr4	-0.388693	0.974	1	0.493849
Coa6	-0.366091	0.053	0.517	0.52059
Tma7	-0.410523	0.711	0.966	0.521519
Zbp1	0.933551	0.5	0.034	0.546868
Eva1b	-0.379657	0.184	0.69	0.550507
Prdx6	-0.445385	0.395	0.931	0.577441
Atf4	0.627193	0.947	0.828	0.590812
Pomp	0.490455	0.974	1	0.596253
Ift57	-0.366131	0.211	0.724	0.623998
Alcam	0.482676	0.921	0.897	0.644033
Gm30648	-0.29393	0.053	0.483	0.672016
Rab37	-0.342921	0.105	0.586	0.683579
Commd9	-0.4097	0.158	0.69	0.683711
Mafa	-0.276351	0	0.379	0.714891
Runx1t1	-0.304479	0	0.379	0.714891
Ift20	-0.476102	0.605	0.966	0.7151
Maml3	-0.314101	0.158	0.724	0.727248
Arid1a	-0.33783	0.237	0.828	0.730212
Sult1d1	-0.401872	0.079	0.517	0.750987
Arglu1	-0.419746	0.395	0.931	0.764949
Ndufb10	-0.41601	0.658	1	0.77721
Tesc	-0.47651	0.105	0.586	0.780448
Ttr	-1.14615	0.711	1	0.797059
Gm9856	-0.28969	0.053	0.517	0.800609
Hspa5	0.489189	1	1	0.812011
Sdhaf4	-0.36849	0.105	0.552	0.820618
Slc16a10	-0.547412	0.342	0.828	0.866032
Ube2d3	0.483544	0.947	0.897	0.871145
Cadps	-0.465347	0.184	0.69	0.900638
Irf2bp2	-0.433166	0.237	0.759	0.910257
Pts	-0.377363	0.263	0.828	0.942943
Sdhd	-0.365261	0.289	0.828	0.958117
Zcrb1	-0.559266	0.763	0.966	0.972326
Rbms3	-0.257255	0.053	0.517	0.989348
Nedd4	-0.503858	0.579	0.931	1
Anxa6	0.683412	0.789	0.517	1
Ralgds	0.684096	0.632	0.241	1
Zbtb7a	-0.389166	0.289	0.828	1
Gnai1	-0.368617	0.105	0.621	1
Xaf1	0.559908	0.474	0.034	1
Rnd3	0.52999	0.474	0.034	1
Sdcbp	0.588549	0.868	0.828	1
Spg7	-0.39093	0.105	0.552	1
Kcnk16	-0.52869	0.184	0.69	1
Grb2	0.641815	0.816	0.586	1
Sfpq	-0.42915	0.395	0.897	1
Pja1	-0.400811	0.105	0.552	1
Dync2h1	-0.373454	0.079	0.517	1
Zcchc18	-0.51931	0.211	0.69	1
Sorbs2	-0.34495	0.079	0.552	1
Ppdpf	-0.296254	0.132	0.621	1
Mrps30	-0.262852	0.026	0.414	1
Unc80	-0.510494	0.289	0.793	1
Zfand1	-0.266186	0.053	0.483	1
Rap1gap	-0.263032	0.105	0.621	1
Disp2	-0.388709	0.158	0.621	1
Ddc	-0.46448	0.026	0.414	1
Hist1h1c	-0.519155	0.263	0.724	1
Gm1673	-0.354105	0.132	0.586	1
Mrpl34	-0.401309	0.211	0.759	1
Txn1	0.546271	0.947	0.931	1
Cacna1a	-0.28401	0.132	0.621	1
Pyy	-0.505799	1	1	1
H1f0	-0.42483	0.263	0.793	1
Tceal3	-0.381357	0.158	0.69	1
Adgrg1	-0.33934	0.105	0.586	1
Fkbp4	-0.48576	0.447	0.931	1
2810402E24Rik	-0.260162	0	0.345	1
Necab2	-0.284695	0	0.345	1
Ghitm	0.605288	0.711	0.379	1
Atf5	-0.363031	0.132	0.621	1
Ppp1r10	-0.512997	0.211	0.724	1
Lima1	0.506472	0.553	0.138	1
Hspa8	0.54014	1	1	1
Man1a	-0.329772	0.211	0.69	1
1110065P20Rik	-0.33373	0.184	0.724	1
Cdcp1	0.563102	0.526	0.103	1
Rida	-0.253354	0.053	0.483	1
Rcn3	-0.396625	0.184	0.655	1
Minos1	-0.523891	0.579	0.966	1
Tnfaip3	0.678154	0.447	0.034	1
Hint2	-0.358443	0.211	0.724	1
Dido1	-0.300106	0.132	0.621	1
Rapgef4	-0.304489	0.053	0.448	1
Dut	-0.37213	0.211	0.69	1
Anxa7	0.593282	0.816	0.724	1
Vdac1	-0.330885	0.342	0.897	1
Zfp91	-0.353111	0.342	0.828	1
Mtfp1	-0.327594	0.053	0.448	1
Ifngr2	0.481957	0.5	0.069	1
Rbm4b	-0.345677	0.132	0.586	1
Ptpn1	0.567468	0.789	0.724	1
Zfp516	-0.289873	0.158	0.621	1
Gbp8	0.607988	0.395	0	1
Irgm2	0.597865	0.395	0	1
Gbp10	0.503491	0.395	0	1
C1ra	0.446206	0.395	0	1
Gm4951	0.439635	0.395	0	1
Pbrm1	-0.473952	0.289	0.759	1
Muc1	0.744889	0.579	0.172	1
Rab27a	-0.27792	0.079	0.483	1
Prrc2b	-0.316396	0.263	0.828	1
Rnf115	0.528423	0.737	0.345	1
Nap1l5	-0.354425	0.316	0.793	1
Prrc2a	-0.30855	0.263	0.828	1
Socs3	0.688377	0.763	0.517	1
Hsp90ab1	0.406321	1	1	1
Cdh2	-0.294401	0.211	0.724	1
Clu	1.0025	0.974	0.931	1
Gadd45b	0.990374	0.711	0.483	1
Sat1	0.933993	0.684	0.414	1
Arpc1a	-0.343885	0.763	1	1
Tmem140	0.563295	0.579	0.207	1
Lix1l	0.547897	0.579	0.207	1
Rnf167	-0.369388	0.079	0.483	1
Cbfa2t3	-0.281588	0.053	0.448	1
Fam241b	-0.286244	0.053	0.448	1
Arxes2	-0.292435	0.053	0.448	1
Pebp1	-0.427993	0.868	1	1
Scn3a	-0.316556	0.132	0.586	1
Mpc2	-0.406512	0.684	1	1
Arid2	-0.260719	0.079	0.517	1
Pabpc1	0.544438	0.921	0.966	1
Mrpl36	-0.414851	0.289	0.793	1
Dnajb9	0.591799	0.947	0.897	1
Pbxip1	-0.266396	0.105	0.552	1
Herc6	0.622163	0.579	0.207	1
Stxbp1	0.485225	0.737	0.552	1
Cdkn2b	0.485992	0.5	0.103	1
Erlin2	-0.252723	0	0.31	1
Msrb2	-0.255487	0	0.31	1
Acvr2a	-0.267795	0	0.31	1
Fbxl17	-0.274956	0	0.31	1
Mbd2	0.588619	0.737	0.586	1
Cd47	0.484559	0.947	0.931	1
Tmem27	-0.5957	0.947	0.966	1
Naa38	-0.330915	0.105	0.517	1
Mien1	-0.440284	0.579	0.931	1
Ifit3	0.989425	0.421	0.034	1
Pck2	-0.268309	0.053	0.448	1
Hif1a	0.726592	0.737	0.586	1
Tmem59	-0.336667	0.895	1	1
Eif4a1	0.424013	0.974	1	1
Hagh	-0.40082	0.237	0.724	1
Vat1l	-0.251664	0.105	0.586	1
Gnao1	-0.371143	0.447	0.862	1
Pla2g2f	-0.265656	0.026	0.379	1
Cd82	0.699576	0.658	0.345	1
Fas	0.615972	0.368	0	1
Sfrp5	-0.404079	0.053	0.414	1
Ebpl	-0.264863	0.105	0.552	1
Thra	-0.256875	0.105	0.517	1
Smdt1	-0.334631	0.868	1	1
Eif6	0.658994	0.789	0.586	1
Egr1	-0.647755	0.316	0.759	1
1110038F14Rik	0.570824	0.789	0.552	1
Gria3	-0.282629	0.053	0.414	1
Scd2	-0.423559	0.053	0.414	1
Fra10ac1	-0.250752	0.026	0.379	1
Tpt1	0.298144	1	1	1
Ddit3	0.645803	0.605	0.207	1
Tpr	-0.442005	0.553	0.897	1
Romo1	-0.409128	0.368	0.828	1
H2afy	-0.421523	0.868	0.966	1
Snhg20	-0.265534	0.132	0.586	1
Mlkl	0.449762	0.447	0.069	1
Nfic	-0.338163	0.342	0.828	1
Tap2	0.597146	0.658	0.379	1
Zfp398	-0.260295	0.105	0.483	1
Errfi1	0.59154	0.579	0.207	1
Tra2a	0.609941	0.737	0.586	1
Bmyc	-0.31959	0.158	0.621	1
Tnip1	0.525566	0.474	0.103	1
Tnfrsf1a	0.514616	0.711	0.448	1
Cfap36	-0.301391	0.289	0.828	1
Ldlr	-0.352669	0.184	0.655	1
March5	0.484908	0.868	0.828	1
Abcd3	-0.451211	0.237	0.655	1
Dgcr6	-0.259911	0.053	0.414	1
Zmynd8	-0.376493	0.289	0.759	1
Ptp4a2	0.617923	0.789	0.69	1
Kif1b	-0.445207	0.342	0.828	1
Pitpnm2	-0.290194	0.026	0.345	1
Eid1	-0.316536	0.579	1	1
Dnajc24	-0.264931	0.158	0.586	1
Nefm	-0.427438	0.053	0.414	1
Tob1	-0.28182	0.184	0.655	1
Gatad1	-0.36476	0.211	0.655	1
Vegfa	-0.392393	0.289	0.828	1
Ifi27	0.702418	0.684	0.414	1
Creb3	0.531648	0.711	0.517	1
Srsf5	-0.372564	0.842	0.966	1
Scgn	-0.403984	0.395	0.862	1
H2afz	-0.33809	0.868	0.966	1
Cldn7	0.715736	0.763	0.552	1
Nenf	-0.322602	0.789	1	1
Dbi	-0.351318	0.132	0.552	1
Rrm2b	-0.287256	0.079	0.448	1
Gpr180	-0.333054	0.158	0.586	1
Supt4a	-0.379239	0.158	0.586	1
Actg1	0.660259	1	1	1
Hamp	1.80031	0.342	0	1
Acod1	0.824699	0.342	0	1
Trim12a	0.540909	0.342	0	1
F830016B08Rik	0.48964	0.342	0	1
Cxcl16	0.396072	0.342	0	1
Zc3h12a	0.338699	0.342	0	1
Coa3	-0.418057	0.632	0.966	1
Fam173a	-0.321181	0.237	0.655	1
Enpp4	0.576494	0.605	0.241	1
Uqcc2	-0.468377	0.684	1	1
Acyp1	-0.318746	0.132	0.552	1
Shisa5	0.486199	0.737	0.552	1
Uqcr11	-0.414215	0.605	0.897	1
Tspan13	-0.365158	0.553	0.931	1
Baz2b	-0.289674	0.526	0.862	1
Hist1h2bc	-0.408621	0.421	0.862	1
Tns3	-0.258812	0.053	0.414	1
Sncb	-0.312887	0	0.276	1
Tmem205	-0.294448	0.132	0.552	1
Exph5	-0.257255	0.026	0.345	1
Atp11a	0.412335	0.526	0.172	1
Mrpl28	-0.343667	0.211	0.655	1
Acot13	-0.276308	0.132	0.552	1
Rab25	-0.279519	0.237	0.724	1
Zwint	0.40029	0.947	0.862	1
Cebpb	0.720022	0.684	0.414	1
Paip1	-0.382116	0.237	0.69	1
Lrpprc	-0.324927	0.132	0.552	1
Chp1	0.396023	0.553	0.172	1
Hmgn2	-0.38487	0.211	0.621	1
Ndufs5	-0.358247	0.711	1	1
Hspa4l	-0.402056	0.184	0.586	1
Fbxo9	-0.314021	0.158	0.586	1
Srsf6	-0.347579	0.474	0.897	1
Ndufb8	-0.396086	0.474	0.862	1
Hadh	-0.398234	0.079	0.414	1
Ptpn2	0.561922	0.658	0.379	1
Clec2d	0.481077	0.579	0.241	1
Oaz1	-0.318279	0.947	1	1
Efcab1	-0.266882	0.053	0.379	1
C8b	-0.278903	0.053	0.379	1
Jade1	-0.283434	0.079	0.448	1
Nkx6-1	-0.507765	0.289	0.69	1
Hsp90aa1	0.441211	1	1	1
Yeats4	-0.297856	0.184	0.621	1
Ndufv3	-0.382441	0.447	0.931	1
Ifitm3	0.751744	0.368	0.034	1
Tmed3	-0.427718	0.895	0.966	1
Stom	0.50583	0.316	0	1
Cd302	0.461121	0.316	0	1
Nsd1	-0.268854	0.316	0.897	1
Ufm1	0.462987	0.816	0.759	1
Eci2	-0.374147	0.421	0.793	1
Kif1a	-0.334259	0.316	0.724	1
Odc1	0.743519	0.684	0.448	1
AC149090.1	-0.522154	0.316	0.724	1
Ankrd10	-0.259146	0.079	0.414	1
F11r	0.398708	0.553	0.241	1
Cspp1	-0.263852	0.158	0.586	1
Rnf5	-0.288195	0.211	0.621	1
Itpr1	-0.305063	0.211	0.621	1
Psma4	0.334771	0.868	0.862	1
Ctsd	-0.454445	0.368	0.759	1
Gpr27	-0.272429	0.079	0.414	1
Pcbd1	-0.447487	0.579	1	1
Smarca1	-0.530688	0.263	0.655	1
Ctsb	0.580577	0.842	0.862	1
Suds3	-0.289658	0.184	0.586	1
Kif12	-0.294827	0.184	0.586	1
Svip	-0.272849	0.105	0.483	1
Aes	-0.427616	0.816	1	1
Pappa2	-0.436963	0.447	0.828	1
Myt1l	-0.276117	0.132	0.517	1
Peg3	-0.44274	0.921	1	1
Gclm	-0.303362	0.526	0.966	1
Amotl1	-0.290607	0.053	0.379	1
Prpf8	-0.250821	0.184	0.586	1
Atp5h	-0.320332	0.947	0.966	1
Psmb4	0.453128	0.921	0.897	1
Scp2	-0.383036	0.526	0.931	1
Sdc4	0.532851	0.921	0.931	1
Irf7	0.367768	0.395	0.069	1
Rtn4	0.628292	0.842	0.862	1
Rab1a	0.41285	0.842	0.793	1
Pxdc1	0.442193	0.395	0.069	1
Fnta	-0.263972	0.158	0.517	1
Qdpr	-0.265908	0.263	0.724	1
Mtch1	-0.407955	0.553	0.862	1
Atxn10	-0.299684	0.579	0.897	1
Abhd16a	0.393398	0.737	0.483	1
Arid5a	0.392271	0.395	0.069	1
Sh3glb1	0.407297	0.921	0.793	1
Gadd45g	0.67799	0.684	0.448	1
Tmco1	-0.277011	0.263	0.724	1
Slc30a5	-0.303482	0.211	0.655	1
Eif3e	0.394376	0.816	0.586	1
Ptov1	-0.38052	0.447	0.862	1
Chic1	-0.427619	0.447	0.862	1
Gstm1	-0.325443	0.132	0.517	1
Arsb	-0.250836	0.211	0.621	1
Cdc123	-0.268952	0.263	0.724	1
Sox4	-0.277945	0.105	0.483	1
Cldn4	0.769804	0.553	0.276	1
Pura	-0.418422	0.632	0.897	1
Pdia4	-0.366841	0.474	0.862	1
Cxcl2	2.83337	0.342	0.034	1
Cxcl1	2.20634	0.342	0.034	1
Gprasp1	-0.260143	0.184	0.586	1
Fosl2	0.38066	0.289	0	1
Anxa2	0.379111	0.289	0	1
Tex261	-0.307278	0.474	0.793	1
Krt7	-0.352466	0.368	0.828	1
Hspa1b	0.72313	0.342	0.034	1
Btf3	0.323783	1	1	1
Gtpbp2	0.538617	0.579	0.31	1
Nars	0.413036	0.684	0.517	1
Tmed8	-0.282306	0.132	0.517	1
Borcs7	-0.300037	0.158	0.517	1
Cd9	0.552428	0.789	0.586	1
Polr2g	-0.367539	0.526	0.931	1
Ppp1r15a	0.312024	0.605	0.379	1
Arpc1b	0.523916	0.711	0.483	1
As3mt	-0.252286	0.184	0.586	1
Ubtf	-0.292287	0.184	0.586	1
Stat3	0.350455	0.842	0.828	1
Mrpl57	-0.310932	0.368	0.828	1
Gsap	0.412884	0.447	0.138	1
Serpinb9	0.442362	0.579	0.241	1
1810043G02Rik	-0.263385	0.079	0.379	1
Vkorc1	-0.326426	0.237	0.621	1
Rp9	-0.266585	0.342	0.828	1
Bcl2l1	0.420751	0.579	0.31	1
Il6ra	-0.36905	0.184	0.552	1
Plscr1	0.809843	0.5	0.207	1
Abcc8	-0.304474	0.842	0.966	1
Tox4	0.49274	0.658	0.448	1
Kdelr3	-0.250728	0.237	0.621	1
Chd4	-0.392222	0.368	0.724	1
Ndst4	-0.2912	0.079	0.379	1
Gls	-0.442081	0.368	0.793	1
0610009B22Rik	-0.383487	0.342	0.724	1
Bsg	-0.446298	0.974	1	1
Nampt	0.365968	0.658	0.414	1
Dync2li1	-0.332173	0.158	0.517	1
Mapk8ip1	-0.333998	0.316	0.724	1
Csde1	0.388103	0.868	0.828	1
Lrch1	0.376887	0.421	0.103	1
Parp12	0.3526	0.553	0.241	1
Ccnd1	-0.320533	0.289	0.69	1
Ufc1	-0.284046	0.763	0.931	1
Arf4	0.360352	0.947	0.931	1
Atp1b3	-0.332552	0.263	0.621	1
Mcl1	0.526962	0.684	0.552	1
Ndrg3	-0.27365	0.211	0.621	1
Gstz1	-0.298676	0.237	0.586	1
Gpd2	-0.319092	0.105	0.448	1
Helz	-0.360773	0.211	0.586	1
Hnrnpa3	0.473334	0.921	0.897	1
Phf14	-0.29943	0.184	0.552	1
Ppp1r14b	-0.360375	0.474	0.862	1
Ccdc88a	-0.314678	0.316	0.69	1
Pde1c	0.409744	0.368	0.069	1
Myl12a	0.424847	0.737	0.586	1
Ece1	-0.349493	0.289	0.655	1
Dcaf8	-0.276505	0.211	0.621	1
Smarcc1	-0.257384	0.132	0.483	1
Sec61g	0.302905	0.974	1	1
Ostc	-0.265029	0.895	1	1
Cystm1	0.332044	0.974	0.931	1
Tgif1	0.37802	0.368	0.069	1
Serpina3f	0.459312	0.263	0	1
Stx11	0.283906	0.263	0	1
Gng12	0.43697	0.789	0.655	1
Cpn1	-0.256259	0.132	0.483	1
Cnksr1	0.301554	0.316	0.034	1
Zfp592	0.281846	0.316	0.034	1
Manea	0.257214	0.316	0.034	1
Crem	0.461451	0.579	0.276	1
Tulp4	-0.331693	0.289	0.69	1
Chga	-0.528004	0.974	1	1
2410015M20Rik	-0.361298	0.632	0.897	1
Ola1	-0.302627	0.342	0.793	1
Upf3b	-0.330712	0.421	0.828	1
Unc93b1	0.42954	0.447	0.172	1
Eif1	0.290437	1	1	1
Ly96	0.477898	0.421	0.138	1
Banf1	-0.258377	0.184	0.552	1
Psma6	0.346977	0.789	0.724	1
Psma3	0.286316	0.974	0.966	1
Msi2	-0.389993	0.526	0.862	1
Fdps	-0.284114	0.237	0.655	1
Ppp1r1a	-0.250188	0	0.207	1
Dpm3	-0.31305	0.447	0.793	1
Hnrnpa1	0.450332	0.711	0.655	1
Tnrc6b	-0.339298	0.263	0.655	1
Coq7	-0.256091	0.211	0.621	1
Oasl2	0.370869	0.316	0.034	1
Fam84a	0.25798	0.316	0.034	1
Cox17	-0.316365	0.421	0.828	1
Krt18	0.649462	0.816	0.828	1
Eif5	0.350053	0.947	0.966	1
Rassf4	0.414334	0.474	0.172	1
Gng5	0.321212	1	0.966	1
Itsn2	-0.251784	0.184	0.552	1
Myo6	-0.273004	0.184	0.552	1
Rad21	-0.300841	0.368	0.862	1
Dbp	-0.25195	0.184	0.552	1
Park7	-0.331803	0.632	1	1
Psma1	0.369584	0.868	0.897	1
Ten1	-0.267079	0.211	0.586	1
Whamm	0.363937	0.5	0.241	1
Rack1	0.259403	1	1	1
Fos	-0.372984	0.105	0.414	1
Rock1	-0.29581	0.553	0.828	1
Ifitm2	0.945163	0.816	0.862	1
Susd6	0.460741	0.526	0.31	1
Tmtc1	0.432128	0.5	0.241	1
Pik3c2a	0.375571	0.526	0.276	1
Saraf	0.28458	0.895	0.897	1
Maged1	-0.407642	0.947	1	1
Znfx1	0.461317	0.447	0.172	1
Cblc	0.403055	0.342	0.069	1
St6galnac4	0.327168	0.421	0.138	1
AY036118	-0.298887	0.316	0.69	1
Prpf39	0.337459	0.632	0.379	1
Zc3h7a	0.348915	0.658	0.448	1
Maged2	-0.266431	0.395	0.793	1
Stx7	0.454572	0.789	0.655	1
Fkbp2	-0.312475	0.842	1	1
Rmdn3	0.343648	0.579	0.31	1
Ctnna1	0.404841	0.763	0.69	1
Tmem147	-0.253281	0.316	0.69	1
Dnajc12	-0.263408	0.368	0.828	1
Usp18	0.435291	0.474	0.172	1
Pak1	0.308507	0.342	0.069	1
Rnh1	0.323476	0.868	0.724	1
Selenom	-0.329868	0.474	0.828	1
Slc30a8	-0.29404	0.079	0.345	1
Psmd7	0.303232	0.842	0.828	1
Hdac1	-0.260926	0.132	0.448	1
H2-Q4	0.396063	0.474	0.207	1
Atp1b1	-0.32969	0.395	0.724	1
Kif21a	-0.347908	0.421	0.759	1
Cd40	0.374346	0.237	0	1
Eif1b	-0.319822	0.579	0.897	1
Eef1a1	0.308356	1	1	1
Ndufa8	-0.275224	0.5	0.897	1
Dld	0.373421	0.632	0.379	1
Hivep3	0.456477	0.553	0.345	1
Stx12	0.33279	0.5	0.276	1
Adam17	0.318151	0.342	0.069	1
Rhou	0.510645	0.763	0.586	1
Sez6l	-0.359635	0.053	0.31	1
Isl1	-0.401315	0.684	0.828	1
Arl1	0.365864	0.921	0.897	1
Hilpda	0.377853	0.526	0.276	1
Cox5b	-0.318034	0.737	1	1
Rpl3	0.271275	1	1	1
Atraid	-0.379848	0.632	0.862	1
Atp8b1	-0.27507	0.316	0.69	1
Pim1	0.360104	0.342	0.069	1
Spen	-0.272368	0.263	0.655	1
Nectin2	0.414329	0.447	0.172	1
Spata13	0.257453	0.289	0.034	1
Gch1	0.519912	0.763	0.69	1
Eprs	-0.370467	0.684	0.897	1
Calm3	-0.303168	0.684	0.828	1
Mgarp	-0.27481	0.053	0.31	1
Atp5e	-0.280411	0.868	1	1
Ndufb9	-0.324728	0.737	0.897	1
Crybb3	-0.288842	0.026	0.241	1
Rps2	0.290238	1	1	1
Glrx5	-0.279097	0.263	0.586	1
Ccrl2	0.45214	0.289	0.034	1
Cmpk1	0.361454	0.816	0.759	1
Nupr1	0.843134	0.368	0.103	1
Rnf213	0.332225	0.368	0.103	1
Fmnl2	0.383015	0.526	0.241	1
Cenpv	-0.361744	0.421	0.793	1
Twsg1	-0.268117	0.289	0.724	1
Kars	0.350023	0.553	0.31	1
Agfg1	0.38695	0.711	0.517	1
Lrrn1	0.446735	0.368	0.103	1
Parp10	0.29337	0.368	0.103	1
Hdlbp	-0.261176	0.816	0.966	1
Picalm	0.383603	0.605	0.379	1
Ndel1	0.395161	0.579	0.345	1
Ndufa1	-0.417526	0.658	0.931	1
Rpl29	0.340672	1	0.966	1
Stard10	-0.331712	0.316	0.69	1
Acin1	-0.300775	0.447	0.897	1
Pnn	-0.330672	0.5	0.931	1
Samhd1	0.344289	0.368	0.103	1
Ugt2b34	-0.289058	0.474	0.828	1
Nmd3	0.266642	0.447	0.172	1
Dusp26	-0.268842	0.105	0.379	1
Gtf2a2	-0.322443	0.395	0.759	1
Luc7l2	-0.317835	0.684	0.931	1
Cisd1	-0.318629	0.684	0.931	1
Pcsk1n	-0.256779	1	1	1
Ndufa13	-0.26406	0.816	0.966	1
Tmem160	-0.252835	0.289	0.621	1
Cpne8	0.45576	0.5	0.276	1
Tmem208	-0.320933	0.368	0.724	1
Mtch2	0.394045	0.711	0.552	1
Srsf1	-0.284929	0.316	0.621	1
Tspan15	-0.262839	0.263	0.655	1
Herpud1	0.347071	0.842	0.793	1
Cp	0.437675	0.211	0	1
Ndufa6	-0.267391	0.711	0.897	1
Fam46c	0.391773	0.5	0.31	1
Spint1	0.340574	0.763	0.621	1
Ly6e	0.631926	0.711	0.621	1
Gtf2i	-0.291483	0.342	0.759	1
Cuedc2	-0.273913	0.237	0.586	1
Ncor1	-0.30856	0.605	0.931	1
Ddhd2	-0.267265	0.105	0.379	1
Sowahc	0.384621	0.579	0.414	1
Ndufb3	-0.339112	0.553	0.862	1
Syp	-0.261558	0.263	0.586	1
Dyrk3	0.38466	0.263	0.034	1
Fbxo34	0.298896	0.263	0.034	1
Orai2	0.28313	0.263	0.034	1
F3	0.276929	0.263	0.034	1
Slco3a1	0.330742	0.474	0.207	1
Rras	0.297096	0.368	0.103	1
H2-T22	0.376376	0.526	0.31	1
Smc3	-0.337454	0.316	0.655	1
Ran	0.33204	0.974	0.862	1
Rabac1	-0.262109	0.895	1	1
Skil	0.41241	0.658	0.483	1
Tia1	-0.299705	0.395	0.759	1
Pten	-0.277719	0.316	0.621	1
Aida	0.420583	0.474	0.241	1
Rab5c	0.445289	0.605	0.448	1
Spin1	0.379819	0.5	0.276	1
2900093K20Rik	-0.262623	0.158	0.448	1
Acly	-0.39038	0.447	0.759	1
2810474O19Rik	0.287622	0.605	0.31	1
Mrfap1	-0.281052	0.974	1	1
St3gal1	0.351784	0.342	0.103	1
Ndufc1	-0.257633	0.605	0.897	1
Chka	0.435973	0.789	0.655	1
Cited2	-0.252292	0.263	0.586	1
Ep300	-0.253633	0.263	0.552	1
Hspa1a	1.40865	0.368	0.138	1
Csnk1a1	-0.257097	0.737	0.966	1
Anp32e	-0.272131	0.289	0.655	1
Ppib	-0.262101	0.579	0.897	1
Pax6	-0.362916	0.632	0.966	1
Bcl10	0.309944	0.474	0.241	1
Selenof	-0.265372	0.895	1	1
Brd4	0.325847	0.553	0.379	1
Fgl2	0.411875	0.895	0.724	1
Ddt	-0.257434	0.289	0.621	1
Hs6st1	0.422749	0.789	0.724	1
Dpy30	-0.294579	0.263	0.586	1
Tax1bp1	0.322885	0.947	0.931	1
Setd3	-0.260719	0.368	0.724	1
Cdc37	-0.254252	0.447	0.759	1
Arf5	-0.323304	0.868	0.966	1
Mafk	0.257204	0.447	0.207	1
Upp1	0.577215	0.579	0.379	1
Tmem176b	0.441242	0.947	0.966	1
Avl9	0.362534	0.579	0.448	1
Ube2s	-0.333394	0.474	0.862	1
Nfkbib	0.35945	0.5	0.276	1
Eno1	-0.298493	0.316	0.69	1
Myo1b	0.394082	0.553	0.345	1
Atp5g1	-0.33248	0.763	0.966	1
Pml	0.255348	0.342	0.103	1
Ahcyl2	-0.279334	0.211	0.517	1
Eif4ebp1	0.254373	0.368	0.103	1
Ssr3	0.328734	0.842	0.897	1
Mier1	-0.296007	0.263	0.621	1
Tusc3	-0.319269	0.579	0.828	1
Gm45159	0.461734	0.711	0.552	1
Ogfr	0.333657	0.632	0.483	1
Tmem33	0.274728	0.658	0.448	1
Rabggtb	0.345655	0.632	0.448	1
Ssbp2	0.33999	0.632	0.448	1
Ash1l	-0.257891	0.526	0.793	1
Ctbp1	-0.303652	0.447	0.793	1
Npm1	0.324239	0.974	1	1
Rps29	0.256703	1	1	1
Setbp1	0.315879	0.5	0.276	1
P4ha1	-0.370138	0.368	0.69	1
Ikbke	0.266372	0.289	0.069	1
Cwf19l2	0.279166	0.474	0.276	1
Rab11a	0.290225	0.816	0.724	1
Snrpb	0.331498	0.868	0.828	1
Relb	0.340083	0.368	0.138	1
4930453N24Rik	0.276863	0.421	0.172	1
Nts	1.01127	0.184	0	1
Gm4841	0.330013	0.184	0	1
Trafd1	0.528744	0.526	0.379	1
Slc25a4	-0.275007	0.763	1	1
Drap1	-0.285027	0.684	0.931	1
Ndufa5	-0.286185	0.447	0.759	1
Fermt2	0.340336	0.632	0.448	1
Spint2	-0.268454	0.974	1	1
Flot2	0.290571	0.474	0.241	1
Shb	0.396868	0.553	0.345	1
Fgb	1.52541	0.579	0.414	1
Cflar	0.324955	0.632	0.517	1
Timp1	0.858971	0.237	0.034	1
Gpx4	-0.301915	0.816	0.966	1
Dhx15	0.350413	0.5	0.276	1
Fxyd6	-0.330398	0.184	0.448	1
Gnai2	-0.264294	0.842	0.966	1
Fndc3a	0.280746	0.895	0.931	1
Ndufs2	-0.276002	0.553	0.897	1
Tecr	-0.289938	0.684	0.931	1
Tmbim6	0.259999	0.947	1	1
Zcchc6	0.436011	0.658	0.621	1
Slc25a5	-0.262477	0.737	0.931	1
Fkbp11	-0.270188	0.342	0.655	1
Ilf2	0.436925	0.632	0.586	1
Zfp36	0.398662	0.368	0.138	1
Acbd6	0.291685	0.605	0.483	1
Hspe1	-0.268787	0.658	1	1
Serp1	0.264682	0.868	0.897	1
Cox8a	-0.250583	0.921	1	1
Snrpd2	-0.253514	0.474	0.828	1
Tmem256	-0.349085	0.421	0.793	1
Pam	-0.343047	0.868	0.966	1
H2afv	-0.273418	0.526	0.793	1
Epcam	0.403301	0.947	0.966	1
Ndufb7	-0.252582	0.658	0.931	1
Hmgb1	-0.321555	0.763	1	1
Cggbp1	0.308195	0.553	0.345	1
Atp5d	-0.252297	0.763	1	1
Sema4b	0.251584	0.368	0.138	1
Selenot	-0.28513	0.474	0.793	1
Rbms1	0.34002	0.421	0.207	1
Abi1	0.250793	0.421	0.207	1
S100a11	0.57796	0.895	0.966	1
Swi5	-0.297824	0.868	1	1
Rpl38	0.261799	1	1	1
Rbm39	0.273052	0.974	1	1
Tmpo	-0.339149	0.316	0.586	1
Tomm7	-0.269169	0.684	0.966	1
Sfr1	-0.267437	0.711	0.897	1
Ccl5	0.962285	0.158	0	1
Tnfaip2	0.464752	0.158	0	1
Rtcb	0.299766	0.684	0.586	1
Ptp4a1	0.428542	0.579	0.448	1
Alkbh5	0.264471	0.737	0.483	1
Dap	0.266839	0.921	0.966	1
Aen	0.353298	0.342	0.138	1
Dst	-0.300105	0.711	0.897	1
Csrp1	0.29768	0.342	0.138	1
Eif4b	0.332337	0.632	0.483	1
Dctn3	-0.266683	0.447	0.828	1
Rbm7	0.317987	0.605	0.517	1
Stub1	-0.292328	0.658	0.931	1
Ncbp2	-0.258284	0.237	0.483	1
Stx3	0.37741	0.553	0.448	1
Cnpy2	-0.26572	0.684	0.862	1
Ube2e2	0.33462	0.447	0.276	1
Efhd2	0.300557	0.395	0.207	1
Tuba4a	0.458165	0.605	0.586	1
Atp5g2	-0.313147	0.921	1	1
Pde4d	-0.251545	0.263	0.552	1
Ehd1	0.83616	0.421	0.241	1
Kcnq1ot1	-0.263259	0.763	1	1
Elf3	0.365639	0.5	0.345	1
Ptprn	-0.369198	0.658	0.966	1
Rbp4	-0.447051	0.789	1	1
Nop58	0.34223	0.5	0.345	1
Gc	-0.295281	0.789	0.966	1
Erap1	0.256565	0.553	0.379	1
Ppp2r2d	0.259731	0.579	0.414	1
Neat1	0.669946	0.947	0.966	1
Lbp	0.417075	0.263	0.069	1
Creg1	-0.274129	0.342	0.621	1
Tmsb4x	-0.411165	0.868	0.931	1
Azi2	0.253726	0.632	0.517	1
Scfd1	0.263021	0.947	0.897	1
Maff	0.326796	0.289	0.103	1
Ccng1	0.289248	0.342	0.138	1
Bcl3	0.371109	0.526	0.345	1
Gdi2	0.268512	0.763	0.724	1
Klf5	0.281267	0.342	0.138	1
Nab1	0.359107	0.474	0.345	1
Adh5	-0.283182	0.316	0.552	1
Ifit3b	0.337359	0.132	0	1
Ifi35	0.314407	0.368	0.172	1
Sst	-0.451015	0.105	0.31	1
Selenop	0.291685	0.974	1	1
Ifih1	0.265203	0.342	0.172	1
Ppp1r2	-0.260715	0.579	0.759	1
Jak2	0.30698	0.421	0.241	1
Rnf121	0.297865	0.421	0.241	1
Pfkp	0.397873	0.526	0.379	1
Ccdc25	0.265695	0.526	0.414	1
Mxd1	0.380209	0.421	0.276	1
Katna1	0.299687	0.421	0.241	1
Snx6	0.382792	0.553	0.483	1
Nxf1	-0.269528	0.368	0.621	1
Tmbim1	0.258327	0.474	0.345	1
Ube2q1	-0.254136	0.316	0.552	1
Tpst1	0.287682	0.447	0.31	1
Sh3rf1	0.258044	0.184	0.034	1
2010107E04Rik	0.259346	0.658	0.621	1
Gng2	0.270341	0.289	0.103	1
Nmi	0.291193	0.421	0.276	1
Gna13	0.301847	0.5	0.345	1
Erp44	0.260349	0.789	0.655	1
Imp4	0.275432	0.368	0.207	1
Resp18	-0.31368	0.974	1	1
Lrrc59	0.326995	0.579	0.517	1
Etf1	0.261183	0.579	0.517	1
Ninj1	0.404032	0.658	0.724	1
Ets2	0.301711	0.526	0.448	1
Calb1	-0.307168	0.368	0.586	1
Fabp5	0.386748	0.447	0.241	1
Eif5a	0.28518	0.947	0.966	1
Pkm	-0.278876	0.947	0.966	1
Gemin7	0.262807	0.579	0.483	1
Ldha	0.516819	0.263	0.103	1
Pdlim7	0.272238	0.263	0.103	1
Brd1	0.314079	0.421	0.241	1
Hspb1	0.815853	0.289	0.138	1
Mapk6	0.401068	0.421	0.31	1
Rgs17	0.332317	0.395	0.241	1
Rbm3	0.261796	1	0.966	1
Glrx3	0.282965	0.658	0.448	1
Csnk1d	0.265124	0.474	0.345	1
Lcn2	1.57195	0.105	0	1
Lrg1	1.17776	0.105	0	1
Tm4sf1	0.277241	0.105	0	1
Ufd1	0.274506	0.474	0.379	1
Ctnnb1	0.461558	0.816	0.862	1
Heg1	0.260336	0.395	0.241	1
Cpm	0.262018	0.316	0.172	1
Hdac2	-0.273904	0.211	0.414	1
Tm4sf4	0.416499	0.895	1	1
Ifrd1	0.25972	0.526	0.414	1
Map2k1	0.296577	0.447	0.31	1
Akap13	0.419017	0.5	0.414	1
Tmcc3	0.330656	0.316	0.172	1
Wars	0.384909	0.421	0.276	1
Arpc5	0.287429	0.658	0.69	1
Hivep2	0.298369	0.421	0.31	1
H6pd	0.267919	0.316	0.172	1
Prom1	0.328881	0.342	0.207	1
Grn	0.321072	0.342	0.207	1
Gm20186	0.342143	0.158	0.034	1
Tmem251	0.338395	0.395	0.241	1
Grina	0.274175	0.447	0.345	1
Prr13	0.303273	0.526	0.483	1
Cebpg	0.301351	0.526	0.483	1
Rala	0.333117	0.711	0.759	1
Clptm1l	0.328321	0.605	0.621	1
Tmem176a	0.257247	0.974	1	1
Kcmf1	0.257518	0.632	0.69	1
Tpm3	0.331416	0.579	0.552	1
Arfip1	0.299804	0.395	0.31	1
Zfand5	0.263169	0.658	0.69	1
Epb41l4b	0.298653	0.526	0.448	1
Btg2	-0.38802	0.737	0.793	1
Hdgf	-0.279143	0.658	0.931	1
Cttnbp2	0.422128	0.316	0.207	1
C1qbp	0.347329	0.474	0.379	1
Faf2	0.267207	0.368	0.276	1
Iapp	-0.334671	0.895	1	1
Tagln2	0.379211	0.658	0.655	1
Dnaja2	0.26664	0.605	0.621	1
Fxyd3	-0.294167	0.342	0.552	1
Camk2d	0.254198	0.553	0.483	1
Btbd17	0.25336	0.237	0.103	1
Grk3	0.295128	0.5	0.448	1
Esyt2	0.293126	0.368	0.276	1
Vwa5a	0.318495	0.474	0.414	1
Ext1	0.262187	0.263	0.138	1
Cnn3	0.351699	0.447	0.379	1
Purb	0.260503	0.5	0.414	1
Rab6a	0.287454	0.526	0.414	1
Bhlhe40	0.284391	0.395	0.276	1
Pdcd6ip	0.253942	0.579	0.655	1
Mt1	0.295004	0.895	0.862	1
Naa20	0.290624	0.605	0.69	1
Rnf14	0.257279	0.579	0.552	1
Mark2	0.260549	0.553	0.517	1
Gcnt2	0.316067	0.395	0.345	1
Lpin2	0.264624	0.421	0.345	1
Idnk	0.251998	0.605	0.552	1
Dusp1	0.30901	0.237	0.138	1
Cln5	0.279814	0.342	0.276	1
Manf	0.303663	0.974	0.966	1
Pigr	0.354912	0.158	0.069	1
Lap3	0.297011	0.447	0.483	1
Fam46a	0.378382	0.395	0.345	1
Gde1	0.260043	0.816	0.897	1
Mif4gd	0.299555	0.368	0.276	1
Tsc22d1	0.280444	0.684	0.759	1
Polr2k	0.250905	0.526	0.483	1
Plet1	0.534604	0.105	0.034	1
Jun	0.289532	0.921	0.897	1
Rragc	0.26214	0.5	0.517	1
Misp	0.256808	0.184	0.103	1
Pkdcc	0.275536	0.526	0.517	1
Asns	0.265196	0.395	0.345	1
Abca3	0.254789	0.316	0.276	1
Spp1	0.265661	0.921	0.966	1
Cpeb4	0.342599	0.5	0.621	1
Mrpl33	0.255531	0.658	0.759	1
Id3	-0.333569	0.474	0.517	1
Dnajb1	0.263164	0.368	0.31	1
Aldoa	-0.313599	0.921	1	1
Rgs4	0.250814	0.316	0.483	1
Mt2	0.44144	0.526	0.621	1
Lif	0.251225	0.105	0.069	1
Mast4	0.355056	0.579	0.759	1
Ero1l	0.477102	0.316	0.448	1
Gpi1	-0.280575	0.737	0.793	1
Tspan8	0.254572	0.947	1	1
Gdf15	0.448551	0.158	0.172	1
