# Supplementary material for: Single-cell RNA sequencing of mouse islets exposed to proinflammatory cytokines
Source: Life Sci Alliance. 2021 Apr 21;4(6):e202000949. doi: 10.26508/lsa.202000949 (PMC8091599; doi:10.26508/lsa.202000949)
Supplement: Supplementary file 9 [file LSA-2020-00949_TableS9.xlsx]

## Sheet: Sheet1
Gene	Forward Primer	Reverse Primer
Arx	5’-GCA CCA CGT TCA CCA GTT AC-3’	5’-TCT GTC AGG TCC AGC CTC AT-3’
Cxcl10	5’-CCA CGT GTT GAG ATC ATT GCC-3’	5’-GAG GCT CTC TGC TGT CCA TC-3’
Defb1	5’-TTC ACA TCC TCT CTG CAC TCT G-3’	5’-GTC CAA GAC TTG TGA GAA TGC C-3’
Gapdh	5’-GAC ATC AAG AAG GTG GTG AAG C-3’	5’-TCC AGG GTT TCT TAC TCC TTG G-3’
Gbp5	5’-GGG GAT CTG GAT GTG GTG TG-3’	5’-GCA ATA GGT CGA TAG CCC CC-3’
Hadh	5’-GAC AAG ACC GAT TTG CTG GC-3’	5’-TGT CTT CTG GCT GGT CAT CG-3’
Hhex	5’-CGG ACG GTG AAC GAC TAC AC-3’	5’-AAC CTC ACT TGA CCG CCT TT-3’
Icam1	5’-GTC TGC ACC CAG TGC TAG TG-3’	5’-GGA AGG CTT CTC TGG GAT GG-3’
Irf1	5’-GAC CCT GGC TAG AGA TGC AG-3’	5’-CTC CGG AAC AGA CAG GCA TC-3’
Mafa	5’-CCT GTA GAG GAA GCC GAG GAA-3’	5’-CCT CCC CCA GTC GAG TAT AGC-3’
Nos2	5’-CGA GAC TTC TGT GAC ACA CAG C-3’	5’-CAT CTC CTG GTG GAA CAC AGG G-3’
Pdx1	5’-GAC CTT TCC CGA ATG GAA CC-3’	5’-TTT CCA CGC GTG AGC TTT G-3’
Ptgs2	5’-TTT GTT GAG TCA TTC ACC AGA CAG AT-3’	5’-CAG TAT TGA GGA GAA CAG ATG GGA TT-3’
Slc2a2	5’-TTC AGC AAC TGG GTC TGC AA-3’	5’-TGA AGA TCA GGA CCA CCC CA-3’
